# Supplementary material for: Vinyl Ether/Tetrazine Pair for the Traceless Release of Alcohols in Cells
Source: PubMed Central journal article supplement (PMC6485351; doi:10.1002/anie.201609607), 2016-12-08
Supplement: NIHMS72730-supplement-Supporting_information.pdf [file NIHMS72730-supplement-Supporting_information.pdf]

## Supporting Information

### **Vinyl Ether/Tetrazine Pair for the Traceless Release of Alcohols in Cells**

*Ester Jiménez-Moreno, Zijian Guo, Bruno L. Oliveira, Inês S. Albuquerque, Annabel Kitowski, Ana Guerreiro, Omar Boutureira, Tiago Rodrigues, Gonzalo Jiménez-Osés, and Gonçalo J. L. Bernardes\**

anie\_201609607\_sm\_miscellaneous\_information.pdf

## TABLE OF CONTENTS

|                                                                                          |    |
|------------------------------------------------------------------------------------------|----|
| 1. ORGANIC SYNTHESIS.....                                                                | 2  |
| <i>General information</i> .....                                                         | 2  |
| <i>General procedures</i> .....                                                          | 2  |
| <i>Synthesis of vinyl ethers</i> .....                                                   | 3  |
| <i>Decaging reactions</i> .....                                                          | 6  |
| <i>Synthesis of tetrazine 2c</i> .....                                                   | 9  |
| 2. DETERMINATION OF KINETIC RATE CONSTANTS:.....                                         | 10 |
| 3. STABILITY IN PBS .....                                                                | 11 |
| 4. RELEASE STUDIES BY <sup>1</sup> H-NMR.....                                            | 14 |
| 5. RELEASE STUDIES OF COMPOUND 5 BY HPLC:.....                                           | 14 |
| 6. TABLE S1: Examples of FDA approved alcohol-containing drugs (cf DrugBank v5.0). ..... | 20 |
| 7. IN VIVO DECAGING METHODS.....                                                         | 21 |
| 8. COMPUTATIONAL DETAILS.....                                                            | 24 |
| 9. NMR SPECTRA.....                                                                      | 51 |
| 10. REFERENCES .....                                                                     | 62 |

## 1. ORGANIC SYNTHESIS

### *General information*

Chemicals were purchased and used without further purification. All solvents were purified by distillation over drying agents. Unless stated otherwise, reactions were carried out under a dry argon atmosphere in vacuum-flame dried glassware. Detection was by examination under UV light (254 nm) and by charring with potassium permanganate. Flash column chromatography was performed using silica gel [Merck, 230–400 mesh (40–63  $\mu\text{m}$ )].  $^1\text{H}$  NMR and  $^{13}\text{C}$  NMR spectra were measured in the solvent stated at 500 or 400 and 126 or 101 MHz respectively. Chemical shifts are quoted in parts per million from residual solvent peak ( $\text{CDCl}_3$ :  $^1\text{H}$  - 7.26 ppm and  $^{13}\text{C}$  - 77.16 ppm) and coupling constants ( $J$ ) given in Hertz. Multiplicities are abbreviated as: b (broad), s (singlet), d (doublet), t (triplet), q (quartet), m (multiplet) or combinations thereof. High-resolution mass spectrometry (HRMS) spectra were recorded on a Waters LCT Premier mass spectrometer. Calculated and exact  $m/z$  values are reported in Daltons.

### *General procedures*

**General procedure A<sup>[1]</sup>:** To a solution of the corresponding phenol (1.0 mmol) in  $\text{CH}_3\text{CN}$  (3 mL), anhydrous  $\text{Cu}(\text{OAc})_2$  (1.2 mmol) was added. The mixture was purged under vacuum and  $\text{O}_2$  was introduced in the flask. Tetravinyltin (1.2 mmol) was then added and the reaction was allowed to stir at room temperature overnight. After completion, the mixture was poured into an aqueous 25 %  $\text{NH}_4\text{OAc}$  solution (25 mL) and stirred for 10 mins. Then, the aqueous phase was extracted with EtOAc three times and the combined organic layers were washed by brine, dried over anhydrous  $\text{MgSO}_4$  and concentrated. Finally, the residue was purified by flash chromatography.

**General procedure B:** A solution of the corresponding vinyl ether (1.0 mmol) and 3,6-di-2-pyridyl-1,2,4,5-tetrazine (2.0 mmol) in  $\text{CH}_2\text{Cl}_2$  (10 mL) was stirred at room temperature. After completion, the reaction mixture was concentrated and the crude product was purified by flash chromatography.

## Synthesis of vinyl ethers

### Synthesis of compound 1b:

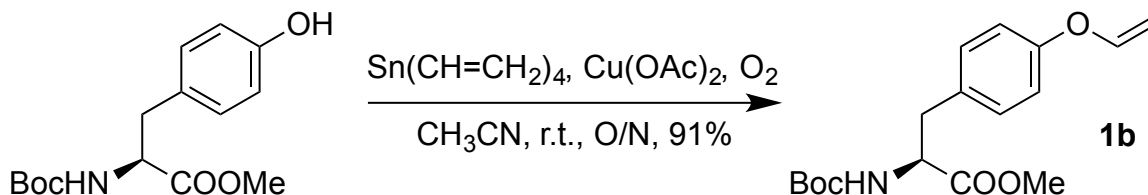

Following the general procedure A, compound 1b (292 mg, 0.91 mmol, 91%) was obtained from N-(tert-butoxycarbonyl)-L-tyrosine methyl ester (321 mg, 1 mmol), Cu(OAc)<sub>2</sub> (218 mg, 1.2 mmol) and tetravinyltin (218  $\mu$ L, 1.2 mmol). The residue was purified by flash chromatography (petroleum ether/ethyl acetate 1:0 to 4:1) <sup>1</sup>H NMR (400 MHz, CDCl<sub>3</sub>)  $\delta$  7.10 – 7.04 (m, 2H), 6.97 – 6.90 (m, 2H), 6.61 (dd,  $J$  = 13.7, 6.1 Hz, 1H), 4.97 (d,  $J$  = 8.3 Hz, 1H), 4.74 (dd,  $J$  = 13.7, 1.6 Hz, 1H), 4.64 – 4.49 (m, 1H), 4.42 (dd,  $J$  = 6.1, 1.7 Hz, 1H), 3.71 (s, 3H), 3.08 (dd,  $J$  = 13.8, 5.8 Hz, 1H), 3.00 (dd,  $J$  = 13.8, 6.1 Hz, 1H) 1.41 (s, 9H). <sup>13</sup>C NMR (126 MHz, CDCl<sub>3</sub>)  $\delta$  172.4, 156.0, 155.2, 148.2, 130.8, 130.6, 117.2, 95.2, 80.1, 54.6, 52.4, 37.7, 28.4. HRMS (ESI)  $m/z$  calcd for C<sub>14</sub>H<sub>17</sub>O<sub>5</sub>N [M+H<sup>+</sup>]: 280.1185, found: 280.1190

### Synthesis of compound 1c<sup>[21]</sup>:

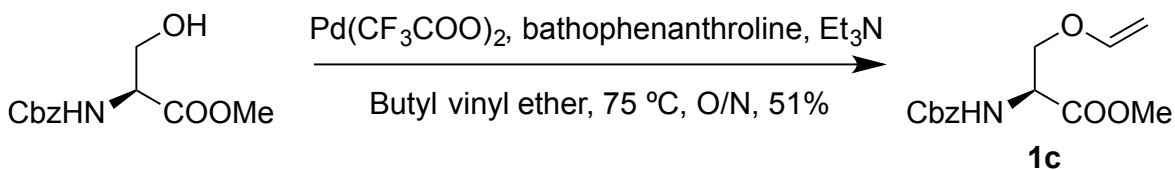

To a solution of palladium (II) trifluoroacetate (1.6 mg, 0.005 mmol) and bathophenanthroline (1.6 mg, 0.005 mmol) in n-butyl vinyl ether (2.6 mL) N-carbobenzoxy-L-serine methyl ester (253 mg, 1 mmol) and triethylamine (10  $\mu$ L, 0.075 mmol) were added and the reaction was stirred at 75 °C overnight. Then, the solvent was removed and the residue purified by column chromatography (petroleum ether/ethyl acetate 1:0 to 4:1) to afford compound 1c (141 mg, 0.51 mmol, 51%). <sup>1</sup>H NMR (500 MHz, CDCl<sub>3</sub>)  $\delta$  7.42 – 7.27 (m, 5H), 6.41 (dd,  $J$  = 14.3, 6.8 Hz, 1H), 5.62 (d,  $J$  = 8.8 Hz, 1H), 5.13 (s, 2H), 4.62 (dt,  $J$  = 8.7, 3.2 Hz, 1H), 4.20 (dd,  $J$  = 14.3, 2.6 Hz, 1H), 4.12 (dd,  $J$  = 9.9, 3.1 Hz, 1H), 4.06 (dd,  $J$  = 6.8, 2.5 Hz, 1H), 3.95 (dd,  $J$  = 9.9, 3.2 Hz, 1H), 3.78 (s, 3H). <sup>13</sup>C NMR (126 MHz, CDCl<sub>3</sub>)  $\delta$  170.3, 156.0, 151.2, 136.2, 128.7, 128.4, 128.2, 87.8, 67.8,

67.3, 53.8, 52.9. HRMS (ESI)  $m/z$  calcd for  $C_{14}H_{17}O_5N$   $[M+H]^+$ : 280.1185, found: 280.1190.

#### Synthesis of compound 1d:

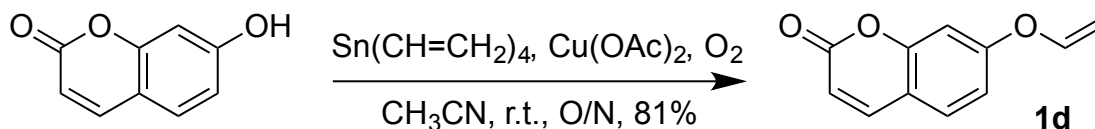

Following the general procedure A, compound 1d (153 mg, 0.814 mmol, 81%) was obtained from umbelliferone (162 mg, 1 mmol),  $\text{Cu}(\text{OAc})_2$  (218 mg, 1.2 mmol) and tetravinyltin (218  $\mu\text{L}$ , 1.2 mmol). The residue was purified by flash chromatography (petroleum ether/ethyl acetate 1:0 to 4:1).  $^1\text{H}$  NMR (400 MHz,  $\text{CDCl}_3$ )  $\delta$  7.65 (d,  $J = 9.5$  Hz, 1H), 7.42 (d,  $J = 8.9$  Hz, 1H), 6.96 – 6.88 (m, 2H), 6.65 (dd,  $J = 13.6, 6.0$  Hz, 1H), 6.29 (d,  $J = 9.5$  Hz, 1H), 4.93 (dd,  $J = 13.6, 1.9$  Hz, 1H), 4.63 (dd,  $J = 6.0, 1.9$  Hz, 1H).  $^{13}\text{C}$  NMR (101 MHz,  $\text{CDCl}_3$ )  $\delta$  160.8, 159.7, 155.6, 146.4, 143.2, 129.2, 114.4, 114.3, 113.8, 104.2, 98.4. HRMS (ESI)  $m/z$  calcd for  $C_{11}H_9O_3$   $[M+H]^+$ : 189.0546, found: 189.0541

#### Synthesis of compound 1e:

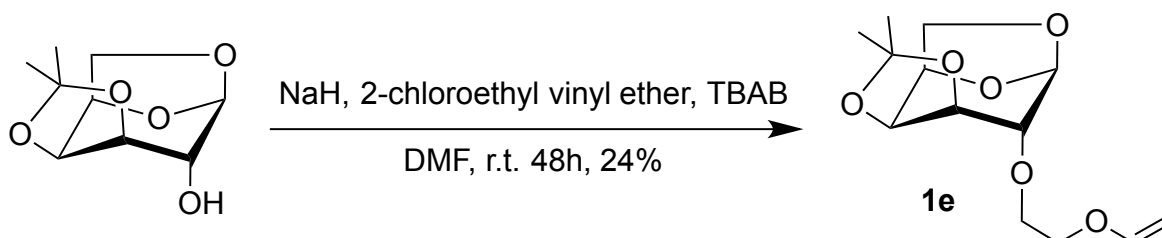

To a solution of 1,6-anhydro-3,4-di-O-isopropylidene- $\beta$ -D-galactopyranose (100 mg, 0.495 mmol) in anhydrous DMF (5 mL) at 0  $^\circ\text{C}$  under inert atmosphere, sodium hydride (60% in mineral oil, 82.8 mg, 2.48 mmol) was added. After 30 min, 2-chloroethylvinylether (252  $\mu\text{L}$ , 2.48 mmol) and tetrabutylammonium bromide (40.5 mg, 0.084 mmol) were added and the reaction was stirred for two days at room temperature. Then, 4 mL of water were added carefully and the mixture was concentrated under reduced pressure. The residue was dissolved in  $\text{CH}_2\text{Cl}_2$ , washed with brine three times, dried over anhydrous  $\text{MgSO}_4$  and concentrated under vacuum. The residue was purified by column chromatography (petroleum ether/ethyl acetate 2:1 to 0:1) to afford compound 1e (32 mg, 0.118 mmol, 24%).  $^1\text{H}$ -NMR (500 MHz,  $\text{CDCl}_3$ ):  $\delta$  = 6.48 (dd,  $J = 14.3, 6.8$  Hz, 1H,  $\text{CH}=\text{CH}_2$ ), 5.45 (s, 1H, H1), 4.50 (t,  $J = 5.7$  Hz, 1H, H5), 4.45 (t,  $J = 6.6$  Hz, 1H, H4), 4.22 –

4.19 (m, 2H, H3, CH=CH<sub>2</sub>), 4.08 (dd, *J* = 7.6, 1.0 Hz, 1H, H6a), 4.03 (dd, *J* = 6.8, 2.2 Hz, 1H, CH=CH<sub>2</sub>), 3.89 – 3.81 (m, 4H, CH<sub>2</sub>-CH<sub>2</sub>), 3.58 (dd, *J* = 7.4, 5.4 Hz, 1H, H6b), 3.55 – 3.54 (m, 1H, H2), 1.543 (s, 3H, CH<sub>3</sub>), 1.35 (s, 3H, CH<sub>3</sub>) ppm. <sup>13</sup>C-NMR (126 MHz, CDCl<sub>3</sub>): δ = 151.8 (CH=CH<sub>2</sub>), 108.7 (C(CH<sub>3</sub>)<sub>2</sub>), 99.8 (C1), 87.0 (CH=CH<sub>2</sub>), 78.9 (C2), 74.2 (C3), 72.2 (C5), 69.4 (C4), 69.1 (CH<sub>2</sub>-CH<sub>2</sub>), 67.3 (CH<sub>2</sub>-CH<sub>2</sub>), 63.2 (C6), 25.9 (CH<sub>3</sub>), 24.49 (CH<sub>3</sub>) ppm. HRMS (ESI) *m/z* calcd for C<sub>13</sub>H<sub>20</sub>O<sub>3</sub>Na [M+Na<sup>+</sup>]: 295.1152, found: 295.1149.

### Synthesis of compound 5:

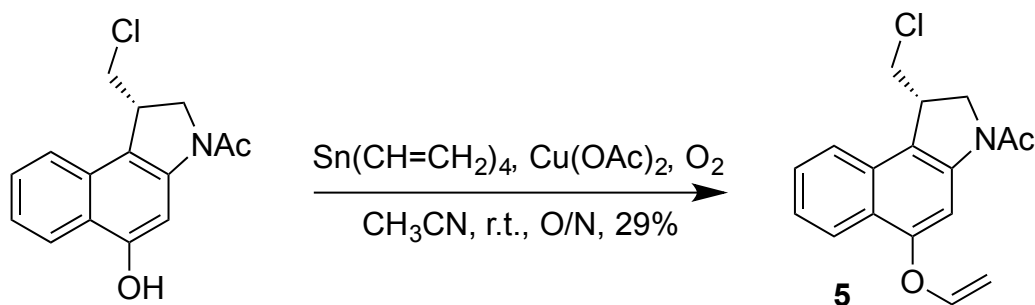

Following the general procedure A, compound 5 (33 mg, 0.120 mmol, 29%) was obtained from (S)-1-(1-(chloromethyl)-5-hydroxy-1,2-dihydro-3H-benzo[e]indol-3-yl)ethan-1-one<sup>[3]</sup> (114 mg, 0.415 mmol), Cu(OAc)<sub>2</sub> (90 mg, 0.497 mmol) and tetravinyltin (90 μL, 0.497 mmol). The residue was purified by flash chromatography (petroleum ether/ethyl acetate 7:3). <sup>1</sup>H NMR (400 MHz, CDCl<sub>3</sub>) δ 8.22 (d, *J* = 8.4 Hz, 1H), 8.16 (s, 1H), 7.67 (d, *J* = 8.3 Hz, 1H), 7.54 (t, *J* = 7.4 Hz, 1H), 7.41 (t, *J* = 7.5 Hz, 1H), 6.84 (dd, *J* = 13.6, 6.0 Hz, 1H), 4.94 (dd, *J* = 13.6, 1.7 Hz, 1H), 4.59 (dd, *J* = 5.9, 1.7 Hz, 1H), 4.32 – 4.20 (m, 2H), 4.05 (ddt, *J* = 10.6, 7.3, 3.5 Hz, 1H), 3.95 (dd, *J* = 11.3, 3.3 Hz, 1H), 3.45 (t, *J* = 10.8 Hz, 1H), 2.31 (s, 3H). <sup>13</sup>C NMR (101 MHz, CDCl<sub>3</sub>) δ 169.2, 154.2, 148.0, 141.5, 130.0, 128.0, 124.3, 123.5, 123.2, 122.2, 117.7, 102.4, 96.7, 54.1, 46.3, 42.5, 24.5. HRMS (ESI) *m/z* calcd for C<sub>17</sub>H<sub>17</sub>ClNO<sub>2</sub> [M+H<sup>+</sup>]: 302.0942, found: 302.0946

## Decaging reactions

### Decaging of compound 1a:

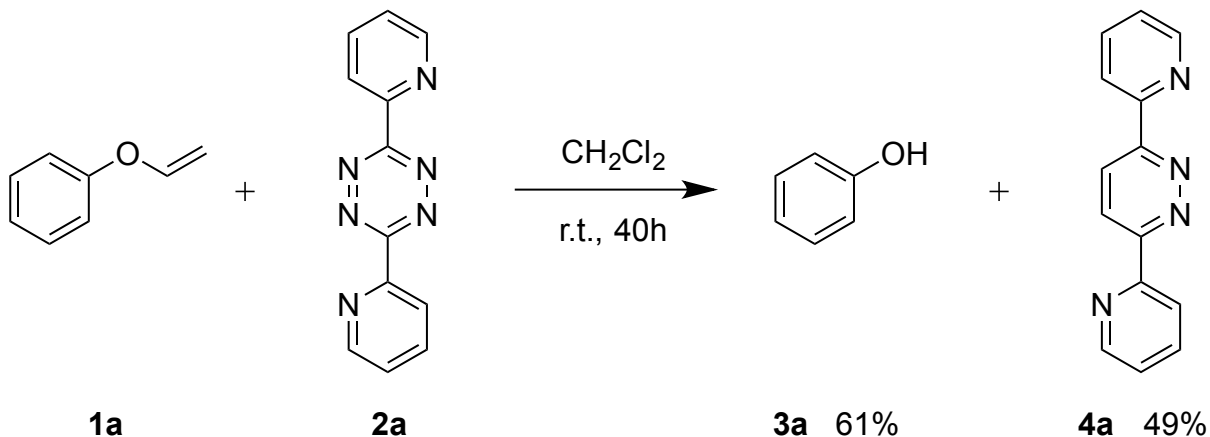

Following the general procedure B, phenyl vinyl ether 1a (20  $\mu\text{L}$ , 0.166 mmol) and 3,6-di-2-pyridyl-1,2,4,5-tetrazine 2a (78 mg, 0.499 mmol) were stirred in  $\text{CH}_2\text{Cl}_2$  (1.6 mL) for 40 h. The residue was purified by flash chromatography (petroleum ether/ethyl acetate 9:1) to afford phenol 3a (9.5 mg, 0.101 mmol, 61%) and 3,6-di(pyridin-2-yl)pyridazine 4a (19 mg, 0.081 mmol, 49%). Spectral data were in agreement with the previously reported in the literature.<sup>[4]</sup>  $^1\text{H}$  NMR for 4a (500 MHz,  $\text{CDCl}_3$ )  $\delta$  8.81 – 8.71 (m, 4H), 8.69 (s, 2H), 7.91 (td,  $J = 7.8, 1.8$  Hz, 2H), 7.41 (ddd,  $J = 7.5, 4.8, 1.2$  Hz, 2H).  $^{13}\text{C}$  NMR (126 MHz,  $\text{CDCl}_3$ )  $\delta$  158.3, 153.6, 149.6, 137.4, 125.3, 125.0, 121.9. HRMS (ESI)  $m/z$  calcd for  $\text{C}_{14}\text{H}_{11}\text{N}_4$   $[\text{M}+\text{H}^+]$ : 235.0984, found 235.0984

### Decaging of compound 1b:

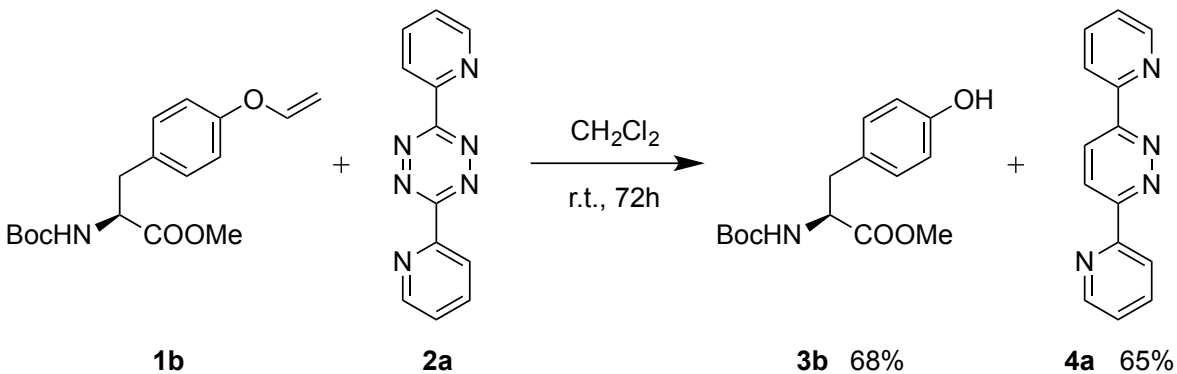

Following the general procedure B, O-vinyl-*N*-(*tert*-butoxycarbonyl)-L-tyrosine methyl

ester 1b (40 mg, 0.125 mmol) and 3,6-di-2-pyridyl-1,2,4,5-tetrazine 2a (59 mg, 0.25 mmol) were stirred in CH<sub>2</sub>Cl<sub>2</sub> (1.25 mL) for 72 h. The residue was purified by flash chromatography (petroleum ether/ethyl acetate 9:1 to 8:2) to afford starting material O-vinyl- *N*-(*tert*-butoxycarbonyl)-L-tyrosine methyl ester 1b (11 mg, 0.034 mmol, 27%), 3,6-di(pyridin-2-yl)pyridazine 4a (19 mg, 0.081 mmol, 65%) and *N*-(*tert*-butoxycarbonyl)-L-tyrosine methyl ester 3b (25 mg, 0.085 mg, 68%). <sup>1</sup>H NMR for 3b (400 MHz, CDCl<sub>3</sub>) δ 6.97 (d, *J* = 8.4 Hz, 2H), 6.73 (d, *J* = 8.4 Hz, 2H), 4.99 (d, *J* = 8.4 Hz, 1H), 4.54 (m, 1H), 3.71 (s, 3H), 3.03 (dd, *J* = 13.9, 5.7 Hz, 1H), 2.96 (dd, *J* = 14.1, 6.1 Hz, 1H) 1.42 (s, 9H). <sup>13</sup>C NMR (101 MHz, CDCl<sub>3</sub>) δ 172.7, 155.4, 155.0, 130.5, 127.9, 115.6, 80.3, 54.7, 52.4, 37.7, 28.4. HRMS (ESI) *m/z* calcd for C<sub>15</sub>H<sub>20</sub>NO<sub>5</sub> [M-H<sup>-</sup>]: 294.1347, found: 294.1346.

### Decaging of compound 1c:

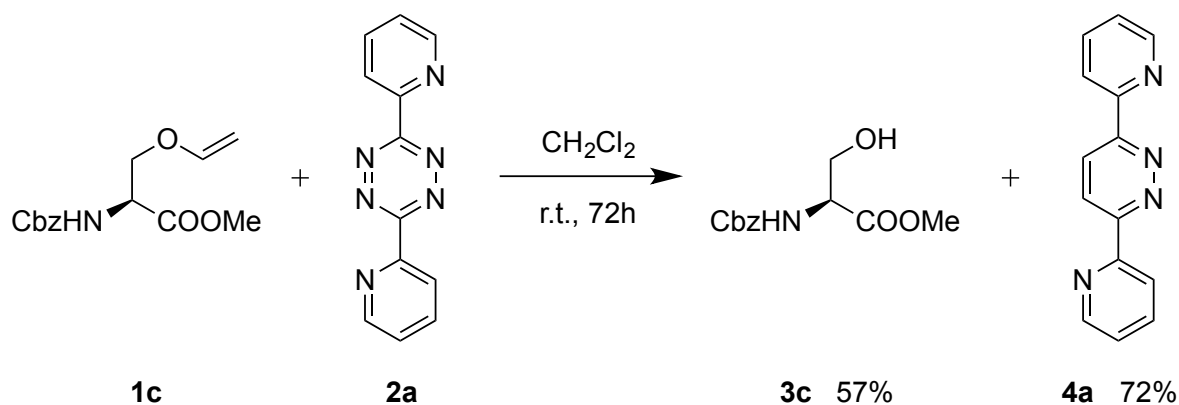

Following the general procedure B, O-vinyl-*N*-carbobenzoxy-L-serine methyl ester 1c (25 mg, 0.089 mmol) and 3,6-di-2-pyridyl-1,2,4,5-tetrazine 2a (42 mg, 0.179 mmol) were stirred in CH<sub>2</sub>Cl<sub>2</sub> (0.9 mL) for 72 h. The residue was purified by flash chromatography (petroleum ether/ethyl acetate 9:1 to 8:2) to afford *N*-carbobenzoxy-L-serine methyl ester 3c (13 mg, 0.051 mmol, 57%) and 3,6-di(pyridin-2-yl)pyridazine 4a (15 mg, 0.064 mmol, 72%). <sup>1</sup>H NMR for 3c (400 MHz, CDCl<sub>3</sub>) δ 7.41 – 7.29 (m, 5H), 5.71 (d, *J* = 7.7 Hz, 1H), 5.13 (s, 2H), 4.50 – 4.40 (m, 1H), 4.01 (dd, *J* = 11.2, 3.7 Hz, 1H), 3.93 (dd, *J* = 11.3, 3.5 Hz, 1H), 3.79 (s, 3H). <sup>13</sup>C NMR (101 MHz, CDCl<sub>3</sub>) δ 171.0, 156.3, 136.2, 128.7, 128.4, 128.3, 67.4, 63.5, 56.2, 52.9. HRMS (ESI) *m/z* calcd for C<sub>12</sub>H<sub>15</sub>NO<sub>5</sub>Na [M+Na<sup>+</sup>]: 276.0848, found: 276.0851



### Decaging of compound 1d:

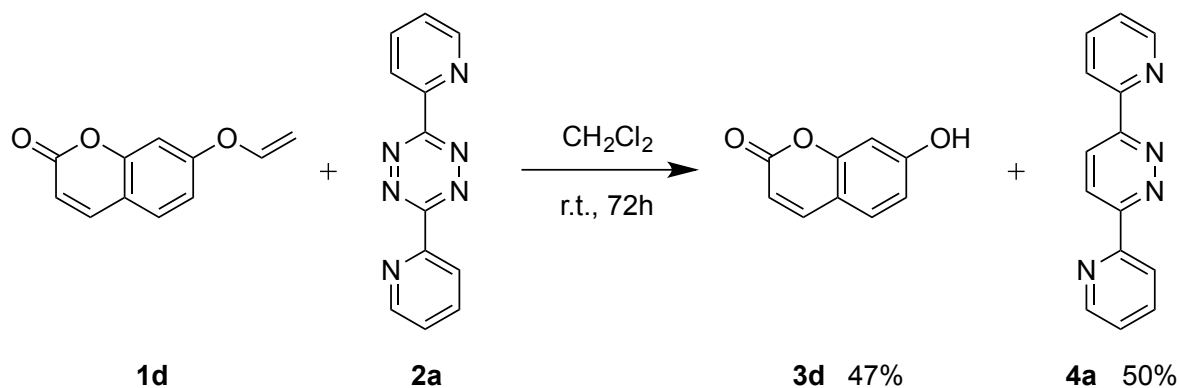

Following the general procedure B, 7-(vinylloxy)-2*H*-chromen-2-one **1d** (30 mg, 0.160 mmol) and 3,6-di-2-pyridyl-1,2,4,5-tetrazine (75 mg, 0.319 mmol) were stirred in  $\text{CH}_2\text{Cl}_2$  (1.6 mL) for 72 h. The residue was purified by flash chromatography (petroleum ether/ethyl acetate 9:1 to 8:2) to afford starting material 7-(vinylloxy)-2*H*-chromen-2-one **1d** (13 mg, 0.07 mmol, 44%), 3,6-di(pyridin-2-yl)pyridazine **4a** (17 mg, 0.075 mmol, 47%) and 7-hydroxy-2*H*-chromen-2-one **3d** (13 mg, 0.080 mmol, 50%).  $^1\text{H}$  NMR for **3d** (500 MHz, MeOD)  $\delta$  7.84 (d,  $J = 9.4$  Hz, 1H), 7.44 (d,  $J = 8.5$  Hz, 1H), 6.79 (dd,  $J = 8.5, 2.3$  Hz, 1H), 6.70 (d,  $J = 2.2$  Hz, 1H), 6.18 (d,  $J = 9.5$  Hz, 1H).  $^{13}\text{C}$  NMR (126 MHz, MeOD)  $\delta$  163.7, 163.1, 157.2, 146.1, 130.7, 114.5, 113.1, 112.3, 103.4. HRMS (ESI)  $m/z$  calcd for  $\text{C}_9\text{H}_6\text{O}_3\text{Na}$  [ $\text{M}+\text{Na}^+$ ]: 185.0209, found: 185.0201.

### Decaging of compound 1e:

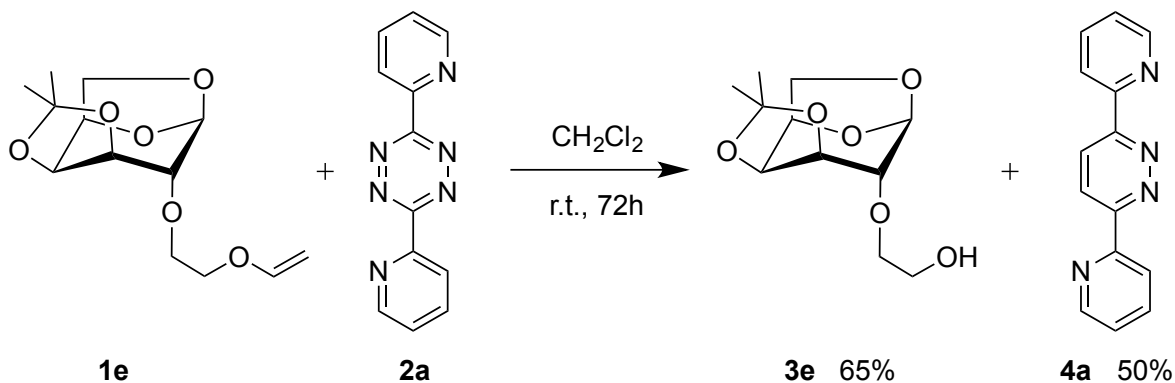

Following the general procedure B, compound **1e** (13 mg, 0.048 mmol) and 3,6-di-2-pyridyl-1,2,4,5-tetrazine **2a** (23 mg, 0.096 mmol) were stirred in  $\text{CH}_2\text{Cl}_2$  (1 mL) for 72 h. The residue was purified by flash chromatography (petroleum ether/ethyl acetate 1:2) to afford compound **3e** (7.7 mg, 0.031 mmol, 65%) and 3,6-di(pyridin-2-yl)pyridazine **4a** (5.6

mg, 0.024 mmol, 50%).  $^1\text{H-NMR}$  (400 MHz,  $\text{CDCl}_3$ )  $\delta$  = 5.45 (s, 1H, H1), 4.52 (t,  $J$  = 5.7 Hz, 1H, H5), 4.45 (t,  $J$  = 6.7 Hz, 1H, H4), 4.20 (d,  $J$  = 7.3 Hz, 1H, H3), 4.09 (d,  $J$  = 7.6 Hz, 1H, H6a), 3.82 – 3.67 (m, 4H,  $\text{CH}_2\text{-CH}_2$ ), 3.59 (dd,  $J$  = 7.6, 5.3 Hz, 1H, H6b), 3.52 (s, 1H, H2), 1.53 (s, 3H,  $\text{CH}_3$ ), 1.36 (s, 3H,  $\text{CH}_3$ ) ppm.  $^{13}\text{C-NMR}$  (101 MHz,  $\text{CDCl}_3$ )  $\delta$  = 108.8 ( $\text{C}(\text{CH}_3)_2$ ), 99.7 (C1), 78.7 (C2), 74.0 (C3), 72.2 (C5), 71.6 ( $\text{CH}_2\text{-CH}_2$ ), 69.4 (C4), 63.2 (C6), 61.9 ( $\text{CH}_2\text{-CH}_2$ ), 25.9 ( $\text{CH}_3$ ), 24.5 ( $\text{CH}_3$ ) ppm. HRMS (ESI)  $m/z$  calcd for  $\text{C}_{11}\text{H}_{18}\text{O}_6\text{Na}$  [ $\text{M}+\text{Na}^+$ ]: 269.1001, found: 269.1160

### Synthesis of tetrazine 2c

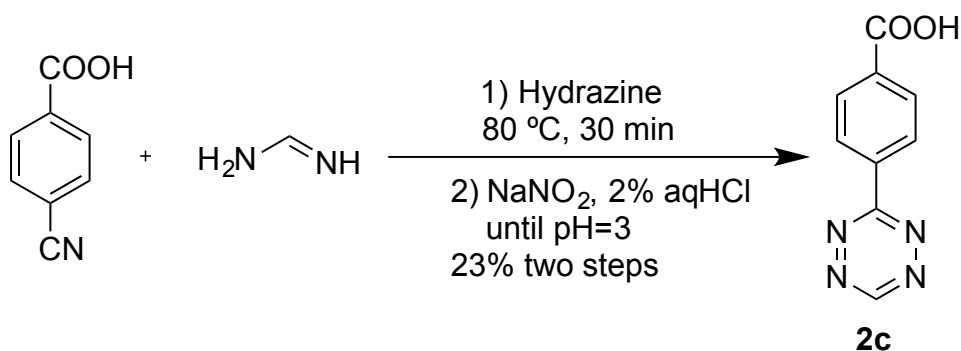

Hydrazine hydrate (4 mL) was added under inert atmosphere dropwise to a mixture of 4-cyanobenzoic acid (600 mg, 4 mmol) and formamidine acetate (2122 mg, 20.4 mmol). The reaction was then stirred at 80 C for 30 min and allowed to cool to room temperature. Sodium nitrite (1408 mg, 20.4 mmol) in water (4 mL) was added to the reaction mixture followed by the dropwise addition of of 2% aqueous HCl until the pH of the solution was approximately 3 and a pink precipate was formed. The precipitate was then filtered and washed with 2% aqueous HCl. The crude was finally purified by flash chromatography ( $\text{CH}_2\text{Cl}_2/\text{CH}_3\text{OH}$  2% to 10%) to afford compound 2c (186 mg, 0.92 mmol, 23%)  $^1\text{H NMR}$  (400 MHz,  $\text{DMSO-}d_6$ )  $\delta$  10.65 (s, 1H), 8.66 – 8.55 (m, 2H), 8.27 – 8.17 (m, 2H).  $^{13}\text{C NMR}$  (101 MHz,  $\text{DMSO}$ )  $\delta$  166.8, 165.1, 158.3, 135.6, 134.7, 130.2, 128.0. HRMS (ESI)  $m/z$  calcd for  $\text{C}_9\text{H}_7\text{N}_4\text{O}_2$  [ $\text{M}+\text{H}^+$ ]: 203.0569, found: 203.0567

## 2. DETERMINATION OF KINETIC RATE CONSTANTS:

Rate constants were determined under pseudo-first order conditions. Stocks solutions of 10% H<sub>2</sub>O in DMF were prepared for each tetrazine (2 mM), compound **1a** (300 to 700 mM) and 5-norbonen-2-ol (40 to 200 mM). In a similar way, stock solutions in 40 or 60% H<sub>2</sub>O/DMF were prepared for **1a** (150 mM to 350 mM) and tetrazine **2c** (2 mM). Mixing equal volumes of the stocks solutions resulted in final concentrations of 1 mM of the tetrazine and 150 to 350 mM of the phenyl vinyl ether **1a** in 10% H<sub>2</sub>O/DMF, 75 to 175 mM in 40 or 60% H<sub>2</sub>O/DMF or 20 to 100 mM of the 5-norbonen-2-ol. The decay of the UV absorption of the tetrazine at the corresponding wavelength was followed over time at 37°C with a Cari 100 instrument from Varian and the data were fit to a single exponential decay equation. Each measurement was carried out three different times. The resulted values for  $k_{\text{obs}}$  were then plotted against the coumarin vinyl ether concentrations and fitted to a linear equation to obtain the second order constant  $k$  from the slop. The results obtained in 60% H<sub>2</sub>O/DMF were not fully reliable due to the poor solubility of the compounds in this solvent system.

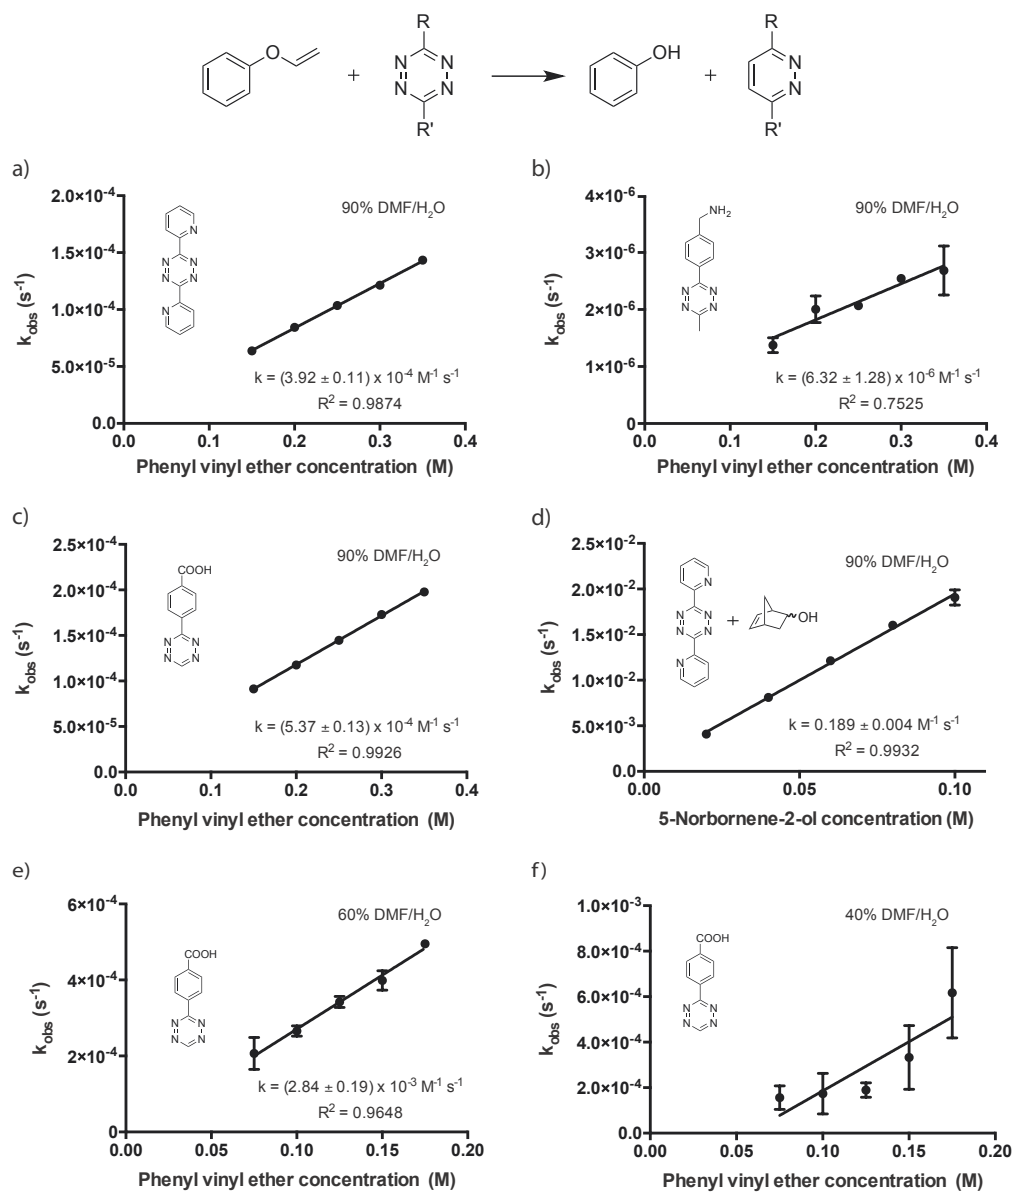

**Figure S1:** Rate constants  $k$  obtained from plots of observed rate  $k_{\text{obs}}$  versus compound **1a** or 5-norbornene-2-ol concentration for various tetrazines (**2a–2c**).

### 3. STABILITY STUDIES

The assesment of the stability of the compounds **1b–d** and **5** in PBS was performed at 37°C. Stock solutions in acetonitrile (20 mM for compounds **1b–d** and 10 mM for drug) were diluted in PBS to a final concentration of 200  $\mu\text{M}$  for compounds **1b–d** and 100  $\mu\text{M}$  for compound **5**. Acetophenone was used as internal stardard. Stock solution of

acetophenone in acetonitrile (20 mM) was added to the samples to a final concentration of 200  $\mu$ M. The solutions were kept at 37 °C and analyzed at different times by HPLC/UV analysis. The assesment of the stability of compound **1a** was performed with a solution 20 mM in 10% H<sub>2</sub>O/DMF at 37°C. This solution was diluted to 200  $\mu$ M with H<sub>2</sub>O at different times and analyzed by HPLC/UV. The stability of the compound **5** was also assessed with solutions 200  $\mu$ M in 50% DMF/H<sub>2</sub>O and DMF. These solutions were analyzed at different times by HPLC/UV. The stability of compound **1e** could not be performed due to its lack of UV absorbance. The HPLC/UV analysis was performed on a Agilent 1100 series instrument with  $\mu$ Bondapak C18 column (125Å, 10  $\mu$ m, 3.9 mm X 150 mm). The mobile phase consisted of acetonitrile and water. The samples were eluted with a linear gradient (13 minutes 0-50% ACN and 1.5 min 50-100% ACN, 0.1% TFA, 0.75 mL/mmol). Retention times: **acetophenone**: 5.137-5.576; **1a**: 5.809-5.879; **1b**: 9.863-10.219; **1c**: 6.904-7.206; **1d**: 7.041-7.220; **5**: 9.501-10.293.

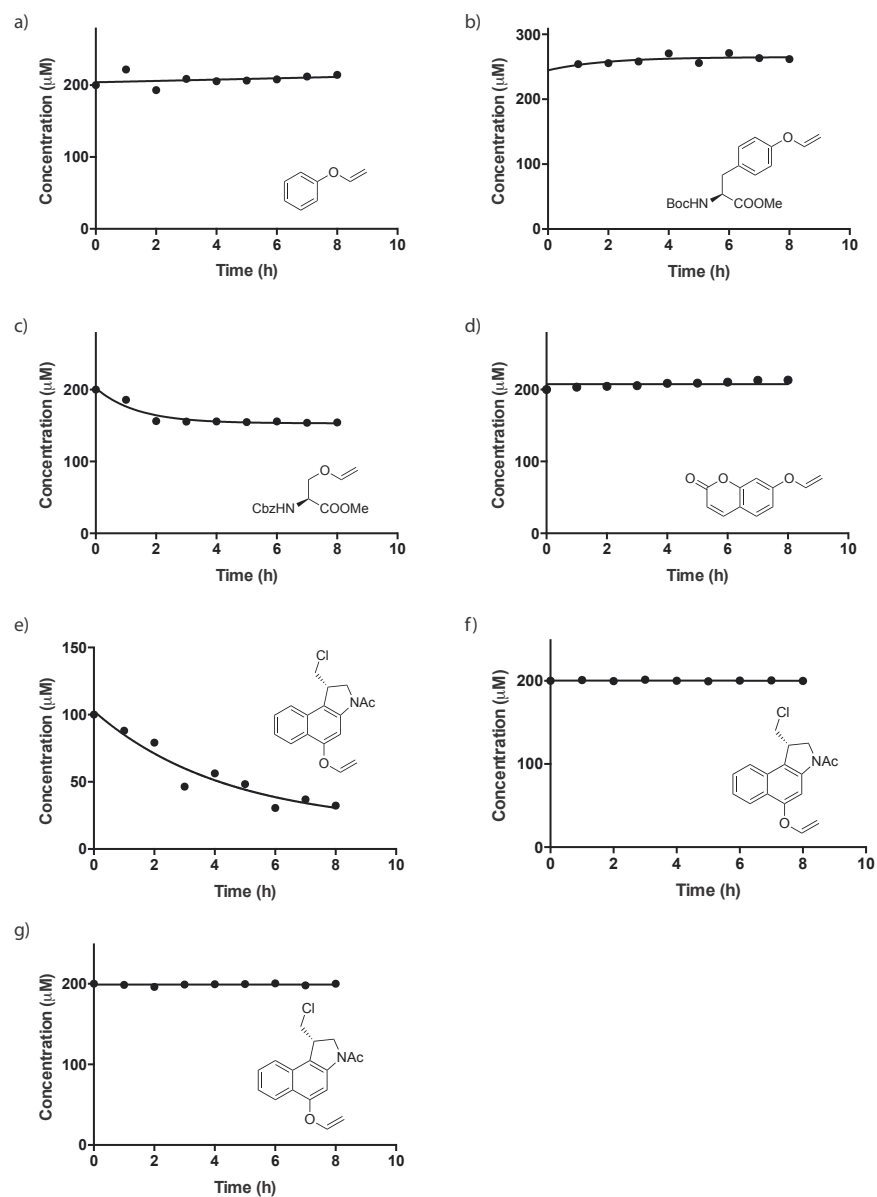

**Figure S2:** Stability studies performed at 37 °C and analyzed at different times by HPLC/UV; a) the stability of compound **1a** was assessed with a solution 20 mM in 10% H<sub>2</sub>O/DMF; b-d) the stability of compounds **1b–d** was assessed with solutions 200 µM in PBS; e) the stability of compound **5** was assessed with a solution 100 µM in PBS; f) the stability of compound **5** was assessed with a solution 200 µM in 50% H<sub>2</sub>O/DMF; g) the stability of compound **5** was assessed with a solution 200 µM in DMF.

#### 4. RELEASE STUDIES BY <sup>1</sup>H-NMR

Stock solutions of 1a (81.4 mM, CD<sub>3</sub>CN), tetrazine 2a (7.3 mM CD<sub>3</sub>CN) and dimethylformamide (129 mM CD<sub>3</sub>CN, internal reference) were diluted in a mixture 10% D<sub>2</sub>O in CD<sub>3</sub>CN to final concentrations of 3 mM for 1a and 2a and 2 mM for DMF. The reaction was allowed to proceed at room temperature and was monitored by <sup>1</sup>H NMR at different times.

#### 5. RELEASE STUDIES OF COMPOUND 5 BY HPLC:

Compound 5 was diluted in PBS pH=7.4 to a final concentration of 100 μM from 10 mM stock in acetonitrile. Then tetrazine 4c was added to a final concentration of 500 μM from a 50 mM stock in DMSO. The reaction was performed at 37 C and monitored by HPLC/UV detection at different times. The HPLC/UV analysis was performed on a Agilent 1100 series instrument with μBondapak C18 column (125Å, 10 μm, 3.9 mm X 150 mm). The mobile phase consisted of acetonitrile and water. The samples were eluted with a linear gradient (13 minutes 0-50% ACN and 1.5 min 50-100% ACN, 0.1% TFA, 0.75 mL/mmol). Retention times: 2c: 4.455-4.692; 4c: 5.275-5.375; 5: 9.963-10.230; 6: 7.851-8.064; 7: 7.263-7.329.

**HPLC at 0h:**

Print of window 38: Current Chromatogram(s)

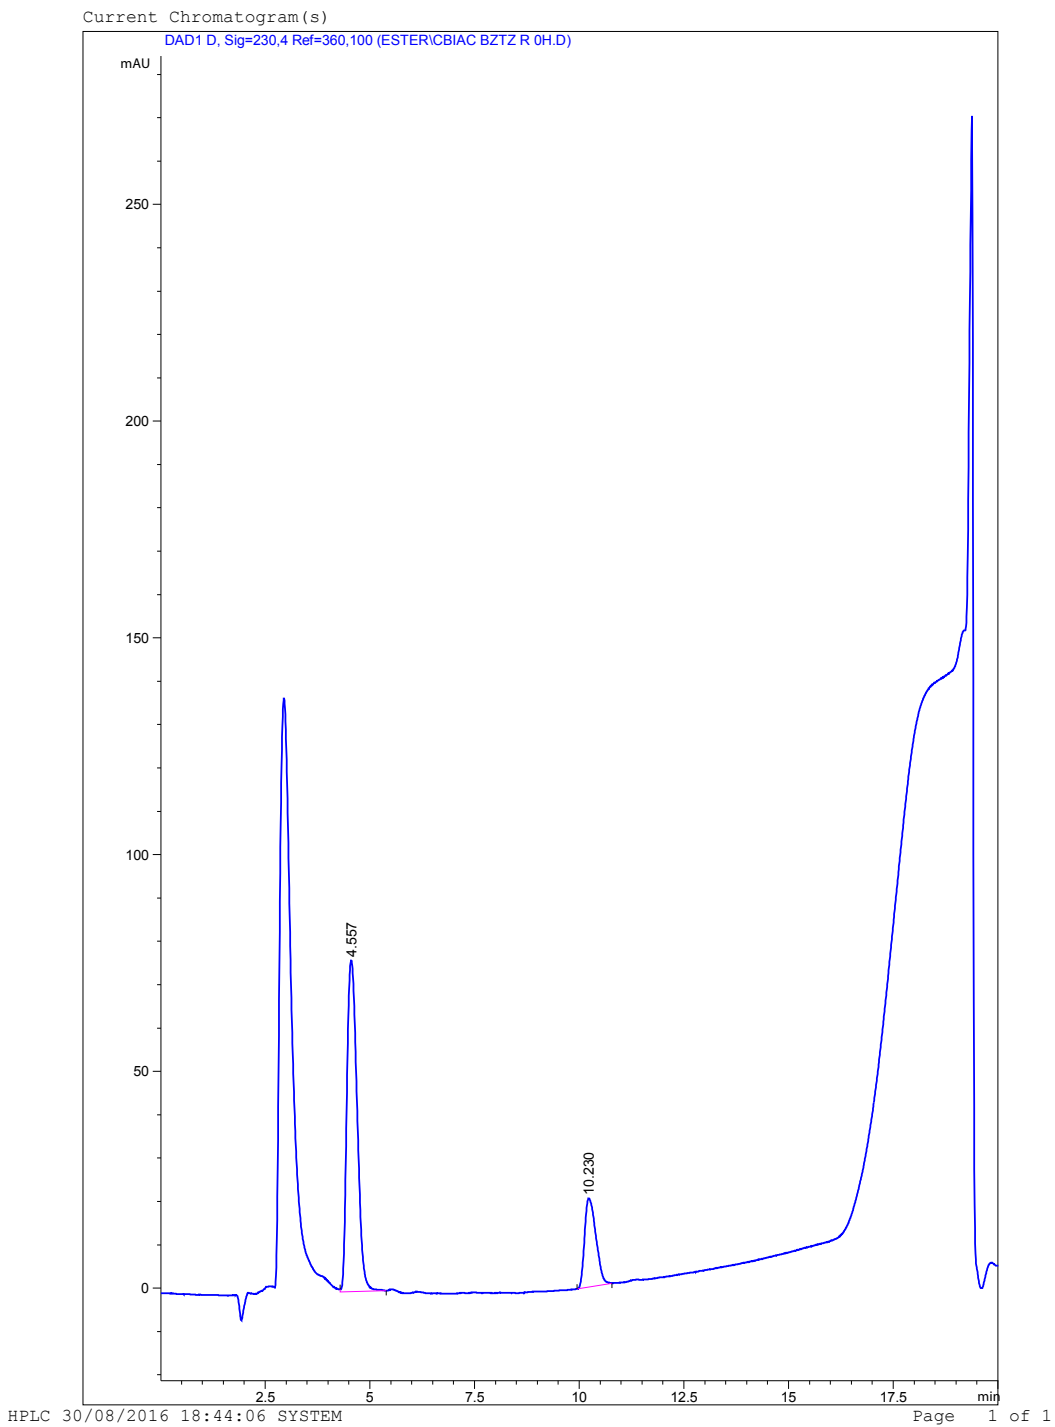



**HPLC at 1.5h:**

Print of window 38: Current Chromatogram(s)

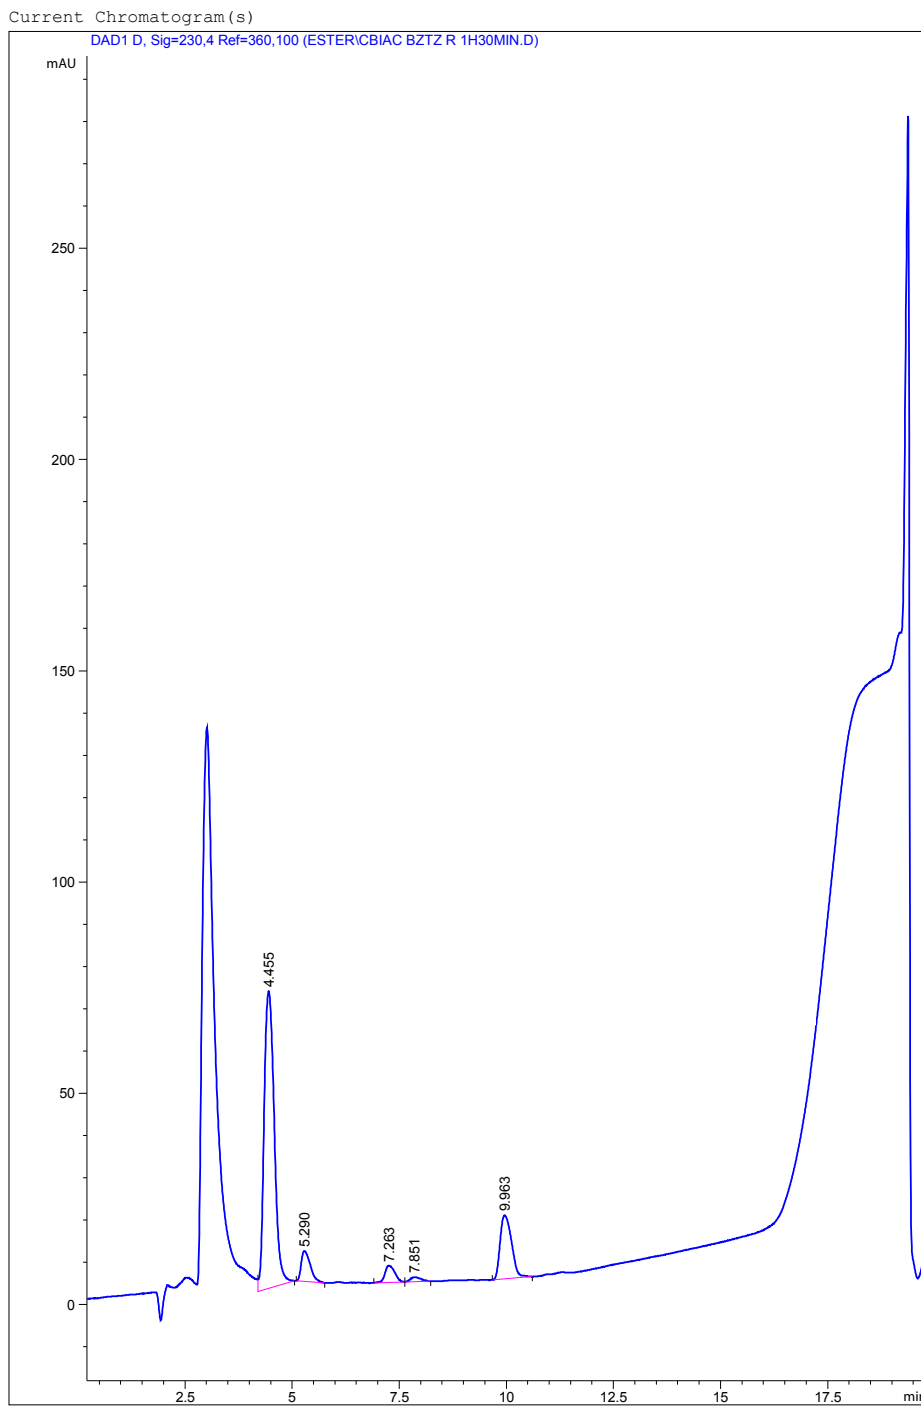

HPLC 30/08/2016 17:07:48 SYSTEM

Page 1 of 1

# HPLC at 3h:

Print of window 38: Current Chromatogram(s)

Current Chromatogram(s)

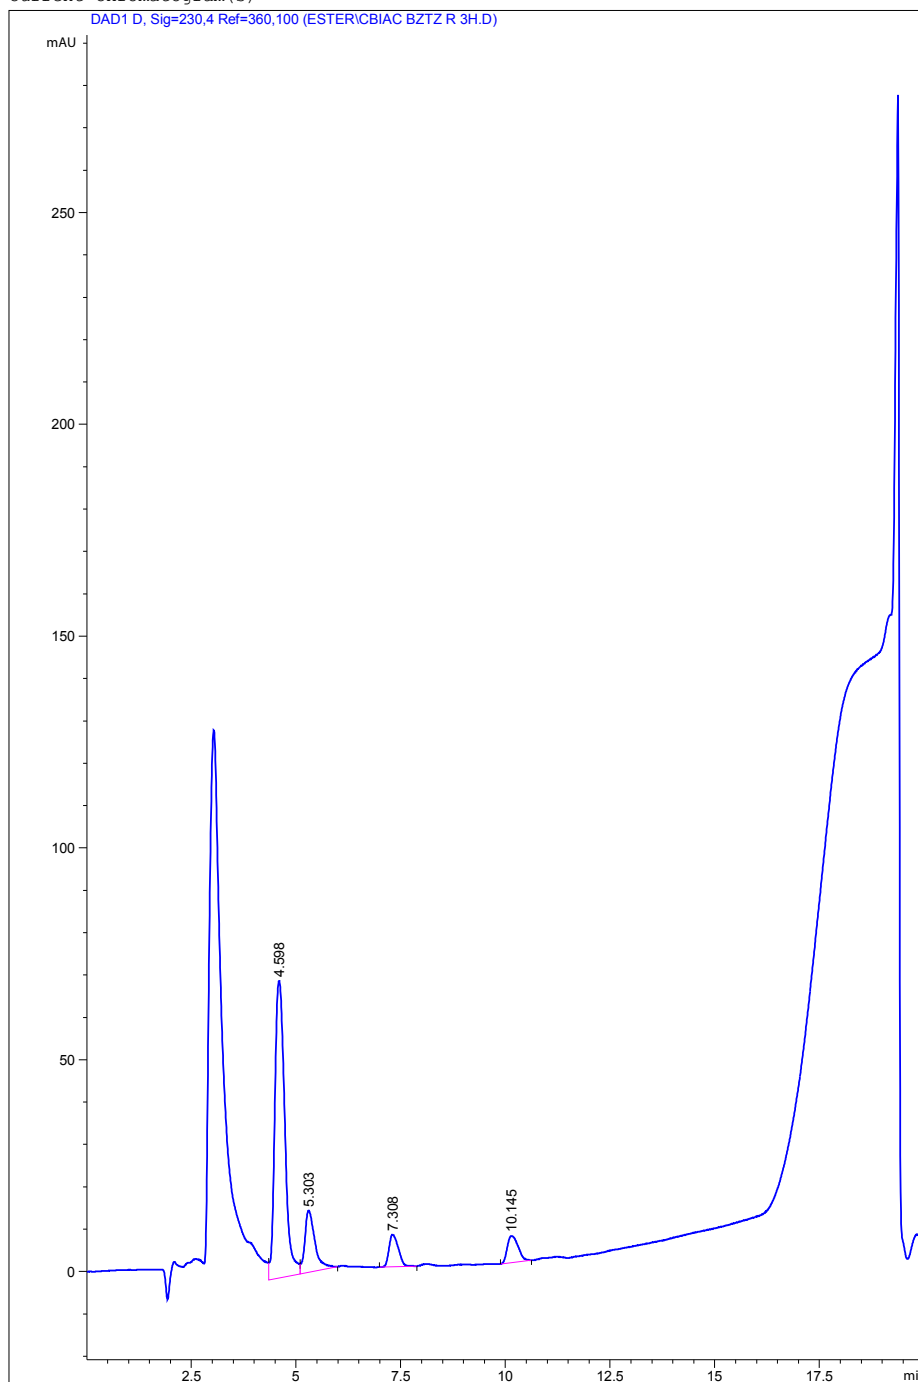

HPLC 30/08/2016 17:11:33 SYSTEM

Page 1 of 1

LC/MS for Compound 4c: m/z for C<sub>11</sub>H<sub>7</sub>N<sub>4</sub>O<sub>2</sub> [M-H]<sup>-</sup> calc: 199.1, found: 199.3

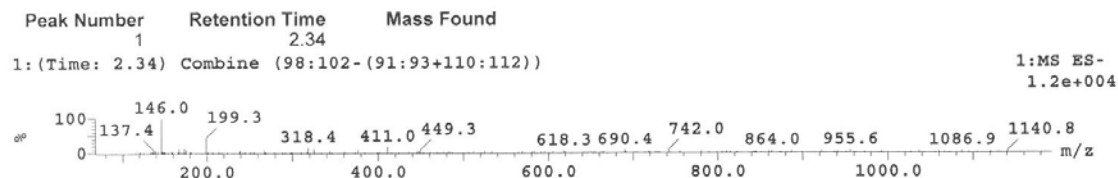

LC/MS for Compound 2c: m/z for C<sub>9</sub>H<sub>5</sub>N<sub>4</sub>O<sub>2</sub> [M-H]<sup>-</sup> calc: 201.0, found: 201.3

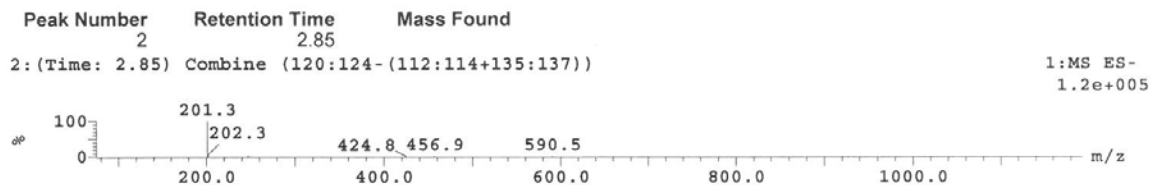

LC/MS for compound 7: m/z for C<sub>15</sub>H<sub>14</sub>NO<sub>2</sub> [M+H]<sup>+</sup>: calc: 240.1, found: 240.2

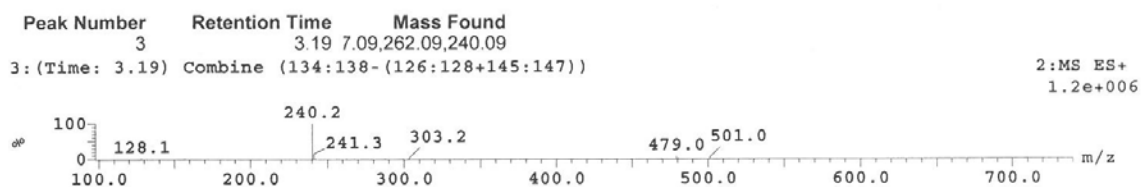

# HPLC at 7h:

Print of window 38: Current Chromatogram(s)

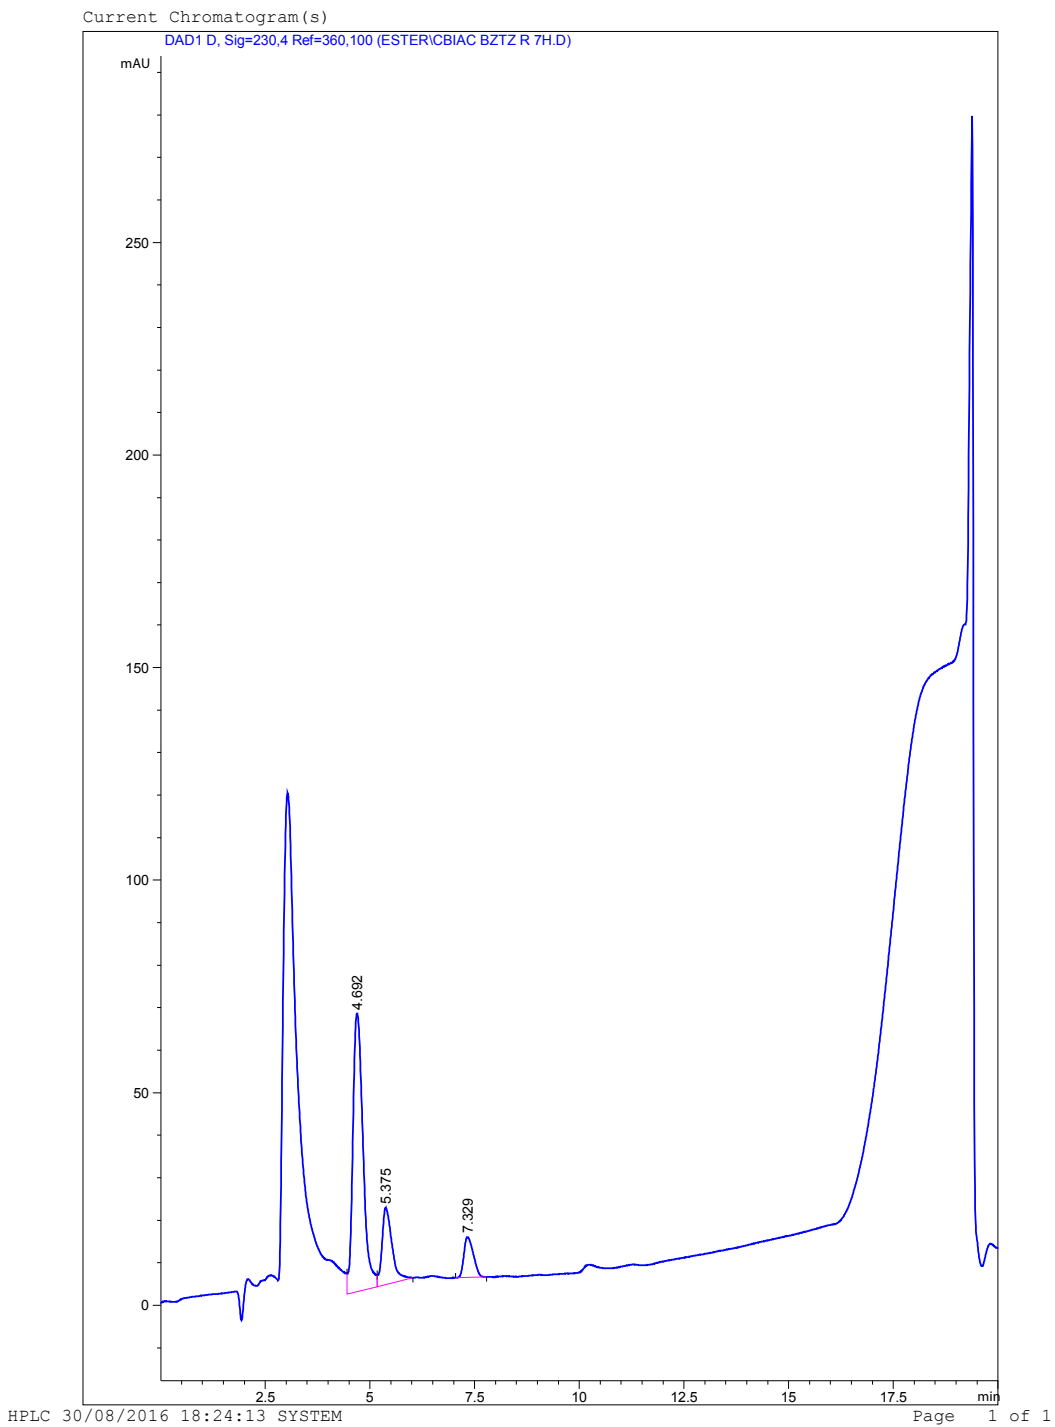

6. **TABLE S1:** Examples of FDA approved alcohol-containing drugs (cf DrugBank v5.0).

| Structure                                                                           | Name        |
|-------------------------------------------------------------------------------------|-------------|
| 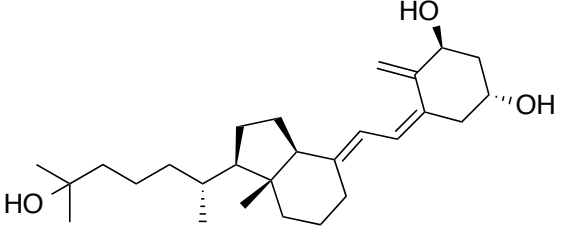   | Calcitriol  |
|    | Tramadol    |
|   | Venlafaxine |
|  | Floxuridine |
|  | Pentostatin |
|  | Simvastatin |

|                                                                                    |             |
|------------------------------------------------------------------------------------|-------------|
| 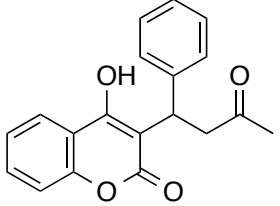  | Warfarin    |
|   | Etoposide   |
|   | Saxagliptin |
|  | Triclosan   |

## 7. IN VIVO DECAGING METHODS

### Cell culture

A549 (ATCC<sup>®</sup> CCL-185<sup>™</sup>) and HepG2 (ATCC<sup>®</sup> HB-8065<sup>™</sup>) cells were routinely grown in a humidified incubator at 37 °C under 5% CO<sub>2</sub>, and split before reaching confluence using TrypLE<sup>™</sup> Express. Both cell lines were grown on DMEM medium supplemented with 10% heat-inactivated FBS, 2 mM GlutaMAX<sup>™</sup>, 10 mM HEPES, 1% NEAA, 1 mM sodium pyruvate, 100 units/mL penicillin and 100 µg/mL streptomycin. All reagents were bought from Gibco, Life Technologies (USA), unless otherwise stated.

### Cytotoxicity and estimation of IC<sub>50</sub>s in HepG2 and A549 cells

Cytotoxicity of coumarin **1d**, tetrazine **2c**, double prodrug **5** and drug **7** was assessed using a CellTiter-Blue<sup>®</sup> Cell Viability Assay (Promega, USA), a fluorescent dye approach based on the ability of metabolically active cells to convert the dye resazurin to the fluorescent resorufin product. Briefly, cells were seeded at a concentration of 10 000 cells/well (100

$\mu\text{L}$ ) in flat-bottom 96 well-plates and allowed to adhere and adapt to the plates for 24 h. At this point, culture medium was exchanged to complete medium supplemented with increasing concentrations of each compound in technical triplicates (for coumarin **1d**: 1, 10, 25, 50, 100, 150 and 200  $\mu\text{M}$ ; for other compounds: 0.01, 0.1, 0.5, 1, 10, 25 and 50  $\mu\text{M}$ ). Plates were incubated for 46 h 30 min, at which time cell viability was assessed by exchanging the culture medium to medium supplemented with CellTiter-Blue Reagent (dilution 1:20 from commercial stock) and incubated for another 1 h 30 min, before analysis of fluorescence on an Infinite M200 (Tecan, USA) plate-reader ( $\lambda_{\text{exc}}=530$ ,  $\lambda_{\text{em}}=590$ ). Relative fluorescence units (R.L.U.) were normalized to the values obtained for the appropriate vehicle controls. Results are shown as average of 3 independent experiments. A sigmoidal curve (variable slope) was fitted to each dataset, using GraphPad Prism v5 software, and used to calculate the half maximal inhibitory concentration ( $\text{IC}_{50}$ ) for each compound on both cell-lines.

#### **Detection of decaging of coumarin by tetrazine 2c inside HepG2 cells by confocal microscopy**

Cells were seeded at a concentration of 30 000 cells/well (300  $\mu\text{l}$ ) in 8 well IbidiTreat microslides (Ibidi, USA) and allowed to adhere and adapt to the plates for 24 h. At this point, culture medium was exchanged to complete medium supplemented with coumarin **1d** at 25  $\mu\text{M}$ , and cells were incubated for 5 h. Medium was then exchanged to medium supplemented with tetrazine **2c** 10  $\mu\text{M}$ , and cells were incubated for another 4 h. Cells were washed with PBS pH 7.4 and incubated at RT for 15 min with 2.5  $\mu\text{M}$  Syto61 (LifeTechnologies, USA), before being washed again with PBS pH 7.4, and the medium was replaced with complete medium without phenol-red. Cells were observed using a LSM710 confocal microscope (Zeiss, Germany), equipped with a Diode 405/30 nm (decaged, fluorescent coumarin) and a HeNe633 nm (Syto61) laser units. Fluorescence was detected at 409-565 nm (decaged, fluorescent coumarin) and at 638–797 nm (Syto61) and representative pictures were taken within 1 h after removal of Syto61. Images were then processed using ImageJ 1.49v software, to remove background noise (display range set to 30–255; 8 bit/pixel images) and overlay of the scale bar.

### Detection of decaging of the prodrug by tetrazine 2c inside HepG2 and A549 cells by assessment of cytotoxicity

Cells were seeded as described above to assess cytotoxicity and estimate  $IC_{50}$ s in HepG2 and A549 cells and allowed to adapt to the plates for 24 h. Cells were incubated with increasing concentrations of double prodrug **5** or equivalent vehicle controls for another 24 h. The culture medium was then exchanged to complete medium supplemented with increasing concentrations of tetrazine **2c**, drug **7** or equivalent vehicle controls. Cells were incubated for another 46 h 30 min until proceeding with the CellTiter-Blue Cell Viability Assay (Promega, USA), as described above. Relative fluorescence units (R.L.U.) were normalized to the values obtained for the appropriate vehicle controls. Bars represent the average of 3 independent experiments and error bars represent SEM.

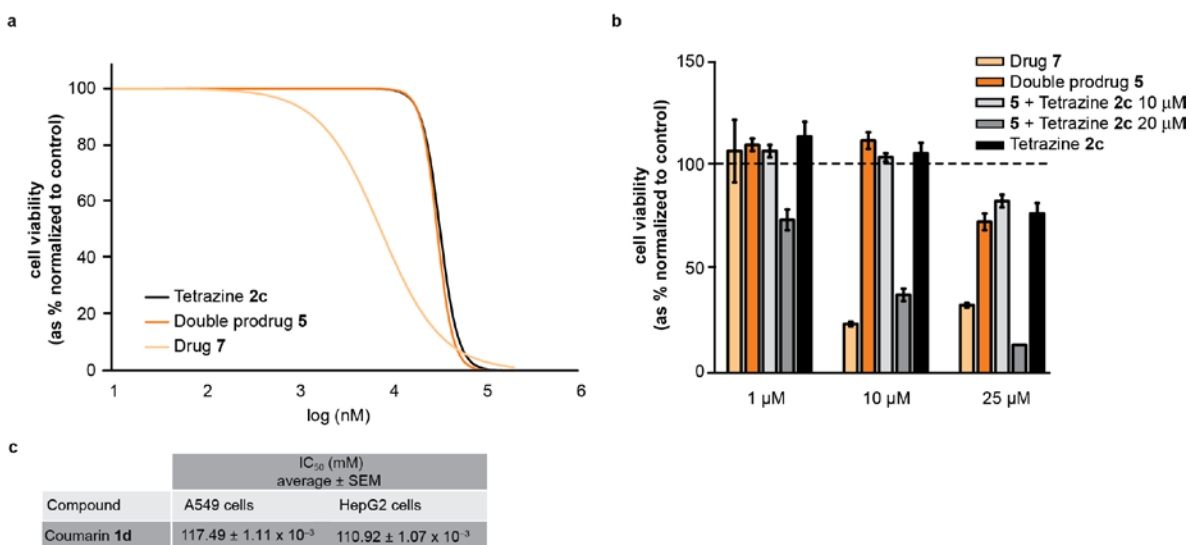

**Figure S3:** a) Cytotoxicity dose-response curves of tetrazine **2c**, double prodrug **5** and drug **7** in HepG2 cells, obtained after 46.5 h of exposure. b) Cytotoxic effects of activation of the double prodrug **5** by tetrazine **2c** inside HepG2 cells. c)  $IC_{50}$  values of coumarin in A549 and HepG2 cells.



## 8. COMPUTATIONAL DETAILS.

Full geometry optimizations were carried out with Gaussian 09<sup>[5]</sup> using the M06-2X hybrid functional<sup>[6]</sup> and 6-31+G(d,p) basis set. Bulk solvent effects in water were considered implicitly through the IEF-PCM polarizable continuum model.<sup>[7]</sup> The possibility of different conformations was taken into account for all structures. Frequency analyses were carried out at the same level used in the geometry optimizations, and the nature of the stationary points was determined in each case according to the appropriate number of negative eigenvalues of the Hessian matrix. . The quasiharmonic approximation reported by Trular et al. was used to replace the harmonic oscillator approximation for the calculation of the vibrational contribution to enthalpy and entropy.<sup>[8]</sup> Scaled frequencies were not considered. Scaled frequencies were not considered. Mass-weighted intrinsic reaction coordinate (IRC) calculations were carried out by using the Gonzalez and Schlegel scheme<sup>[9]</sup> in order to ensure that the TSs indeed connected the appropriate reactants and products. Gibbs free energies ( $\Delta G$ ) were used for the discussion on the relative stabilities of the considered structures. Free energies calculated using the gas phase standard state concentration (1 atm = 1/24.5 M) were converted to reproduce the standard state concentration in solution (1 M) by adding or subtracting 1.89 kcal mol<sup>-1</sup> for bimolecular additions and decompositions, respectively. Cartesian coordinates, electronic energies, entropies, enthalpies, Gibbs free energies, and lowest frequencies of the calculated structures are available below.

**Figure S4:** Minimum energy pathway (MEP) calculated with PCM(H<sub>2</sub>O)/M06-2X/6-31+G(d,p)

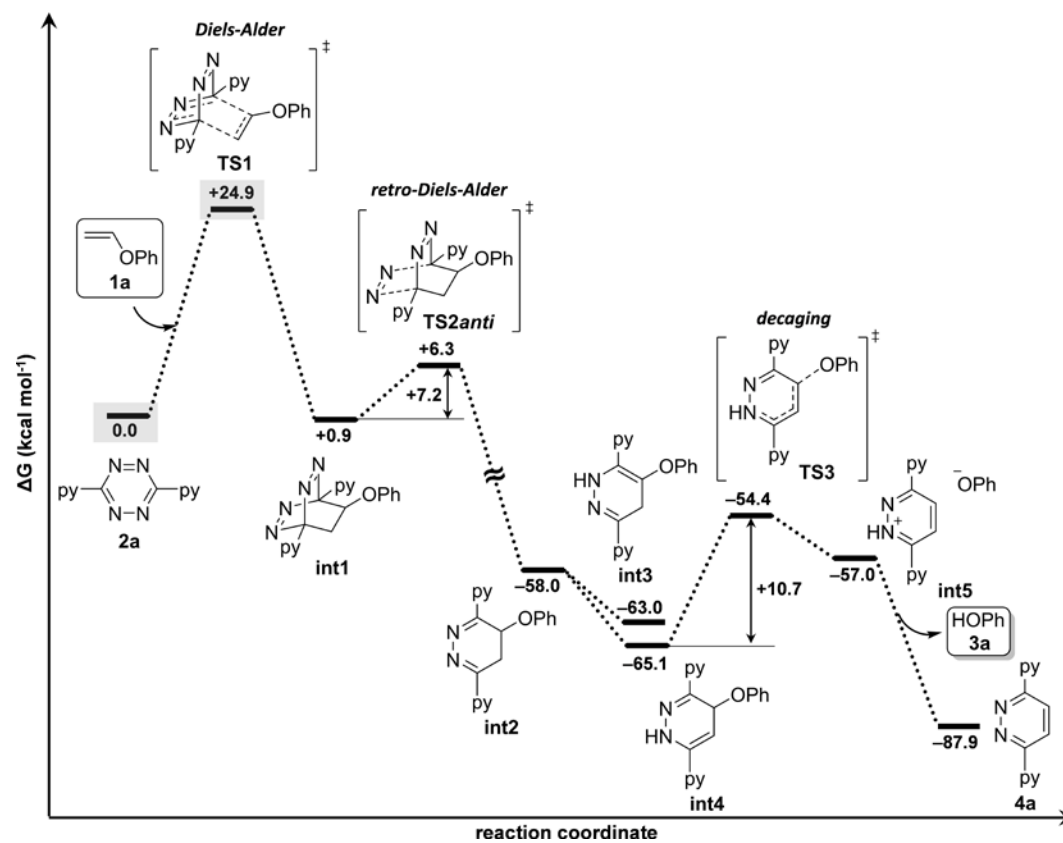

**Figure S5:** Guide to compound numbering of calculated structures (only the lowest energy conformers are shown)

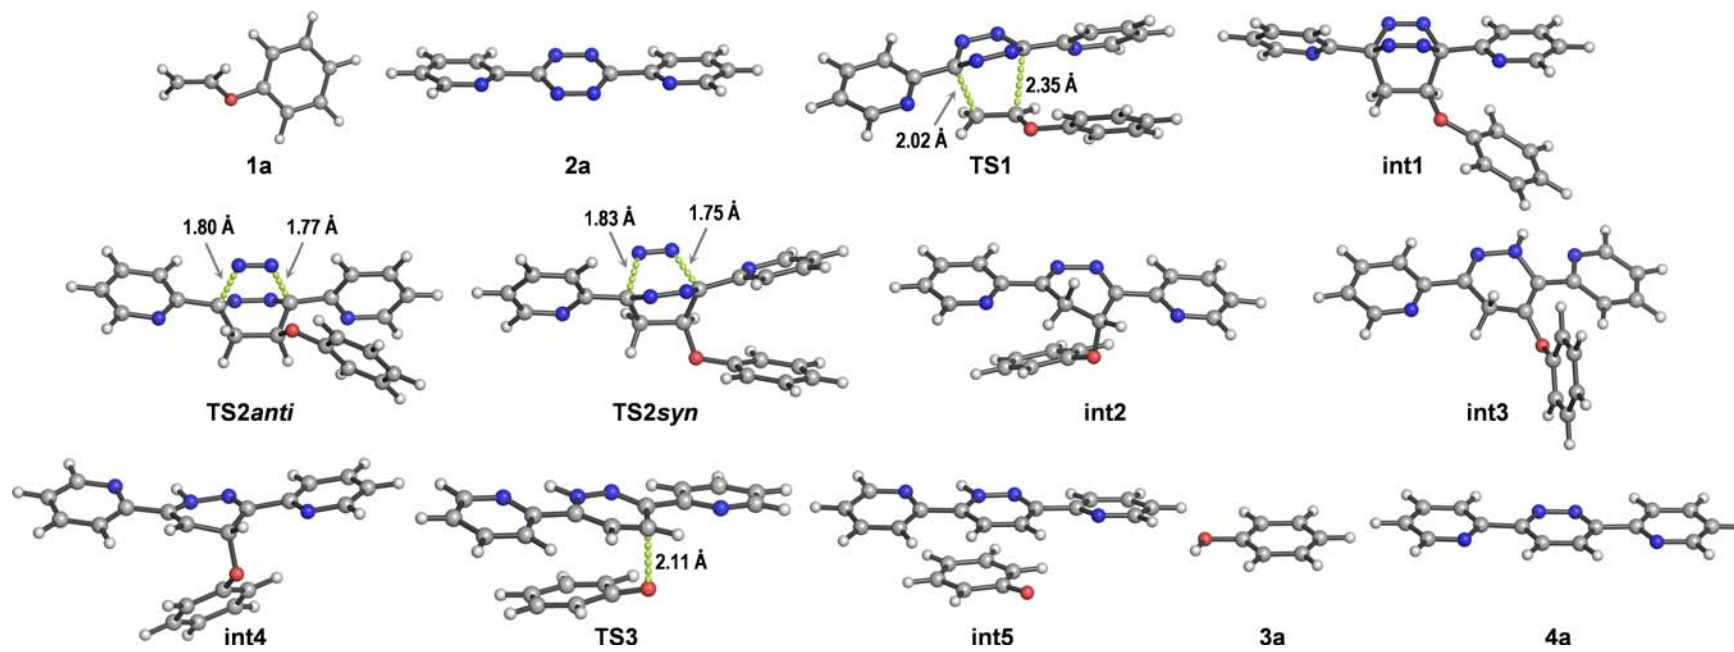

**Table S2.** Energies, entropies, and lowest frequencies of all the calculated structures.<sup>a</sup>

| Structure | E <sub>elec</sub><br>(Hartree) | E <sub>elec</sub> + ZPE<br>(Hartree) | H<br>(Hartree) | S<br>(cal mol <sup>-1</sup> K <sup>-1</sup> ) | G<br>(Hartree) | Lowest<br>freq. (cm <sup>-1</sup> ) | # of imag<br>freq. |
|-----------|--------------------------------|--------------------------------------|----------------|-----------------------------------------------|----------------|-------------------------------------|--------------------|
| 1a_a      | -384.711414                    | -384.572855                          | -384.564217    | 87.2                                          |                | 63.1                                | 0                  |
| 1a_b      | -384.710651                    | -384.572122                          | -384.563476    | 87.9                                          |                | 35.8                                | 0                  |
| N2        | -109.492420                    | -109.486625                          | -109.483321    | 45.8                                          |                | 2543.5                              | 0                  |
| 2a_a      | -790.249311                    | -790.057937                          | -790.043873    | 119.9                                         |                | 18.6                                | 0                  |
| 2a_b      | -790.249460                    | -790.057978                          | -790.043955    | 119.1                                         |                | 25.1                                | 0                  |
| TS1_a     | -1174.951657                   | -1174.619213                         | -1174.597818   | 150.6                                         |                | -426.4                              | 1                  |
| TS1_b     | -1174.951398                   | -1174.619003                         | -1174.597614   | 150.2                                         |                | -427.1                              | 1                  |
| TS1_c     | -1174.947912                   | -1174.615650                         | -1174.594175   | 151.8                                         |                | -445.9                              | 1                  |
| TS1_d     | -1174.947981                   | -1174.615597                         | -1174.594182   | 150.8                                         |                | -443.3                              | 1                  |
| int1_a    | -1174.994082                   | -1174.658059                         | -1174.637098   | 149.9                                         |                | 25.7                                | 0                  |
| int1_b    | -1174.995935                   | -1174.660008                         | -1174.638943   | 153.7                                         |                | 8.2                                 | 0                  |
| int1_c    | -1174.996010                   | -1174.660097                         | -1174.639104   | 151.1                                         |                | 17.8                                | 0                  |
| int1_d    | -1174.993982                   | -1174.658005                         | -1174.637009   | 151.3                                         |                | 16.1                                | 0                  |
| TS2anti_a | -1174.982516                   | -1174.649189                         | -1174.628047   | 150.6                                         |                | -580.2                              | 1                  |
| TS2anti_b | -1174.979988                   | -1174.646420                         | -1174.625363   | 148.6                                         |                | -584.7                              | 1                  |
| TS2anti_c | -1174.977782                   | -1174.644482                         | -1174.623147   | 152.7                                         |                | -577.3                              | 1                  |
| TS2anti_d | -1174.975103                   | -1174.641727                         | -1174.620425   | 151.7                                         |                | -582.1                              | 1                  |
| TS2syn_a  | -1174.980439                   | -1174.647052                         | -1174.625734   | 152.6                                         |                | -568.1                              | 1                  |
| TS2syn_b  | -1174.980207                   | -1174.646840                         | -1174.625578   | 151.3                                         |                | -568.8                              | 1                  |
| int2_a    | -1065.569642                   | -1065.244633                         | -1065.224397   | 149.2                                         |                | 22.9                                | 0                  |
| int2_b    | -1065.569318                   | -1065.244019                         | -1065.223675   | 151.7                                         |                | 12.5                                | 0                  |
| int2_c    | -1065.565378                   | -1065.240239                         | -1065.220088   | 147.6                                         |                | 22.2                                | 0                  |
| int2_d    | -1065.564751                   | -1065.239515                         | -1065.219186   | 151.1                                         |                | 12.3                                | 0                  |

|        |              |              |              |       |  |      |   |
|--------|--------------|--------------|--------------|-------|--|------|---|
| int2_e | -1065.564159 | -1065.239249 | -1065.218814 | 153.7 |  | 8.8  | 0 |
| int2_f | -1065.564094 | -1065.238746 | -1065.218402 | 151.2 |  | 15.5 | 0 |
| int2_g | -1065.564009 | -1065.238836 | -1065.218621 | 148.5 |  | 27.9 | 0 |
| int2_h | -1065.562183 | -1065.236986 | -1065.216717 | 149.6 |  | 21.0 | 0 |
| int2_i | -1065.561234 | -1065.235944 | -1065.215740 | 148.8 |  | 20.5 | 0 |
| int2_j | -1065.560526 | -1065.235529 | -1065.215158 | 151.3 |  | 21.1 | 0 |
| int2_k | -1065.559069 | -1065.234144 | -1065.213772 | 150.2 |  | 20.2 | 0 |
| int2_l | -1065.559357 | -1065.233980 | -1065.213679 | 150.0 |  | 15.2 | 0 |
| int2_m | -1065.559592 | -1065.234337 | -1065.214216 | 146.6 |  | 24.9 | 0 |
| int2_n | -1065.557079 | -1065.231697 | -1065.211482 | 148.6 |  | 20.9 | 0 |
| int2_o | -1065.556087 | -1065.230720 | -1065.210529 | 148.1 |  | 24.6 | 0 |
| int2_p | -1065.555220 | -1065.230252 | -1065.209868 | 150.9 |  | 22.2 | 0 |
| int3_a | -1065.578106 | -1065.252200 | -1065.231829 | 150.3 |  | 22.9 | 0 |
| int3_b | -1065.577174 | -1065.251453 | -1065.231032 | 152.4 |  | 14.1 | 0 |
| int3_c | -1065.573848 | -1065.247832 | -1065.227510 | 149.7 |  | 23.3 | 0 |
| int3_d | -1065.571460 | -1065.245989 | -1065.225491 | 151.3 |  | 15.7 | 0 |
| int3_e | -1065.570209 | -1065.244852 | -1065.224265 | 152.9 |  | 13.8 | 0 |
| int3_f | -1065.567203 | -1065.241513 | -1065.221109 | 150.0 |  | 18.9 | 0 |
| int3_g | -1065.567203 | -1065.241513 | -1065.221109 | 150.0 |  | 18.9 | 0 |
| int3_h | -1065.565966 | -1065.240374 | -1065.219868 | 151.8 |  | 14.4 | 0 |
| int4_a | -1065.581927 | -1065.255780 | -1065.235570 | 149.1 |  | 23.9 | 0 |
| int4_b | -1065.581527 | -1065.255178 | -1065.234883 | 150.7 |  | 13.6 | 0 |
| int4_c | -1065.579109 | -1065.252838 | -1065.232719 | 147.3 |  | 25.4 | 0 |
| int4_d | -1065.578099 | -1065.251696 | -1065.231435 | 150.2 |  | 14.0 | 0 |
| int4_e | -1065.577218 | -1065.251252 | -1065.230955 | 150.6 |  | 16.0 | 0 |
| int4_f | -1065.576430 | -1065.250189 | -1065.229830 | 150.8 |  | 14.2 | 0 |
| int4_g | -1065.574399 | -1065.248276 | -1065.228093 | 147.8 |  | 24.3 | 0 |

|               |              |              |              |       |  |        |   |
|---------------|--------------|--------------|--------------|-------|--|--------|---|
| <b>int4_h</b> | -1065.573062 | -1065.246781 | -1065.226465 | 150.0 |  | 14.1   | 0 |
| <b>TS3_a</b>  | -1065.562872 | -1065.238869 | -1065.218779 | 146.8 |  | -252.8 | 1 |
| <b>TS3_b</b>  | -1065.560238 | -1065.236022 | -1065.216025 | 145.5 |  | -249.5 | 1 |
| <b>TS3_c</b>  | -1065.557922 | -1065.233882 | -1065.213824 | 145.7 |  | -246.7 | 1 |
| <b>TS3_d</b>  | -1065.555286 | -1065.231203 | -1065.211154 | 145.7 |  | -236.6 | 1 |
| <b>int5_a</b> | -1065.566010 | -1065.241947 | -1065.221088 | 149.4 |  | 33.8   | 0 |
| <b>int5_b</b> | -1065.562909 | -1065.238887 | -1065.218018 | 149.7 |  | 33.2   | 0 |
| <b>int5_c</b> | -1065.560363 | -1065.236616 | -1065.215616 | 150.6 |  | 31.2   | 0 |
| <b>int5_d</b> | -1065.557156 | -1065.233063 | -1065.212216 | 149.0 |  | 32.7   | 0 |
| <b>3a</b>     | -307.361012  | -307.255693  | -307.249223  | 74.6  |  | 228.4  | 0 |
| <b>4a_a</b>   | -758.226686  | -758.010469  | -757.996258  | 121.7 |  | 7.5    | 0 |
| <b>4a_b</b>   | -758.222161  | -758.005761  | -757.991651  | 118.4 |  | 22.8   | 0 |
| <b>4a_c</b>   | -758.217480  | -758.001062  | -757.987003  | 117.0 |  | 37.3   | 0 |

<sup>a</sup>Energy values calculated at the PCM(H<sub>2</sub>O)/M06-2X/6-31+G(d,p) level. 1 Hartree = 627.51 kcal mol<sup>-1</sup>. Thermal corrections at 298.15 K.

**Cartesian coordinates of all structures calculated with PCM(H<sub>2</sub>O)/M06-2X/6-31+G(d,p)**

|                       |           |           |           |                        |           |           |           |
|-----------------------|-----------|-----------|-----------|------------------------|-----------|-----------|-----------|
| Structure <b>N2</b>   |           |           |           | C                      | -2.771898 | -0.007278 | 0.005028  |
| N                     | 0.000000  | 0.000000  | 0.549080  | C                      | -3.458010 | 1.207136  | 0.079713  |
| N                     | 0.000000  | 0.000000  | -0.549080 | N                      | -3.382376 | -1.193859 | -0.098201 |
| Structure <b>1a_a</b> |           |           |           | C                      | -4.849288 | 1.180772  | 0.049379  |
| C                     | -2.669131 | 0.366987  | -0.021213 | H                      | -2.911816 | 2.138620  | 0.163690  |
| C                     | -2.265203 | -0.969945 | -0.060510 | C                      | -4.714832 | -1.202165 | -0.129909 |
| C                     | -0.913900 | -1.299908 | -0.023756 | C                      | -5.494537 | -0.046164 | -0.057768 |
| C                     | 0.037343  | -0.282145 | 0.057962  | H                      | -5.415949 | 2.103772  | 0.110324  |
| C                     | -0.348902 | 1.056747  | 0.113380  | H                      | -5.185623 | -2.177384 | -0.219352 |
| C                     | -1.708286 | 1.372127  | 0.066193  | H                      | -6.575937 | -0.116168 | -0.086258 |
| H                     | -3.723402 | 0.620313  | -0.054122 | Structure <b>2a_b</b>  |           |           |           |
| H                     | -3.005456 | -1.761020 | -0.125916 | N                      | -0.643557 | -1.191805 | -0.057297 |
| H                     | -0.580464 | -2.331820 | -0.060082 | C                      | -1.284873 | -0.014518 | -0.031342 |
| H                     | 0.393666  | 1.841744  | 0.209872  | C                      | 1.284886  | 0.014452  | -0.031359 |
| H                     | -2.011111 | 2.413566  | 0.108642  | N                      | 0.661045  | -1.172382 | -0.048178 |
| O                     | 1.353152  | -0.676056 | 0.124857  | N                      | -0.661018 | 1.172319  | -0.048573 |
| C                     | 2.311368  | 0.183979  | -0.347334 | N                      | 0.643571  | 1.191743  | -0.057702 |
| H                     | 1.986143  | 0.834465  | -1.156400 | C                      | -2.771677 | -0.006789 | -0.002958 |
| C                     | 3.553033  | 0.155768  | 0.124939  | C                      | -3.468577 | 1.160160  | -0.324894 |
| H                     | 3.831477  | -0.506747 | 0.937183  | N                      | -3.371297 | -1.153073 | 0.340377  |
| H                     | 4.306000  | 0.796286  | -0.316004 | C                      | -4.859667 | 1.127271  | -0.290466 |
| Structure <b>1a_b</b> |           |           |           | H                      | -2.930332 | 2.059538  | -0.597910 |
| C                     | -2.456739 | -0.000718 | 0.370485  | C                      | -4.703699 | -1.167341 | 0.372594  |
| C                     | -1.794488 | -1.208809 | 0.147251  | C                      | -5.493780 | -0.057927 | 0.065233  |
| C                     | -0.471807 | -1.213639 | -0.295084 | H                      | -5.434713 | 2.012807  | -0.539225 |
| C                     | 0.171783  | 0.000710  | -0.510473 | H                      | -5.165758 | -2.108079 | 0.659304  |
| C                     | -0.472568 | 1.214342  | -0.293453 | H                      | -6.574534 | -0.130980 | 0.107061  |
| C                     | -1.795265 | 1.208084  | 0.148876  | C                      | 2.771679  | 0.006770  | -0.002950 |
| H                     | -3.486252 | -0.001329 | 0.713119  | C                      | 3.468628  | -1.159939 | -0.325644 |
| H                     | -2.307364 | -2.150417 | 0.314887  | N                      | 3.371226  | 1.152863  | 0.341142  |
| H                     | 0.063515  | -2.140663 | -0.474613 | C                      | 4.859715  | -1.127005 | -0.291192 |
| H                     | 0.062054  | 2.142016  | -0.471685 | H                      | 2.930410  | -2.059154 | -0.599257 |
| H                     | -2.308651 | 2.149191  | 0.317751  | C                      | 4.703631  | 1.167167  | 0.373389  |
| O                     | 1.471446  | 0.001513  | -0.994804 | C                      | 5.493762  | 0.057993  | 0.065300  |
| C                     | 2.482217  | 0.000040  | -0.070367 | H                      | 5.434811  | -2.012342 | -0.540542 |
| H                     | 3.442142  | 0.000331  | -0.575233 | H                      | 5.165646  | 2.107731  | 0.660739  |
| C                     | 2.355951  | -0.001278 | 1.255960  | H                      | 6.574512  | 0.131070  | 0.107187  |
| H                     | 1.393989  | -0.001446 | 1.755423  | Structure <b>TS1_a</b> |           |           |           |
| H                     | 3.254492  | -0.002174 | 1.859616  | C                      | 1.434059  | -0.371361 | 1.447581  |
| Structure <b>2a_a</b> |           |           |           | C                      | 0.056706  | -0.434724 | 1.322398  |
| N                     | 0.652897  | -1.177485 | 0.289514  | H                      | 1.843553  | 0.354492  | 2.140322  |
| C                     | 1.284941  | -0.021880 | 0.037238  | H                      | -0.632099 | 0.241135  | 1.822475  |
| C                     | -1.284941 | -0.021878 | 0.037248  | N                      | 0.234204  | 0.208901  | -1.332032 |
| N                     | -0.652896 | -1.177485 | 0.289516  | C                      | -0.210626 | 1.119652  | -0.418100 |
| N                     | 0.651781  | 1.141148  | -0.172820 | C                      | 2.186864  | 0.469046  | -0.231771 |
| N                     | -0.651779 | 1.141149  | -0.172816 | N                      | 1.468129  | -0.124102 | -1.263325 |
| C                     | 2.771898  | -0.007279 | 0.005025  | N                      | 0.654870  | 2.105946  | -0.016639 |
| C                     | 3.458010  | 1.207131  | 0.079771  | N                      | 1.892967  | 1.800459  | 0.022592  |
| N                     | 3.382375  | -1.193855 | -0.098260 | O                      | -0.433311 | -1.559026 | 0.768598  |
| C                     | 4.849288  | 1.180768  | 0.049438  | C                      | -1.789498 | -1.679645 | 0.495540  |
| H                     | 2.911815  | 2.138611  | 0.163793  | C                      | -2.771574 | -1.226916 | 1.371894  |
| C                     | 4.714831  | -1.202160 | -0.129967 | C                      | -2.109576 | -2.325094 | -0.694064 |
| C                     | 5.494537  | -0.046163 | -0.057768 | C                      | -4.109144 | -1.402952 | 1.019788  |
| H                     | 5.415949  | 2.103765  | 0.110429  | H                      | -2.510097 | -0.750277 | 2.311048  |
| H                     | 5.185623  | -2.177375 | -0.219458 | C                      | -3.450496 | -2.502155 | -1.026024 |
| H                     | 6.575936  | -0.116166 | -0.086261 | H                      | -1.309133 | -2.660047 | -1.345226 |
|                       |           |           |           | C                      | -4.452787 | -2.035429 | -0.174993 |

|                        |           |           |           |                        |           |           |           |
|------------------------|-----------|-----------|-----------|------------------------|-----------|-----------|-----------|
| H                      | -4.884024 | -1.044164 | 1.689621  | H                      | 3.639445  | -1.258275 | -1.875948 |
| H                      | -3.710254 | -2.997657 | -1.955887 | C                      | 5.581083  | 0.328841  | 0.990743  |
| H                      | -5.496898 | -2.165935 | -0.439372 | C                      | 6.268357  | -0.544906 | 0.148246  |
| H                      | 1.983744  | -1.298017 | 1.312006  | H                      | 6.065814  | -1.821398 | -1.579591 |
| C                      | -1.663339 | 1.419207  | -0.343778 | H                      | 6.089980  | 0.803315  | 1.825512  |
| C                      | -2.538364 | 1.026316  | -1.358964 | H                      | 7.318217  | -0.754159 | 0.319019  |
| N                      | -2.058105 | 2.061485  | 0.761870  |                        |           |           |           |
| C                      | -3.888874 | 1.321763  | -1.212602 | Structure <b>TS1_c</b> |           |           |           |
| H                      | -2.160434 | 0.497837  | -2.226385 | C                      | 1.433756  | -0.520230 | 1.296092  |
| C                      | -3.357913 | 2.342796  | 0.885329  | C                      | 0.051463  | -0.507552 | 1.194043  |
| C                      | -4.311555 | 1.996474  | -0.069869 | H                      | 1.896537  | 0.119064  | 2.038070  |
| H                      | -4.599922 | 1.027047  | -1.977643 | H                      | -0.580887 | 0.176092  | 1.750944  |
| H                      | -3.651239 | 2.861394  | 1.794297  | N                      | 0.313715  | 0.293516  | -1.447664 |
| H                      | -5.355636 | 2.242309  | 0.088060  | C                      | -0.151844 | 1.154074  | -0.493375 |
| C                      | 3.631326  | 0.082259  | -0.140743 | C                      | 2.232077  | 0.447546  | -0.263389 |
| C                      | 4.619728  | 1.044305  | 0.066753  | N                      | 1.541662  | -0.052036 | -1.356765 |
| N                      | 3.890834  | -1.223209 | -0.267772 | N                      | 0.715509  | 2.088018  | 0.009630  |
| C                      | 5.945348  | 0.621425  | 0.132841  | N                      | 1.948469  | 1.766594  | 0.080396  |
| H                      | 4.351157  | 2.088826  | 0.164096  | O                      | -0.519889 | -1.568539 | 0.603212  |
| C                      | 5.165109  | -1.613528 | -0.206962 | C                      | -1.899885 | -1.678166 | 0.485879  |
| C                      | 6.228827  | -0.732488 | -0.009473 | C                      | -2.786575 | -1.150504 | 1.419499  |
| H                      | 6.741543  | 1.341527  | 0.290244  | C                      | -2.344697 | -2.403534 | -0.614497 |
| H                      | 5.345271  | -2.679878 | -0.313422 | C                      | -4.154846 | -1.332361 | 1.214723  |
| H                      | 7.245333  | -1.106433 | 0.035435  | H                      | -2.438366 | -0.616634 | 2.296813  |
|                        |           |           |           | C                      | -3.712323 | -2.585082 | -0.797946 |
| Structure <b>TS1_b</b> |           |           |           | H                      | -1.617284 | -2.798584 | -1.315714 |
| C                      | 1.445781  | -0.303470 | 1.431815  | C                      | -4.622475 | -2.044821 | 0.111697  |
| C                      | 0.066505  | -0.363234 | 1.323503  | H                      | -4.854562 | -0.915279 | 1.931898  |
| H                      | 1.882844  | 0.461323  | 2.062064  | H                      | -4.066027 | -3.144055 | -1.658220 |
| H                      | -0.611425 | 0.353571  | 1.779654  | H                      | -5.688610 | -2.179862 | -0.036748 |
| N                      | 0.227541  | 0.114274  | -1.369476 | H                      | 1.923785  | -1.468675 | -1.096391 |
| C                      | -0.211090 | 1.076284  | -0.507382 | C                      | -1.601768 | 1.476406  | -0.431086 |
| C                      | 2.187379  | 0.436586  | -0.298244 | C                      | -2.068876 | 2.325025  | 0.577025  |
| N                      | 1.464118  | -0.208743 | -1.286608 | N                      | -2.405206 | 0.894446  | -1.328808 |
| N                      | 0.657840  | 2.084500  | -0.170234 | C                      | -3.435918 | 2.570303  | 0.657197  |
| N                      | 1.896060  | 1.786374  | -0.116127 | H                      | -1.372454 | 2.771694  | 1.278587  |
| O                      | -0.437626 | -1.521757 | 0.859519  | C                      | -3.713047 | 1.135966  | -1.236651 |
| C                      | -1.797299 | -1.651673 | 0.609397  | C                      | -4.280715 | 1.965093  | -0.264384 |
| C                      | -2.766528 | -1.131575 | 1.462292  | H                      | -3.832218 | 3.219973  | 1.430667  |
| C                      | -2.134711 | -2.377498 | -0.527941 | H                      | -4.342553 | 0.644154  | -1.974126 |
| C                      | -4.109007 | -1.322975 | 1.138300  | H                      | -5.354075 | 2.110936  | -0.235487 |
| H                      | -2.491099 | -0.590837 | 2.361929  | C                      | 3.670498  | 0.045109  | -0.144835 |
| C                      | -3.480443 | -2.568636 | -0.831667 | C                      | 4.288367  | -0.716327 | -1.137038 |
| H                      | -1.343907 | -2.763580 | -1.162390 | N                      | 4.292996  | 0.451807  | 0.966241  |
| C                      | -4.470083 | -2.036327 | -0.004665 | C                      | 5.627065  | -1.059017 | -0.964038 |
| H                      | -4.874026 | -0.912579 | 1.789573  | H                      | 3.732374  | -1.019642 | -2.015433 |
| H                      | -3.753756 | -3.126967 | -1.721166 | C                      | 5.576406  | 0.118458  | 1.117028  |
| H                      | -5.517904 | -2.178448 | -0.247489 | C                      | 6.288932  | -0.633527 | 0.182963  |
| H                      | 1.979557  | -1.246795 | 1.365472  | H                      | 6.142597  | -1.646916 | -1.716299 |
| C                      | -1.663027 | 1.381625  | -0.440462 | H                      | 6.056908  | 0.462699  | 2.028900  |
| C                      | -2.547178 | 0.926412  | -1.420975 | H                      | 7.330387  | -0.877223 | 0.359427  |
| N                      | -2.047468 | 2.093389  | 0.625576  |                        |           |           |           |
| C                      | -3.896042 | 1.232985  | -1.282072 | Structure <b>TS1_d</b> |           |           |           |
| H                      | -2.177431 | 0.343158  | -2.256272 | C                      | 1.429732  | -0.498583 | 1.350262  |
| C                      | -3.345745 | 2.384412  | 0.742094  | C                      | 0.048834  | -0.512367 | 1.235613  |
| C                      | -4.307939 | 1.979952  | -0.181158 | H                      | 1.857771  | 0.147886  | 2.107561  |
| H                      | -4.614100 | 0.891450  | -2.020635 | H                      | -0.604163 | 0.148400  | 1.796382  |
| H                      | -3.630605 | 2.959663  | 1.619071  | N                      | 0.297635  | 0.300468  | -1.395350 |
| H                      | -5.350345 | 2.237087  | -0.030310 | C                      | -0.166901 | 1.163517  | -0.442328 |
| C                      | 3.632341  | 0.063824  | -0.176235 | C                      | 2.219743  | 0.462916  | -0.217528 |
| C                      | 4.223032  | -0.828703 | -1.071176 | N                      | 1.524497  | -0.047924 | -1.310835 |
| N                      | 4.289433  | 0.629523  | 0.841556  | N                      | 0.699624  | 2.100180  | 0.055812  |
| C                      | 5.570796  | -1.134873 | -0.900655 | N                      | 1.933561  | 1.777207  | 0.118051  |



|   |           |           |           |
|---|-----------|-----------|-----------|
| O | -0.493653 | -1.573509 | 0.619041  |
| C | -1.868518 | -1.687077 | 0.452380  |
| C | -2.787286 | -1.193517 | 1.373737  |
| C | -2.273503 | -2.378523 | -0.684183 |
| C | -4.147117 | -1.374428 | 1.119581  |
| H | -2.469167 | -0.686468 | 2.278109  |
| C | -3.633778 | -2.560258 | -0.917050 |
| H | -1.521715 | -2.747104 | -1.374003 |
| C | -4.575137 | -2.053339 | -0.020349 |
| H | -4.871882 | -0.983976 | 1.826793  |
| H | -3.956911 | -3.092766 | -1.805685 |
| H | -5.635257 | -2.187974 | -0.207369 |
| H | 1.948454  | -1.429418 | 1.140642  |
| C | -1.616572 | 1.487018  | -0.377815 |
| C | -2.085589 | 2.302706  | 0.656271  |
| N | -2.416888 | 0.943326  | -1.301964 |
| C | -3.451548 | 2.553982  | 0.736080  |
| H | -1.391301 | 2.719711  | 1.378060  |
| C | -3.723699 | 1.190724  | -1.210312 |
| C | -4.293330 | 1.983286  | -0.212758 |
| H | -3.849227 | 3.178129  | 1.529615  |
| H | -4.351008 | 0.731215  | -1.970133 |
| H | -5.365861 | 2.139842  | -0.186403 |
| C | 3.660191  | 0.058134  | -0.120902 |
| C | 4.650536  | 0.994505  | 0.175248  |
| N | 3.913049  | -1.237595 | -0.331789 |
| C | 5.971111  | 0.555895  | 0.242123  |
| H | 4.387653  | 2.032097  | 0.339022  |
| C | 5.182530  | -1.642926 | -0.269909 |
| C | 6.247877  | -0.787281 | 0.012225  |
| H | 6.768747  | 1.256019  | 0.467605  |
| H | 5.357017  | -2.700911 | -0.446289 |
| H | 7.260284  | -1.172528 | 0.053971  |

Structure **int1\_a**

|   |           |           |           |
|---|-----------|-----------|-----------|
| C | -1.382969 | -0.977254 | -0.515804 |
| C | 0.068905  | -0.513992 | -0.539284 |
| H | -1.754337 | -1.244917 | -1.504392 |
| H | 0.445991  | -0.445556 | -1.561546 |
| N | -0.553628 | 0.851800  | 1.399694  |
| C | 0.088806  | 0.943653  | 0.072520  |
| C | -2.250315 | 0.186779  | 0.024510  |
| N | -1.732579 | 0.484816  | 1.370077  |
| N | -0.787210 | 1.732855  | -0.814231 |
| N | -1.963305 | 1.359435  | -0.843575 |
| O | 0.840604  | -1.392414 | 0.241057  |
| C | 2.169729  | -1.616553 | -0.031960 |
| C | 2.876380  | -1.077307 | -1.106751 |
| C | 2.806345  | -2.471718 | 0.872005  |
| C | 4.227338  | -1.399529 | -1.261498 |
| H | 2.418252  | -0.396716 | -1.813615 |
| C | 4.150790  | -2.782288 | 0.704336  |
| H | 2.231898  | -2.875461 | 1.699370  |
| C | 4.872902  | -2.246363 | -0.365060 |
| H | 4.773417  | -0.969656 | -2.095555 |
| H | 4.636163  | -3.444965 | 1.413959  |
| H | 5.923123  | -2.484818 | -0.494116 |
| H | -1.489826 | -1.830655 | 0.156783  |
| C | 1.474435  | 1.535517  | 0.161362  |
| C | 1.979727  | 2.319284  | -0.876855 |
| N | 2.188434  | 1.187668  | 1.234806  |
| C | 3.302228  | 2.746426  | -0.795815 |
| H | 1.355298  | 2.576306  | -1.724425 |

|   |           |           |           |
|---|-----------|-----------|-----------|
| C | 3.455126  | 1.604958  | 1.299787  |
| C | 4.061030  | 2.378671  | 0.310910  |
| H | 3.731284  | 3.352586  | -1.586920 |
| H | 4.013612  | 1.302622  | 2.182013  |
| H | 5.096722  | 2.682457  | 0.413357  |
| C | -3.729411 | -0.112484 | 0.028307  |
| C | -4.503845 | -0.023824 | 1.183125  |
| N | -4.224146 | -0.458287 | -1.164911 |
| C | -5.864265 | -0.311208 | 1.085343  |
| H | -4.052164 | 0.259253  | 2.125592  |
| C | -5.528823 | -0.727879 | -1.245003 |
| C | -6.391178 | -0.669869 | -0.150221 |
| H | -6.499340 | -0.253383 | 1.963230  |
| H | -5.902264 | -1.004551 | -2.227283 |
| H | -7.443224 | -0.901362 | -0.271655 |

Structure **int1\_b**

|   |           |           |           |
|---|-----------|-----------|-----------|
| C | -1.425953 | -0.843924 | -0.798268 |
| C | 0.042294  | -0.448866 | -0.731540 |
| H | -1.819507 | -0.843434 | -1.814039 |
| H | 0.463064  | -0.240068 | -1.716858 |
| N | -0.468973 | 0.561802  | 1.414793  |
| C | 0.115315  | 0.886174  | 0.104995  |
| C | -2.238685 | 0.191352  | 0.023398  |
| N | -1.654475 | 0.212822  | 1.373447  |
| N | -0.780470 | 1.849901  | -0.577778 |
| N | -1.964953 | 1.509029  | -0.611264 |
| O | 0.735943  | -1.478977 | -0.060066 |
| C | 2.102390  | -1.620272 | -0.169067 |
| C | 2.871791  | -1.122227 | -1.219906 |
| C | 2.696697  | -2.361563 | 0.854789  |
| C | 4.247728  | -1.360524 | -1.224074 |
| H | 2.433454  | -0.538793 | -2.020494 |
| C | 4.067539  | -2.596172 | 0.833122  |
| H | 2.071180  | -2.735730 | 1.658793  |
| C | 4.853727  | -2.092302 | -0.205455 |
| H | 4.845145  | -0.961636 | -2.038191 |
| H | 4.522766  | -3.169380 | 1.634646  |
| H | 5.924071  | -2.267925 | -0.219030 |
| H | -1.565093 | -1.831337 | -0.354558 |
| C | 1.515339  | 1.436892  | 0.208774  |
| C | 2.262288  | 1.336535  | 1.380471  |
| N | 1.991896  | 1.949593  | -0.929222 |
| C | 3.580147  | 1.788198  | 1.358310  |
| H | 1.826140  | 0.903326  | 2.272463  |
| C | 3.252440  | 2.387388  | -0.934231 |
| C | 4.089011  | 2.324402  | 0.179960  |
| H | 4.197750  | 1.717871  | 2.247778  |
| H | 3.614337  | 2.798636  | -1.872896 |
| H | 5.109676  | 2.684431  | 0.116530  |
| C | -3.722240 | -0.084452 | 0.041099  |
| C | -4.442864 | -0.206625 | 1.227407  |
| N | -4.276970 | -0.191762 | -1.170934 |
| C | -5.811916 | -0.453925 | 1.142007  |
| H | -3.944466 | -0.112598 | 2.184027  |
| C | -5.589246 | -0.425835 | -1.238237 |
| C | -6.400693 | -0.566064 | -0.112512 |
| H | -6.405976 | -0.555520 | 2.044312  |
| H | -6.011509 | -0.506814 | -2.236246 |
| H | -7.461627 | -0.758056 | -0.225229 |

Structure **int1\_c**

|   |          |          |           |
|---|----------|----------|-----------|
| C | 1.442832 | 0.675387 | -1.018402 |
|---|----------|----------|-----------|

|   |           |           |           |
|---|-----------|-----------|-----------|
| C | -0.036628 | 0.348789  | -0.879181 |
| H | 1.812577  | 0.504676  | -2.030152 |
| H | -0.490664 | 0.041247  | -1.823407 |
| N | 0.448851  | -0.386658 | 1.374346  |
| C | -0.138336 | -0.873519 | 0.114164  |
| C | 2.231657  | -0.252703 | -0.057060 |
| N | 1.637627  | -0.065608 | 1.295006  |
| N | 0.739204  | -1.936075 | -0.426221 |
| N | 1.933244  | -1.626031 | -0.492363 |
| O | -0.668813 | 1.485153  | -0.326405 |
| C | -2.042186 | 1.610819  | -0.326994 |
| C | -2.879941 | 1.057190  | -1.294309 |
| C | -2.566368 | 2.392766  | 0.703512  |
| C | -4.255493 | 1.274692  | -1.203377 |
| H | -2.488192 | 0.446481  | -2.099337 |
| C | -3.939168 | 2.609717  | 0.775543  |
| H | -1.887327 | 2.810066  | 1.440079  |
| C | -4.793090 | 2.046054  | -0.174439 |
| H | -4.907431 | 0.831211  | -1.949731 |
| H | -4.342063 | 3.214521  | 1.581866  |
| H | -5.864196 | 2.206641  | -0.113186 |
| H | 1.631969  | 1.709968  | -0.731908 |
| C | -1.545049 | -1.391967 | 0.280452  |
| C | -2.275432 | -1.197870 | 1.450616  |
| N | -2.038318 | -1.990852 | -0.807242 |
| C | -3.596200 | -1.640213 | 1.479252  |
| H | -1.825797 | -0.700082 | 2.301167  |
| C | -3.301716 | -2.418170 | -0.763407 |
| C | -4.123974 | -2.261109 | 0.351872  |
| H | -4.201728 | -1.497215 | 2.368351  |
| H | -3.677423 | -2.899900 | -1.662274 |
| H | -5.147969 | -2.616524 | 0.328745  |
| C | 3.713137  | 0.031219  | -0.019614 |
| C | 4.665006  | -0.963591 | -0.234042 |
| N | 4.026435  | 1.302957  | 0.249774  |
| C | 6.011658  | -0.610831 | -0.165017 |
| H | 4.357662  | -1.979205 | -0.449614 |
| C | 5.319675  | 1.626504  | 0.316200  |
| C | 6.350091  | 0.708179  | 0.115557  |
| H | 6.781275  | -1.358429 | -0.326779 |
| H | 5.543215  | 2.666668  | 0.537656  |
| H | 7.384445  | 1.026470  | 0.178701  |

Structure **int1\_d**

|   |           |           |           |
|---|-----------|-----------|-----------|
| C | -1.380456 | -0.876734 | -0.709633 |
| C | 0.074928  | -0.428993 | -0.642697 |
| H | -1.718570 | -1.021103 | -1.736257 |
| H | 0.479934  | -0.253141 | -1.640993 |
| N | -0.573256 | 0.705238  | 1.427337  |
| C | 0.089944  | 0.951953  | 0.126385  |
| C | -2.252446 | 0.223993  | -0.055860 |
| N | -1.749651 | 0.348904  | 1.341084  |
| N | -0.768661 | 1.843332  | -0.670222 |
| N | -1.947977 | 1.480393  | -0.757055 |
| O | 0.819516  | -1.395047 | 0.056713  |
| C | 2.154183  | -1.600625 | -0.204443 |
| C | 2.891380  | -0.958285 | -1.199128 |
| C | 2.762541  | -2.550145 | 0.621402  |
| C | 4.244171  | -1.273447 | -1.352202 |
| H | 2.455632  | -0.204842 | -1.843415 |
| C | 4.109288  | -2.852190 | 0.456525  |
| H | 2.164732  | -3.032929 | 1.387595  |
| C | 4.861817  | -2.213670 | -0.532534 |

|   |           |           |           |
|---|-----------|-----------|-----------|
| H | 4.813967  | -0.763585 | -2.122954 |
| H | 4.572624  | -3.588584 | 1.105618  |
| H | 5.913840  | -2.445568 | -0.658866 |
| H | -1.521163 | -1.801289 | -0.148924 |
| C | 1.476446  | 1.522310  | 0.302520  |
| C | 2.004897  | 2.401697  | -0.643546 |
| N | 2.168889  | 1.064885  | 1.348624  |
| C | 3.327671  | 2.809820  | -0.497151 |
| H | 1.397204  | 2.744867  | -1.472670 |
| C | 3.436375  | 1.464941  | 1.477002  |
| C | 4.064250  | 2.328915  | 0.580849  |
| H | 3.774265  | 3.488129  | -1.216748 |
| H | 3.977065  | 1.072696  | 2.334520  |
| H | 5.099489  | 2.613674  | 0.731227  |
| C | -3.728166 | -0.089619 | -0.052539 |
| C | -4.679280 | 0.808603  | -0.532531 |
| N | -4.038589 | -1.284142 | 0.461976  |
| C | -6.021822 | 0.438709  | -0.473030 |
| H | -4.374616 | 1.764227  | -0.940337 |
| C | -5.328041 | -1.624471 | 0.515819  |
| C | -6.357252 | -0.800349 | 0.061002  |
| H | -6.790750 | 1.111862  | -0.837693 |
| H | -5.549297 | -2.600305 | 0.939774  |
| H | -7.388335 | -1.128499 | 0.126953  |

Structure **TS2anti\_a**

|   |           |           |           |
|---|-----------|-----------|-----------|
| C | -1.471712 | -0.554996 | -1.212916 |
| C | 0.029625  | -0.351301 | -1.072182 |
| H | -1.880255 | -0.117191 | -2.123759 |
| H | 0.505489  | -0.001841 | -1.991949 |
| N | -0.278667 | 0.311392  | 1.258978  |
| C | 0.294961  | 0.670146  | 0.062096  |
| C | -2.167575 | 0.044307  | 0.004743  |
| N | -1.522026 | -0.022690 | 1.224550  |
| N | -0.725547 | 2.006157  | -0.477874 |
| N | -1.861558 | 1.757155  | -0.461439 |
| O | 0.546392  | -1.622415 | -0.673889 |
| C | 1.888067  | -1.718476 | -0.357809 |
| C | 2.887904  | -1.297098 | -1.233974 |
| C | 2.206451  | -2.287163 | 0.872683  |
| C | 4.221053  | -1.415866 | -0.846998 |
| H | 2.628904  | -0.857751 | -2.192160 |
| C | 3.544578  | -2.416951 | 1.242251  |
| H | 1.401929  | -2.603029 | 1.529240  |
| C | 4.554520  | -1.972413 | 0.389475  |
| H | 5.002335  | -1.072375 | -1.518009 |
| H | 3.795088  | -2.854526 | 2.203525  |
| H | 5.595363  | -2.060364 | 0.683365  |
| H | -1.678534 | -1.627171 | -1.232133 |
| C | 1.676106  | 1.249211  | 0.138264  |
| C | 2.439153  | 1.179803  | 1.303145  |
| N | 2.112916  | 1.801012  | -0.998320 |
| C | 3.732751  | 1.691667  | 1.270284  |
| H | 2.030486  | 0.714637  | 2.192191  |
| C | 3.350689  | 2.300078  | -1.011800 |
| C | 4.202477  | 2.263582  | 0.091154  |
| H | 4.364716  | 1.639594  | 2.151027  |
| H | 3.679410  | 2.743676  | -1.947969 |
| H | 5.204482  | 2.671513  | 0.020347  |
| C | -3.651563 | -0.105424 | 0.087956  |
| C | -4.342912 | 0.330126  | 1.221096  |
| N | -4.256440 | -0.628470 | -0.983767 |
| C | -5.726870 | 0.197210  | 1.242520  |

|   |           |           |           |
|---|-----------|-----------|-----------|
| H | -3.799408 | 0.757638  | 2.055949  |
| C | -5.587012 | -0.749070 | -0.950796 |
| C | -6.365951 | -0.355599 | 0.135317  |
| H | -6.296875 | 0.522694  | 2.106499  |
| H | -6.050723 | -1.180717 | -1.833664 |
| H | -7.442726 | -0.477985 | 0.106659  |

Structure **TS2anti\_b**

|   |           |           |           |
|---|-----------|-----------|-----------|
| C | -1.453975 | -0.637207 | -1.209375 |
| C | 0.045997  | -0.405675 | -1.073286 |
| H | -1.856333 | -0.248442 | -2.147240 |
| H | 0.516196  | -0.076240 | -2.003214 |
| N | -0.291576 | 0.326870  | 1.230361  |
| C | 0.294391  | 0.644969  | 0.032364  |
| C | -2.169976 | 0.007351  | -0.027386 |
| N | -1.535957 | -0.012516 | 1.199916  |
| N | -0.746552 | 1.970094  | -0.571719 |
| N | -1.876376 | 1.704681  | -0.555368 |
| O | 0.577409  | -1.660916 | -0.642693 |
| C | 1.916543  | -1.728942 | -0.307319 |
| C | 2.920735  | -1.326942 | -1.187308 |
| C | 2.227231  | -2.248196 | 0.946675  |
| C | 4.250725  | -1.414274 | -0.781434 |
| H | 2.666503  | -0.925950 | -2.163482 |
| C | 3.562551  | -2.347900 | 1.335308  |
| H | 1.419076  | -2.549970 | 1.605398  |
| C | 4.576574  | -1.921825 | 0.477959  |
| H | 5.035495  | -1.085335 | -1.455637 |
| H | 3.807419  | -2.747161 | 2.314534  |
| H | 5.614976  | -1.986071 | 0.786251  |
| H | -1.622320 | -1.716443 | -1.178536 |
| C | 1.665256  | 1.246480  | 0.099752  |
| C | 2.415804  | 1.234085  | 1.274887  |
| N | 2.106941  | 1.761650  | -1.052275 |
| C | 3.701515  | 1.764954  | 1.236811  |
| H | 2.004025  | 0.796899  | 2.176641  |
| C | 3.336591  | 2.280097  | -1.070866 |
| C | 4.175914  | 2.299443  | 0.042048  |
| H | 4.323979  | 1.756304  | 2.125781  |
| H | 3.669310  | 2.693070  | -2.019573 |
| H | 5.172053  | 2.720738  | -0.033087 |
| C | -3.657063 | -0.120649 | 0.059728  |
| C | -4.371929 | -0.981198 | -0.773059 |
| N | -4.243666 | 0.665397  | 0.972120  |
| C | -5.758136 | -1.038318 | -0.638160 |
| H | -3.868284 | -1.601352 | -1.505397 |
| C | -5.569742 | 0.601282  | 1.091349  |
| C | -6.373191 | -0.234643 | 0.313477  |
| H | -6.341840 | -1.701524 | -1.267794 |
| H | -6.016020 | 1.251692  | 1.839041  |
| H | -7.448093 | -0.243471 | 0.453630  |

Structure **TS2anti\_c**

|   |           |           |           |
|---|-----------|-----------|-----------|
| C | -1.389494 | -0.965933 | -0.649130 |
| C | 0.069531  | -0.517441 | -0.614385 |
| H | -1.764233 | -1.091156 | -1.664502 |
| H | 0.480297  | -0.429254 | -1.622831 |
| N | -0.540990 | 0.941366  | 1.290249  |
| C | 0.155950  | 0.849150  | 0.109440  |
| C | -2.258293 | 0.029355  | 0.102858  |
| N | -1.766771 | 0.540488  | 1.279575  |
| N | -0.842146 | 1.769037  | -1.015076 |
| N | -1.955821 | 1.439764  | -1.026801 |

|   |           |           |           |
|---|-----------|-----------|-----------|
| O | 0.791552  | -1.468037 | 0.150538  |
| C | 2.146172  | -1.643406 | -0.012174 |
| C | 2.897306  | -1.159365 | -1.083255 |
| C | 2.757472  | -2.400732 | 0.991036  |
| C | 4.267018  | -1.430532 | -1.130686 |
| H | 2.454126  | -0.565716 | -1.873060 |
| C | 4.120582  | -2.666742 | 0.927060  |
| H | 2.148780  | -2.764445 | 1.812490  |
| C | 4.887335  | -2.179140 | -0.134084 |
| H | 4.847273  | -1.042956 | -1.962474 |
| H | 4.585839  | -3.253234 | 1.713113  |
| H | 5.952193  | -2.380160 | -0.181152 |
| H | -1.472970 | -1.928919 | -0.138625 |
| C | 1.522213  | 1.478082  | 0.134273  |
| C | 2.029459  | 2.140868  | -0.984697 |
| N | 2.228183  | 1.281177  | 1.252096  |
| C | 3.338897  | 2.610166  | -0.938319 |
| H | 1.419676  | 2.279431  | -1.870160 |
| C | 3.484798  | 1.731937  | 1.280342  |
| C | 4.088544  | 2.396761  | 0.213796  |
| H | 3.765315  | 3.127944  | -1.791153 |
| H | 4.036844  | 1.549687  | 2.198758  |
| H | 5.115443  | 2.735383  | 0.292379  |
| C | -3.734175 | -0.194418 | 0.091176  |
| C | -4.576473 | 0.627313  | 0.844327  |
| N | -4.181406 | -1.178387 | -0.696067 |
| C | -5.946914 | 0.400437  | 0.784423  |
| H | -4.156647 | 1.417602  | 1.456235  |
| C | -5.500795 | -1.385544 | -0.744640 |
| C | -6.422801 | -0.628523 | -0.024838 |
| H | -6.631709 | 1.017893  | 1.356331  |
| H | -5.835174 | -2.194045 | -1.389017 |
| H | -7.482799 | -0.841632 | -0.103604 |

Structure **TS2anti\_d**

|   |           |           |           |
|---|-----------|-----------|-----------|
| C | 1.375431  | 0.987547  | -0.675203 |
| C | -0.080520 | 0.524040  | -0.634506 |
| H | 1.736250  | 1.103060  | -1.699021 |
| H | -0.486211 | 0.406217  | -1.641965 |
| N | 0.549899  | -0.880788 | 1.300518  |
| C | -0.155798 | -0.818464 | 0.127883  |
| C | 2.258614  | 0.010966  | 0.085606  |
| N | 1.776794  | -0.476560 | 1.276085  |
| N | 0.862035  | -1.766817 | -0.996113 |
| N | 1.968282  | -1.420803 | -1.013976 |
| O | -0.809788 | 1.492450  | 0.101107  |
| C | -2.169157 | 1.640036  | -0.053902 |
| C | -2.916814 | 1.129181  | -1.114691 |
| C | -2.787782 | 2.398902  | 0.943310  |
| C | -4.291601 | 1.374049  | -1.157036 |
| H | -2.466429 | 0.534611  | -1.899824 |
| C | -4.155888 | 2.639510  | 0.883930  |
| H | -2.181061 | 2.783472  | 1.756669  |
| C | -4.919496 | 2.124219  | -0.166246 |
| H | -4.869621 | 0.965498  | -1.980264 |
| H | -4.627378 | 3.227416  | 1.665179  |
| H | -5.988155 | 2.304943  | -0.209349 |
| H | 1.431329  | 1.958292  | -0.174590 |
| C | -1.513094 | -1.463987 | 0.167487  |
| C | -2.015261 | -2.148993 | -0.940416 |
| N | -2.217135 | -1.263250 | 1.285993  |
| C | -3.316718 | -2.638414 | -0.881771 |
| H | -1.407268 | -2.289172 | -1.826870 |

|   |           |           |           |
|---|-----------|-----------|-----------|
| C | -3.466329 | -1.733461 | 1.325928  |
| C | -4.064228 | -2.422023 | 0.271194  |
| H | -3.738767 | -3.173999 | -1.725730 |
| H | -4.017198 | -1.547595 | 2.244326  |
| H | -5.085188 | -2.775916 | 0.359268  |
| C | 3.737678  | 0.220774  | 0.064840  |
| C | 4.305821  | 1.395912  | -0.426524 |
| N | 4.464763  | -0.800892 | 0.535232  |
| C | 5.694178  | 1.518801  | -0.413600 |
| H | 3.688014  | 2.203747  | -0.801653 |
| C | 5.791487  | -0.671534 | 0.540537  |
| C | 6.455809  | 0.466841  | 0.080003  |
| H | 6.166781  | 2.422647  | -0.783257 |
| H | 6.354353  | -1.517799 | 0.925526  |
| H | 7.538390  | 0.515339  | 0.107589  |

Structure **TS2syn\_a**

|   |           |           |           |
|---|-----------|-----------|-----------|
| C | -1.368598 | -0.917747 | -0.706872 |
| C | 0.084535  | -0.450958 | -0.646847 |
| H | -1.650934 | -1.197421 | -1.723700 |
| H | 0.512684  | -0.398168 | -1.650589 |
| N | -0.564425 | 0.646144  | 1.495024  |
| C | 0.127275  | 0.986202  | -0.079625 |
| C | -2.292959 | 0.210003  | -0.267880 |
| N | -1.672387 | 0.302920  | 1.456011  |
| N | -0.774894 | 1.868998  | -0.623743 |
| N | -2.002797 | 1.477237  | -0.703521 |
| O | 0.812520  | -1.344127 | 0.172256  |
| C | 2.144161  | -1.603991 | -0.052354 |
| C | 2.905551  | -1.074253 | -1.094666 |
| C | 2.725205  | -2.478168 | 0.871287  |
| C | 4.252916  | -1.429803 | -1.199801 |
| H | 2.491874  | -0.374837 | -1.810881 |
| C | 4.067449  | -2.819949 | 0.753726  |
| H | 2.109767  | -2.872832 | 1.673240  |
| C | 4.842675  | -2.296873 | -0.284399 |
| H | 4.841282  | -1.008674 | -2.009235 |
| H | 4.509207  | -3.497498 | 1.477632  |
| H | 5.890925  | -2.560594 | -0.374469 |
| H | -1.512133 | -1.789461 | -0.066654 |
| C | 1.508954  | 1.545671  | 0.118308  |
| C | 2.226245  | 1.349583  | 1.298168  |
| N | 2.016517  | 2.156859  | -0.957753 |
| C | 3.537545  | 1.814515  | 1.357047  |
| H | 1.776284  | 0.836372  | 2.139268  |
| C | 3.274433  | 2.599705  | -0.886006 |
| C | 4.077149  | 2.451077  | 0.244389  |
| H | 4.127054  | 1.674683  | 2.257241  |
| H | 3.660325  | 3.090262  | -1.775634 |
| H | 5.095105  | 2.824044  | 0.243366  |
| C | -3.748923 | -0.098364 | -0.157472 |
| C | -4.667196 | 0.918717  | 0.115918  |
| N | -4.096728 | -1.382136 | -0.295940 |
| C | -6.010962 | 0.581474  | 0.233140  |
| H | -4.324639 | 1.940889  | 0.229563  |
| C | -5.391328 | -1.692713 | -0.178824 |
| C | -6.385123 | -0.751656 | 0.081526  |
| H | -6.752666 | 1.345028  | 0.443279  |
| H | -5.644678 | -2.742501 | -0.299413 |
| H | -7.420636 | -1.061269 | 0.165815  |

Structure **TS2syn\_b**

|   |           |           |           |
|---|-----------|-----------|-----------|
| C | -1.358945 | -0.970796 | -0.617861 |
|---|-----------|-----------|-----------|

|   |           |           |           |
|---|-----------|-----------|-----------|
| C | 0.091857  | -0.490990 | -0.601057 |
| H | -1.641711 | -1.332369 | -1.608201 |
| H | 0.488315  | -0.459111 | -1.619013 |
| N | -0.581589 | 0.714958  | 1.492308  |
| C | 0.131263  | 0.968475  | -0.079537 |
| C | -2.287630 | 0.181068  | -0.261756 |
| N | -1.690959 | 0.373651  | 1.454473  |
| N | -0.764640 | 1.814758  | -0.694749 |
| N | -1.989886 | 1.419143  | -0.775082 |
| O | 0.843603  | -1.371737 | 0.203305  |
| C | 2.167651  | -1.623687 | -0.060036 |
| C | 2.903171  | -1.067232 | -1.107264 |
| C | 2.773023  | -2.520640 | 0.825049  |
| C | 4.247884  | -1.417240 | -1.255473 |
| H | 2.471559  | -0.351203 | -1.796074 |
| C | 4.112205  | -2.857274 | 0.665443  |
| H | 2.178283  | -2.936681 | 1.631771  |
| C | 4.861277  | -2.306623 | -0.377619 |
| H | 4.815372  | -0.974778 | -2.068386 |
| H | 4.572318  | -3.552750 | 1.360425  |
| H | 5.907173  | -2.566374 | -0.500646 |
| H | -1.492467 | -1.790968 | 0.089585  |
| C | 1.495067  | 1.562927  | 0.125572  |
| C | 2.008346  | 2.450291  | -0.822267 |
| N | 2.184667  | 1.143180  | 1.190287  |
| C | 3.313846  | 2.904963  | -0.661142 |
| H | 1.398007  | 2.758807  | -1.663300 |
| C | 3.433429  | 1.592787  | 1.335472  |
| C | 4.046801  | 2.465061  | 0.437096  |
| C | 3.750170  | 3.587279  | -1.383258 |
| H | 3.971507  | 1.234887  | 2.209551  |
| H | 5.068455  | 2.788428  | 0.601597  |
| C | -3.745181 | -0.119193 | -0.153472 |
| C | -4.664677 | 0.912133  | 0.054729  |
| N | -4.093825 | -1.408090 | -0.227570 |
| C | -6.010462 | 0.583528  | 0.173266  |
| H | -4.321456 | 1.938440  | 0.118733  |
| C | -5.390352 | -1.710217 | -0.109328 |
| C | -6.385373 | -0.755313 | 0.088457  |
| H | -6.753134 | 1.358196  | 0.333434  |
| H | -5.644377 | -2.764613 | -0.176614 |
| H | -7.422411 | -1.058671 | 0.176663  |

Structure **int2\_a**

|   |           |           |           |
|---|-----------|-----------|-----------|
| C | 0.903536  | -0.738603 | -1.206417 |
| C | 1.588969  | -0.732594 | 0.146543  |
| C | -1.090813 | -1.144734 | 0.206661  |
| C | -0.403037 | -1.503661 | -1.076161 |
| H | 1.562363  | -1.235371 | -1.917037 |
| H | -1.059333 | -1.334334 | -1.930082 |
| H | -0.170249 | -2.577022 | -1.053445 |
| N | -0.439347 | -0.846000 | 1.274587  |
| N | 0.956775  | -0.868688 | 1.258340  |
| O | 0.762128  | 0.587813  | -1.734823 |
| C | -0.035885 | 1.451788  | -1.005122 |
| C | -1.385455 | 1.577199  | -1.334165 |
| C | 0.521031  | 2.205356  | 0.027448  |
| C | -2.194912 | 2.434415  | -0.590294 |
| H | -1.791826 | 0.992560  | -2.153989 |
| C | -0.295969 | 3.060798  | 0.765542  |
| H | 1.580653  | 2.111325  | 0.247177  |
| C | -1.655064 | 3.170184  | 0.465429  |
| H | -3.249046 | 2.522682  | -0.835417 |

|                         |           |           |           |                         |           |           |           |
|-------------------------|-----------|-----------|-----------|-------------------------|-----------|-----------|-----------|
| H                       | 0.131355  | 3.644136  | 1.575003  | H                       | -5.295334 | 0.366218  | -1.169732 |
| H                       | -2.287648 | 3.834246  | 1.045407  | H                       | -6.583708 | -1.403696 | 0.015933  |
| C                       | 3.067873  | -0.579875 | 0.202916  | <b>Structure int2_c</b> |           |           |           |
| C                       | 3.708712  | -0.248870 | 1.402393  | C                       | 0.899002  | -0.495125 | -1.307483 |
| N                       | 3.728696  | -0.756996 | -0.949662 | C                       | 1.593562  | -0.731665 | 0.026432  |
| C                       | 5.092317  | -0.118798 | 1.402382  | C                       | -1.089192 | -1.153661 | 0.012387  |
| H                       | 3.120595  | -0.094905 | 2.299188  | C                       | -0.399810 | -1.284232 | -1.311599 |
| C                       | 5.057218  | -0.626452 | -0.935930 | H                       | 1.543646  | -0.861531 | -2.108113 |
| C                       | 5.786120  | -0.312684 | 0.210136  | H                       | -1.055500 | -0.972931 | -2.125066 |
| H                       | 5.619965  | 0.137166  | 2.315346  | H                       | -0.160019 | -2.343763 | -1.474344 |
| H                       | 5.563531  | -0.779318 | -1.885268 | N                       | -0.439227 | -1.354745 | -1.114928 |
| H                       | 6.864985  | -0.218239 | 0.161312  | N                       | 0.958071  | -1.047319 | 1.097634  |
| C                       | -2.577975 | -1.093664 | 0.272802  | O                       | 0.739426  | 0.898544  | -1.605629 |
| C                       | -3.234645 | -0.797980 | 1.472732  | C                       | -0.054143 | 1.624041  | -0.732274 |
| N                       | -3.229389 | -1.324834 | -0.874205 | C                       | -1.406980 | 1.795944  | -1.022880 |
| C                       | -4.621964 | -0.726374 | 1.469789  | C                       | 0.513123  | 2.195275  | 0.405625  |
| H                       | -2.656057 | -0.628278 | 2.372569  | C                       | -2.210100 | 2.513493  | -0.137688 |
| C                       | -4.563033 | -1.258147 | -0.862390 | H                       | -1.820414 | 1.354745  | -1.924778 |
| C                       | -5.305840 | -0.958197 | 0.277978  | C                       | -0.297954 | 2.911507  | 1.284944  |
| H                       | -5.161819 | -0.493962 | 2.381940  | H                       | 1.575282  | 2.069842  | 0.595020  |
| H                       | -5.060942 | -1.450645 | -1.808996 | C                       | -1.660378 | 3.063856  | 1.020890  |
| H                       | -6.387804 | -0.911556 | 0.227816  | H                       | -3.266902 | 2.637788  | -0.353691 |
| <b>Structure int2_b</b> |           |           |           | H                       | 0.136531  | 3.352487  | 2.176431  |
| C                       | 0.674115  | 0.063453  | -0.571610 | H                       | -2.288301 | 3.618950  | 1.710129  |
| C                       | 1.403650  | -1.154340 | -0.046780 | C                       | 3.079298  | -0.617691 | 0.090368  |
| C                       | -1.288343 | -1.371573 | -0.245441 | C                       | 3.749341  | 0.175554  | -0.847220 |
| C                       | -0.631668 | -0.407443 | -1.187603 | N                       | 3.716676  | -1.277488 | 1.068760  |
| H                       | 1.312403  | 0.563360  | -1.301900 | C                       | 5.134389  | 0.292284  | -0.758893 |
| H                       | -1.309322 | 0.420247  | -1.400079 | H                       | 3.195908  | 0.705298  | -1.615389 |
| H                       | -0.422597 | -0.913098 | -2.140154 | C                       | 5.042540  | -1.164038 | 1.134766  |
| N                       | -0.612486 | -2.152336 | 0.521479  | C                       | 5.799912  | -0.392329 | 0.250632  |
| N                       | 0.778500  | -2.182745 | 0.399749  | H                       | 5.678578  | 0.908063  | -1.467262 |
| O                       | 0.463901  | 0.903286  | 0.560912  | H                       | 5.530730  | -1.718470 | 1.932274  |
| C                       | 0.113556  | 2.211280  | 0.357423  | H                       | 6.877225  | -0.338145 | 0.358633  |
| C                       | 0.018502  | 2.822290  | -0.894753 | C                       | -2.576605 | -1.133872 | 0.084002  |
| C                       | -0.144858 | 2.945908  | 1.520327  | C                       | -3.236418 | -1.078825 | 1.316859  |
| C                       | -0.331228 | 4.173859  | -0.968190 | N                       | -3.225391 | -1.152923 | -1.087517 |
| H                       | 0.206122  | 2.274142  | -1.810401 | C                       | -4.624593 | -1.025077 | 1.324349  |
| C                       | -0.491288 | 4.288407  | 1.429585  | H                       | -2.660167 | -1.076522 | 2.233998  |
| H                       | -0.064873 | 2.446320  | 2.480403  | C                       | -4.559659 | -1.106249 | -1.066247 |
| C                       | -0.587029 | 4.913080  | 0.182611  | C                       | -5.305711 | -1.036080 | 0.108827  |
| H                       | -0.403805 | 4.643086  | -1.944385 | H                       | -5.167082 | -0.976498 | 2.262845  |
| H                       | -0.687679 | 4.849968  | 2.337567  | H                       | -5.055373 | -1.122852 | -2.033208 |
| H                       | -0.859075 | 5.960770  | 0.112673  | H                       | -6.388204 | -0.994500 | 0.066134  |
| C                       | 2.890522  | -1.172467 | -0.051559 | <b>Structure int2_d</b> |           |           |           |
| C                       | 3.601889  | -2.265547 | 0.456424  | C                       | 0.680925  | 0.056158  | -0.570632 |
| N                       | 3.489504  | -0.084386 | -0.553661 | C                       | 1.427792  | -1.144509 | -0.020698 |
| C                       | 4.990043  | -2.223490 | 0.427722  | C                       | -1.264418 | -1.389693 | -0.206432 |
| H                       | 3.064544  | -3.114623 | 0.861245  | C                       | -0.619708 | -0.444095 | -1.174550 |
| C                       | 4.824320  | -0.053909 | -0.568582 | H                       | 1.296358  | 0.545375  | -1.331249 |
| C                       | 5.619664  | -1.095330 | -0.094573 | H                       | -1.305662 | 0.371383  | -1.406572 |
| H                       | 5.572486  | -3.055268 | 0.810161  | H                       | -0.405287 | -0.970940 | -2.114201 |
| H                       | 5.278753  | 0.843220  | -0.980186 | N                       | -0.579823 | -2.138492 | 0.583486  |
| H                       | 6.700236  | -1.018220 | -0.134781 | N                       | 0.813277  | -2.162278 | 0.459938  |
| C                       | -2.772563 | -1.427523 | -0.146672 | O                       | 0.469529  | 0.927533  | 0.535738  |
| C                       | -3.407070 | -2.472509 | 0.535189  | C                       | 0.076200  | 2.220047  | 0.298257  |
| N                       | -3.446234 | -0.437178 | -0.747247 | C                       | -0.027409 | 2.796999  | -0.968785 |
| C                       | -4.794596 | -2.473927 | 0.604993  | C                       | -0.207586 | 2.973322  | 1.442536  |
| H                       | -2.812267 | -3.256945 | 0.986958  | C                       | -0.414918 | 4.136109  | -1.076296 |
| C                       | -4.779459 | -0.451997 | -0.674524 | H                       | 0.179689  | 2.233139  | -1.870650 |
| C                       | -5.500621 | -1.442527 | -0.010440 | C                       | -0.591055 | 4.302942  | 1.317728  |
| H                       | -5.317303 | -3.269428 | 1.125877  | H                       | -0.118570 | 2.498729  | 2.414353  |

|   |           |           |           |
|---|-----------|-----------|-----------|
| C | -0.697433 | 4.894370  | 0.055511  |
| H | -0.495409 | 4.579672  | -2.063695 |
| H | -0.808078 | 4.880413  | 2.210830  |
| H | -0.998753 | 5.931892  | -0.040678 |
| C | 2.916721  | -1.142116 | -0.037613 |
| C | 3.599894  | 0.077694  | -0.013426 |
| N | 3.544023  | -2.326731 | -0.053599 |
| C | 4.992135  | 0.065012  | 0.003479  |
| H | 3.056381  | 1.016709  | 0.013960  |
| C | 4.876726  | -2.323297 | -0.048737 |
| C | 5.648593  | -1.159683 | -0.018390 |
| H | 5.548907  | 0.995642  | 0.033217  |
| H | 5.357508  | -3.297880 | -0.072720 |
| H | 6.730785  | -1.222910 | -0.013681 |
| C | -2.747948 | -1.459837 | -0.108589 |
| C | -3.371426 | -2.498072 | 0.593121  |
| N | -3.431238 | -0.488637 | -0.729159 |
| C | -4.758971 | -2.512739 | 0.662236  |
| H | -2.768557 | -3.267341 | 1.060069  |
| C | -4.764251 | -0.516076 | -0.656845 |
| C | -5.475252 | -1.501063 | 0.026352  |
| H | -5.273714 | -3.303449 | 1.198114  |
| H | -5.288451 | 0.286654  | -1.168358 |
| H | -6.558711 | -1.473214 | 0.051326  |

Structure **int2\_e**

|   |           |           |           |
|---|-----------|-----------|-----------|
| C | -0.254159 | 0.027279  | 0.097067  |
| C | -0.519491 | -1.464805 | 0.113565  |
| C | 2.078429  | -0.730703 | -0.103780 |
| C | 1.067481  | 0.250658  | -0.622507 |
| H | -0.219165 | 0.383495  | 1.136216  |
| H | 0.915870  | 0.073108  | -1.696758 |
| H | 1.436431  | 1.269332  | -0.506535 |
| N | 1.754095  | -1.905846 | 0.302384  |
| N | 0.423463  | -2.332141 | 0.166716  |
| O | -1.310611 | 0.650732  | -0.608348 |
| C | -1.675647 | 1.924488  | -0.273788 |
| C | -0.918907 | 2.776385  | 0.533107  |
| C | -2.889012 | 2.361214  | -0.816644 |
| C | -1.393341 | 4.064156  | 0.797563  |
| H | 0.031917  | 2.465376  | 0.950680  |
| C | -3.343846 | 3.646882  | -0.548825 |
| H | -3.457720 | 1.677130  | -1.438316 |
| C | -2.599599 | 4.507528  | 0.263197  |
| H | -0.800788 | 4.722166  | 1.425468  |
| H | -4.287480 | 3.976581  | -0.972198 |
| H | -2.956989 | 5.509885  | 0.473247  |
| C | -1.919702 | -1.967142 | 0.102171  |
| C | -2.266167 | -3.104284 | -0.629006 |
| N | -2.787848 | -1.281904 | 0.858754  |
| C | -3.584244 | -3.547391 | -0.575217 |
| H | -1.515252 | -3.614333 | -1.221650 |
| C | -4.044848 | -1.727422 | 0.911767  |
| C | -4.494478 | -2.847254 | 0.211093  |
| H | -3.893976 | -4.422090 | -1.137630 |
| H | -4.727665 | -1.162222 | 1.540661  |
| H | -5.531703 | -3.154223 | 0.283900  |
| C | 3.518699  | -0.354193 | -0.047767 |
| C | 4.496681  | -1.303349 | 0.271376  |
| N | 3.809202  | 0.923275  | -0.326248 |
| C | 5.824843  | -0.898551 | 0.314431  |
| H | 4.205170  | -2.327023 | 0.472194  |
| C | 5.090299  | 1.298112  | -0.286250 |

|   |          |           |           |
|---|----------|-----------|-----------|
| C | 6.133430 | 0.430261  | 0.030765  |
| H | 6.607480 | -1.608872 | 0.559848  |
| H | 5.292007 | 2.340654  | -0.517063 |
| H | 7.155844 | 0.790274  | 0.049565  |

Structure **int2\_f**

|   |           |           |           |
|---|-----------|-----------|-----------|
| C | 0.648185  | 0.028781  | -0.571414 |
| C | 1.327939  | -1.216465 | -0.048264 |
| C | -1.378147 | -1.321307 | -0.218300 |
| C | -0.687973 | -0.381575 | -1.169914 |
| H | 1.298077  | 0.490766  | -1.316161 |
| H | -1.306025 | 0.498009  | -1.361191 |
| H | -0.512884 | -0.880178 | -2.132815 |
| N | -0.725795 | -2.137620 | 0.528731  |
| N | 0.664634  | -2.220573 | 0.396584  |
| O | 0.494013  | 0.888024  | 0.553767  |
| C | 0.248663  | 2.218806  | 0.340350  |
| C | 0.177465  | 2.821485  | -0.917302 |
| C | 0.073716  | 2.984164  | 1.498822  |
| C | -0.063414 | 4.196145  | -1.000895 |
| H | 0.301307  | 2.250970  | -1.830246 |
| C | -0.165187 | 4.349114  | 1.397870  |
| H | 0.132871  | 2.490228  | 2.463274  |
| C | -0.235232 | 4.965955  | 0.145265  |
| H | -0.117633 | 4.658871  | -1.981337 |
| H | -0.297017 | 4.934569  | 2.302401  |
| H | -0.423032 | 6.031408  | 0.067608  |
| C | 2.813112  | -1.288472 | -0.052751 |
| C | 3.483998  | -2.402960 | 0.463224  |
| N | 3.450709  | -0.226020 | -0.562070 |
| C | 4.872817  | -2.411542 | 0.434232  |
| H | 2.915988  | -3.228673 | 0.874433  |
| C | 4.785713  | -0.243893 | -0.576664 |
| C | 5.542707  | -1.310472 | -0.095609 |
| H | 5.424715  | -3.261197 | 0.822556  |
| H | 5.272389  | 0.633508  | -0.993860 |
| H | 6.625369  | -1.272809 | -0.135973 |
| C | -2.866389 | -1.313931 | -0.111892 |
| C | -3.636068 | -0.868444 | -1.190498 |
| N | -3.410779 | -1.762641 | 1.028871  |
| C | -5.024462 | -0.901469 | -1.084466 |
| H | -3.165500 | -0.517382 | -2.102324 |
| C | -4.739543 | -1.776027 | 1.122037  |
| C | -5.592863 | -1.360996 | 0.096931  |
| H | -5.645188 | -0.571814 | -1.910919 |
| H | -5.149386 | -2.134705 | 2.062816  |
| H | -6.667765 | -1.399172 | 0.232214  |

Structure **int2\_g**

|   |           |           |           |
|---|-----------|-----------|-----------|
| C | 0.880903  | -0.801536 | -1.169864 |
| C | 1.558882  | -0.751473 | 0.184045  |
| C | -1.135271 | -1.105305 | 0.253527  |
| C | -0.447413 | -1.526440 | -1.016037 |
| H | 1.528579  | -1.349604 | -1.852511 |
| H | -1.070797 | -1.350112 | -1.894568 |
| H | -0.244852 | -2.604864 | -0.967741 |
| N | -0.478486 | -0.786039 | 1.310674  |
| N | 0.919791  | -0.833383 | 1.296245  |
| O | 0.774150  | 0.498064  | -1.763683 |
| C | 0.022951  | 1.432697  | -1.071858 |
| C | -1.316860 | 1.618320  | -1.412634 |
| C | 0.621229  | 2.205824  | -0.077777 |
| C | -2.073035 | 2.566605  | -0.725338 |

|   |           |           |           |
|---|-----------|-----------|-----------|
| H | -1.752967 | 1.022319  | -2.208929 |
| C | -0.144217 | 3.149080  | 0.606737  |
| H | 1.673683  | 2.064289  | 0.150375  |
| C | -1.491823 | 3.327115  | 0.289753  |
| H | -3.118146 | 2.707578  | -0.982939 |
| H | 0.316098  | 3.749681  | 1.384836  |
| H | -2.083354 | 4.062478  | 0.825269  |
| C | 3.039878  | -0.619939 | 0.239609  |
| C | 3.682049  | -0.249698 | 1.426638  |
| N | 3.700581  | -0.854552 | -0.902602 |
| C | 5.067563  | -0.140604 | 1.425678  |
| H | 3.093678  | -0.049910 | 2.314210  |
| C | 5.030821  | -0.743563 | -0.890072 |
| C | 5.761274  | -0.393743 | 0.244628  |
| H | 5.596709  | 0.144678  | 2.329007  |
| H | 5.537223  | -0.943136 | -1.830605 |
| H | 6.841534  | -0.317415 | 0.195348  |
| C | -2.625618 | -1.051908 | 0.313210  |
| C | -3.386564 | -1.795782 | -0.593133 |
| N | -3.181032 | -0.281420 | 1.260271  |
| C | -4.776250 | -1.738110 | -0.511663 |
| H | -2.909977 | -2.420830 | -1.339944 |
| C | -4.509838 | -0.226593 | 1.320553  |
| C | -5.355026 | -0.932784 | 0.460747  |
| H | -5.389470 | -2.312342 | -1.198105 |
| H | -4.927854 | 0.414507  | 2.092691  |
| H | -6.431085 | -0.847052 | 0.560482  |

Structure **int2\_h**

|   |           |           |           |
|---|-----------|-----------|-----------|
| C | 0.002708  | -0.051869 | -1.108946 |
| C | 0.445907  | -1.168755 | -0.178939 |
| C | -2.170543 | -0.440845 | -0.002879 |
| C | -1.254243 | 0.612287  | -0.559782 |
| H | -0.228782 | -0.516506 | -2.075113 |
| H | -1.020404 | 1.334125  | 0.231838  |
| H | -1.764735 | 1.165992  | -1.347373 |
| N | -1.761033 | -1.568426 | 0.456185  |
| N | -0.382914 | -1.833060 | 0.539842  |
| O | 1.010489  | 0.891503  | -1.424007 |
| C | 1.677583  | 1.592671  | -0.456668 |
| C | 2.608152  | 2.515068  | -0.951349 |
| C | 1.513686  | 1.444094  | 0.923645  |
| C | 3.368306  | 3.279281  | -0.075108 |
| H | 2.719394  | 2.611620  | -2.026506 |
| C | 2.287277  | 2.219439  | 1.792446  |
| H | 0.805637  | 0.740623  | 1.345051  |
| C | 3.213188  | 3.136820  | 1.306819  |
| H | 4.086556  | 3.988899  | -0.473673 |
| H | 2.152897  | 2.094099  | 2.862294  |
| H | 3.806371  | 3.733359  | 1.991456  |
| C | 1.876343  | -1.576217 | -0.117959 |
| C | 2.448706  | -1.981068 | 1.090582  |
| N | 2.543966  | -1.546779 | -1.277708 |
| C | 3.784334  | -2.366483 | 1.091821  |
| H | 1.853084  | -1.977839 | 1.996627  |
| C | 3.823694  | -1.930048 | -1.262797 |
| C | 4.490049  | -2.340082 | -0.108819 |
| H | 4.266880  | -2.677840 | 2.012438  |
| H | 4.341582  | -1.906799 | -2.217886 |
| H | 5.533942  | -2.628778 | -0.156819 |
| C | -3.637423 | -0.177341 | 0.035250  |
| C | -4.524486 | -1.111608 | 0.582039  |
| N | -4.037663 | 0.997460  | -0.467872 |

|   |           |           |           |
|---|-----------|-----------|-----------|
| C | -5.880599 | -0.810590 | 0.592725  |
| H | -4.142805 | -2.041462 | 0.985557  |
| C | -5.343142 | 1.277633  | -0.444565 |
| C | -6.304144 | 0.409508  | 0.069759  |
| H | -6.595675 | -1.514291 | 1.006006  |
| H | -5.634533 | 2.239395  | -0.858004 |
| H | -7.351927 | 0.687635  | 0.059380  |

Structure **int2\_i**

|   |           |           |           |
|---|-----------|-----------|-----------|
| C | -0.021764 | -0.026833 | -1.044108 |
| C | 0.428191  | -1.209044 | -0.200325 |
| C | -2.172223 | -0.452531 | 0.028670  |
| C | -1.213784 | 0.635987  | -0.367422 |
| H | -0.350780 | -0.423835 | -2.013743 |
| H | -0.921175 | 1.203201  | 0.524119  |
| H | -1.702474 | 1.331214  | -1.049440 |
| N | -1.789213 | -1.638455 | 0.342942  |
| N | -0.418159 | -1.919927 | 0.450262  |
| O | 1.006698  | 0.883112  | -1.389507 |
| C | 1.685453  | 1.607617  | -0.442161 |
| C | 2.486485  | 2.630332  | -0.962017 |
| C | 1.656964  | 1.374290  | 0.935048  |
| C | 3.254359  | 3.415327  | -0.110288 |
| H | 2.492590  | 2.789286  | -2.035487 |
| C | 2.433169  | 2.173842  | 1.778753  |
| H | 1.056595  | 0.584273  | 1.370805  |
| C | 3.231804  | 3.193026  | 1.269095  |
| H | 3.871872  | 4.205166  | -0.526262 |
| H | 2.405018  | 1.985216  | 2.847318  |
| H | 3.829288  | 3.806770  | 1.934551  |
| C | 1.864353  | -1.607358 | -0.140639 |
| C | 2.659672  | -1.529517 | -1.287015 |
| N | 2.320917  | -2.052147 | 1.037779  |
| C | 3.987416  | -1.940573 | -1.203872 |
| H | 2.247919  | -1.157463 | -2.218327 |
| C | 3.597018  | -2.432990 | 1.104418  |
| C | 4.471133  | -2.398770 | 0.016436  |
| H | 4.629722  | -1.899683 | -2.077296 |
| H | 3.942891  | -2.779578 | 2.074801  |
| H | 5.499501  | -2.721506 | 0.132952  |
| C | -3.635113 | -0.170894 | 0.052720  |
| C | -4.545047 | -1.131123 | 0.509900  |
| N | -4.010697 | 1.042232  | -0.372624 |
| C | -5.897960 | -0.815904 | 0.509003  |
| H | -4.182795 | -2.091220 | 0.856586  |
| C | -5.313554 | 1.334950  | -0.361551 |
| C | -6.295973 | 0.443277  | 0.064568  |
| H | -6.630088 | -1.538556 | 0.854102  |
| H | -5.584893 | 2.327368  | -0.711293 |
| H | -7.340293 | 0.733851  | 0.048868  |

Structure **int2\_j**

|   |           |           |           |
|---|-----------|-----------|-----------|
| C | -0.346590 | 0.014923  | 0.183725  |
| C | -0.825276 | -1.423694 | 0.144818  |
| C | 1.828163  | -0.987770 | -0.151984 |
| C | 0.904683  | 0.075719  | -0.679671 |
| H | -0.099433 | 0.240278  | 1.233826  |
| H | 0.641457  | -0.135459 | -1.725650 |
| H | 1.397951  | 1.046194  | -0.643196 |
| N | 1.384217  | -2.093333 | 0.332715  |
| N | 0.020148  | -2.385877 | 0.191604  |
| O | -1.374860 | 0.865115  | -0.268884 |
| C | -1.291225 | 2.207888  | -0.007396 |

|   |           |           |           |
|---|-----------|-----------|-----------|
| C | -0.272262 | 2.812002  | 0.730458  |
| C | -2.336143 | 2.976778  | -0.530873 |
| C | -0.314062 | 4.193374  | 0.941936  |
| H | 0.551620  | 2.239618  | 1.140476  |
| C | -2.361648 | 4.348612  | -0.312671 |
| H | -3.114767 | 2.478911  | -1.100038 |
| C | -1.349342 | 4.967213  | 0.426917  |
| H | 0.480929  | 4.658912  | 1.515914  |
| H | -3.176602 | 4.937678  | -0.721406 |
| H | -1.369439 | 6.038459  | 0.595714  |
| C | -2.270984 | -1.793356 | 0.061185  |
| C | -3.079838 | -1.315263 | -0.974474 |
| N | -2.712005 | -2.638144 | 1.002406  |
| C | -4.400616 | -1.746984 | -1.037706 |
| H | -2.676661 | -0.630247 | -1.710459 |
| C | -3.987482 | -3.031172 | 0.936533  |
| C | -4.869638 | -2.620550 | -0.060940 |
| H | -5.050935 | -1.404792 | -1.836040 |
| H | -4.319034 | -3.708123 | 1.719403  |
| H | -5.892981 | -2.978472 | -0.065595 |
| C | 3.299432  | -0.762337 | -0.135428 |
| C | 4.181462  | -1.813623 | 0.139538  |
| N | 3.713043  | 0.483745  | -0.401795 |
| C | 5.545340  | -1.548846 | 0.152249  |
| H | 3.790789  | -2.805944 | 0.329653  |
| C | 5.026586  | 0.723339  | -0.390556 |
| C | 5.982084  | -0.253624 | -0.117024 |
| H | 6.256471  | -2.340971 | 0.362264  |
| H | 5.329426  | 1.743790  | -0.609121 |
| H | 7.036404  | -0.001263 | -0.120983 |

Structure **int2\_k**

|   |           |           |           |
|---|-----------|-----------|-----------|
| C | -0.150506 | 0.096544  | -0.002998 |
| C | -0.375567 | -1.399837 | 0.093826  |
| C | 2.210654  | -0.608229 | -0.092600 |
| C | 1.185885  | 0.318291  | -0.693864 |
| H | -0.155893 | 0.516551  | 1.011303  |
| H | 1.066679  | 0.093568  | -1.763202 |
| H | 1.493663  | 1.361486  | -0.603809 |
| N | 1.905983  | -1.772323 | 0.353841  |
| N | 0.586663  | -2.238641 | 0.210306  |
| O | -1.186584 | 0.661124  | -0.787401 |
| C | -1.836389 | 1.777318  | -0.332135 |
| C | -1.228785 | 2.749924  | 0.462802  |
| C | -3.159621 | 1.930815  | -0.752435 |
| C | -1.964028 | 3.874014  | 0.845706  |
| H | -0.193677 | 2.652675  | 0.773705  |
| C | -3.876568 | 3.060734  | -0.372235 |
| H | -3.605961 | 1.153270  | -1.363998 |
| C | -3.284523 | 4.037093  | 0.433111  |
| H | -1.489104 | 4.629114  | 1.464207  |
| H | -4.905564 | 3.174177  | -0.698944 |
| H | -3.846987 | 4.914868  | 0.732973  |
| C | -1.765286 | -1.928095 | 0.081913  |
| C | -2.073015 | -3.132674 | -0.552357 |
| N | -2.667983 | -1.186280 | 0.737636  |
| C | -3.388539 | -3.583928 | -0.507235 |
| H | -1.295361 | -3.686205 | -1.066287 |
| C | -3.922828 | -1.637833 | 0.782860  |
| C | -4.335266 | -2.823293 | 0.173310  |
| H | -3.669245 | -4.510923 | -0.996388 |
| H | -4.634401 | -1.022510 | 1.327462  |
| H | -5.372225 | -3.133941 | 0.233363  |

|   |          |           |           |
|---|----------|-----------|-----------|
| C | 3.639608 | -0.184107 | -0.020156 |
| C | 4.126819 | 0.768404  | -0.919446 |
| N | 4.411792 | -0.764071 | 0.910053  |
| C | 5.472891 | 1.121420  | -0.859223 |
| H | 3.476556 | 1.214865  | -1.663685 |
| C | 5.693659 | -0.405893 | 0.966577  |
| C | 6.276487 | 0.526909  | 0.105503  |
| H | 5.880126 | 1.849001  | -1.553287 |
| H | 6.290402 | -0.884819 | 1.738674  |
| H | 7.327980 | 0.773578  | 0.198716  |

Structure **int2\_l**

|   |           |           |           |
|---|-----------|-----------|-----------|
| C | 0.658552  | 0.025563  | -0.567513 |
| C | 1.361748  | -1.198649 | -0.015669 |
| C | -1.344944 | -1.343584 | -0.177524 |
| C | -0.669294 | -0.423147 | -1.157413 |
| H | 1.284558  | 0.480129  | -1.340592 |
| H | -1.299595 | 0.441442  | -1.375201 |
| H | -0.483846 | -0.946611 | -2.104900 |
| N | -0.680292 | -2.122231 | 0.597572  |
| N | 0.712941  | -2.193533 | 0.466059  |
| O | 0.494530  | 0.916425  | 0.529593  |
| C | 0.195366  | 2.232181  | 0.278747  |
| C | 0.120138  | 2.799138  | -0.994658 |
| C | -0.021685 | 3.017590  | 1.415858  |
| C | -0.169573 | 4.161674  | -1.115912 |
| H | 0.276157  | 2.211756  | -1.891847 |
| C | -0.308526 | 4.369934  | 1.277292  |
| H | 0.042699  | 2.549636  | 2.392786  |
| C | -0.384280 | 4.952145  | 0.008542  |
| H | -0.227624 | 4.597661  | -2.108209 |
| H | -0.473772 | 4.972552  | 2.164814  |
| H | -0.609777 | 6.007709  | -0.098130 |
| C | 2.849882  | -1.246824 | -0.033525 |
| C | 3.576022  | -0.051949 | -0.024466 |
| N | 3.434397  | -2.453078 | -0.035599 |
| C | 4.967063  | -0.114468 | -0.007578 |
| H | 3.067237  | 0.906642  | -0.008715 |
| C | 4.766161  | -2.497541 | -0.031068 |
| C | 5.579343  | -1.361968 | -0.014555 |
| H | 5.556844  | 0.795880  | 0.010637  |
| H | 5.211507  | -3.489025 | -0.043441 |
| H | 6.658579  | -1.463775 | -0.008848 |
| C | -2.833408 | -1.357104 | -0.074464 |
| C | -3.607849 | -0.965820 | -1.170358 |
| N | -3.372172 | -1.771619 | 1.081619  |
| C | -4.995715 | -1.018785 | -1.065341 |
| H | -3.141344 | -0.641804 | -2.094234 |
| C | -4.700718 | -1.804029 | 1.173294  |
| C | -5.558678 | -1.442816 | 0.131830  |
| H | -5.620198 | -0.731658 | -1.904706 |
| H | -5.106367 | -2.133643 | 2.126423  |
| H | -6.633062 | -1.494310 | 0.266750  |

Structure **int2\_m**

|   |           |           |           |
|---|-----------|-----------|-----------|
| C | -0.892413 | -0.579173 | 1.263427  |
| C | -1.581027 | -0.735620 | -0.083387 |
| C | 1.113421  | -1.123255 | -0.096456 |
| C | 0.420555  | -1.345905 | 1.219319  |
| H | -1.530277 | -1.012154 | 2.035585  |
| H | 1.045247  | -1.051699 | 2.064670  |
| H | 0.199365  | -2.416059 | 1.329277  |
| N | 0.459645  | -0.942450 | -1.187389 |



|                  |           |           |           |                  |           |           |           |
|------------------|-----------|-----------|-----------|------------------|-----------|-----------|-----------|
| N                | -0.939694 | -0.975681 | -1.169596 | H                | 4.243004  | -2.664882 | 2.094246  |
| O                | -0.754024 | 0.789774  | 1.661452  | H                | 4.302016  | -2.002814 | -2.154787 |
| C                | 0.021524  | 1.597840  | 0.845941  | H                | 5.497735  | -2.686533 | -0.082651 |
| C                | 1.361776  | 1.804938  | 1.170952  | C                | -3.655299 | -0.148538 | 0.042991  |
| C                | -0.554119 | 2.225733  | -0.257193 | C                | -4.119714 | 1.169476  | 0.019801  |
| C                | 2.142827  | 2.625686  | 0.358746  | N                | -4.478642 | -1.206221 | 0.082444  |
| H                | 1.778688  | 1.325038  | 2.051467  | C                | -5.493390 | 1.397817  | 0.054561  |
| C                | 0.236346  | 3.041949  | -1.065441 | H                | -3.427190 | 2.003430  | -0.009358 |
| H                | -1.607410 | 2.071790  | -0.472906 | C                | -5.790136 | -0.973857 | 0.100136  |
| C                | 1.585010  | 3.238165  | -0.763944 | C                | -6.350904 | 0.305617  | 0.092034  |
| H                | 3.188629  | 2.783026  | 0.603544  | H                | -5.880890 | 2.411115  | 0.049641  |
| H                | -0.205173 | 3.529245  | -1.928910 | H                | -6.431060 | -1.851581 | 0.120248  |
| H                | 2.195992  | 3.873918  | -1.396362 | H                | -7.427603 | 0.430002  | 0.111944  |
| C                | -3.068338 | -0.638272 | -0.141527 |                  |           |           |           |
| C                | -3.751792 | 0.072121  | 0.851120  |                  |           |           |           |
| N                | -3.694129 | -1.233817 | -1.167498 | Structure int2_o |           |           |           |
| C                | -5.138711 | 0.171615  | 0.769478  | C                | -0.024350 | -0.075812 | -1.029436 |
| H                | -3.208204 | 0.552853  | 1.657588  | C                | 0.425722  | -1.212356 | -0.126567 |
| C                | -5.021514 | -1.138137 | -1.227055 | C                | -2.177801 | -0.442118 | 0.062379  |
| C                | -5.792208 | -0.447448 | -0.288868 | C                | -1.208735 | 0.627300  | -0.377497 |
| H                | -5.693478 | 0.723654  | 1.520892  | H                | -0.363717 | -0.521171 | -1.974135 |
| H                | -5.499853 | -1.639705 | -2.064518 | H                | -0.900435 | 1.230733  | 0.484491  |
| H                | -6.870277 | -0.403893 | -0.394058 | H                | -1.671735 | 1.296060  | -1.104855 |
| C                | 2.604175  | -1.107154 | -0.163069 | N                | -1.792741 | -1.604245 | 0.448346  |
| C                | 3.354777  | -1.723802 | 0.841886  | N                | -0.419701 | -1.878985 | 0.569759  |
| N                | 3.169629  | -0.493869 | -1.213395 | O                | 1.002290  | 0.812015  | -1.429216 |
| C                | 4.745030  | -1.703132 | 0.751951  | C                | 1.693412  | 1.581101  | -0.525958 |
| H                | 2.870398  | -2.224374 | 1.672768  | C                | 2.491378  | 2.573496  | -1.105386 |
| C                | 4.498915  | -0.471393 | -1.281558 | C                | 1.678387  | 1.417674  | 0.861350  |
| C                | 5.334548  | -1.058681 | -0.327910 | C                | 3.270389  | 3.397910  | -0.302416 |
| H                | 5.350423  | -2.181245 | 1.514779  | H                | 2.486537  | 2.678132  | -2.185500 |
| H                | 4.925641  | 0.042578  | -2.139289 | C                | 2.465817  | 2.256184  | 1.655461  |
| H                | 6.411630  | -1.006904 | -0.439468 | H                | 1.080769  | 0.652865  | 1.343410  |
|                  |           |           |           | C                | 3.261828  | 3.245510  | 1.086580  |
|                  |           |           |           | H                | 3.885754  | 4.163543  | -0.764221 |
|                  |           |           |           | H                | 2.448472  | 2.121669  | 2.732395  |
|                  |           |           |           | H                | 3.868261  | 3.889856  | 1.713908  |
|                  |           |           |           | C                | 1.859876  | -1.616764 | -0.058842 |
|                  |           |           |           | C                | 2.646074  | -1.601950 | -1.213907 |
|                  |           |           |           | N                | 2.322638  | -2.006284 | 1.136567  |
|                  |           |           |           | C                | 3.971476  | -2.018679 | -1.120750 |
|                  |           |           |           | H                | 2.229538  | -1.273940 | -2.159525 |
|                  |           |           |           | C                | 3.596218  | -2.393456 | 1.212026  |
|                  |           |           |           | H                | 4.461640  | -2.419858 | 0.116782  |
|                  |           |           |           | H                | 4.606877  | -2.025920 | -2.000109 |
|                  |           |           |           | H                | 3.947335  | -2.694490 | 2.195602  |
|                  |           |           |           | H                | 5.488414  | -2.744740 | 0.241061  |
|                  |           |           |           | C                | -3.643147 | -0.157626 | 0.053053  |
|                  |           |           |           | C                | -4.093160 | 1.162730  | 0.139192  |
|                  |           |           |           | N                | -4.478258 | -1.204595 | -0.017692 |
|                  |           |           |           | C                | -5.464814 | 1.403918  | 0.167933  |
|                  |           |           |           | H                | -3.391405 | 1.987328  | 0.199104  |
|                  |           |           |           | C                | -5.787231 | -0.958517 | -0.004702 |
|                  |           |           |           | C                | -6.334280 | 0.323382  | 0.090769  |
|                  |           |           |           | H                | -5.841301 | 2.418318  | 0.246599  |
|                  |           |           |           | H                | -6.437643 | -1.826630 | -0.074871 |
|                  |           |           |           | H                | -7.409798 | 0.458623  | 0.101142  |
|                  |           |           |           | Structure int2_p |           |           |           |
|                  |           |           |           | C                | -0.348989 | 0.014062  | 0.186037  |
|                  |           |           |           | C                | -0.821148 | -1.424522 | 0.121128  |
|                  |           |           |           | C                | 1.837784  | -0.973496 | -0.150122 |
|                  |           |           |           | C                | 0.907775  | 0.096020  | -0.669972 |
|                  |           |           |           | H                | -0.108879 | 0.223286  | 1.240691  |
| Structure int2_n |           |           |           |                  |           |           |           |
| C                | -0.015734 | -0.073991 | -1.071972 |                  |           |           |           |
| C                | 0.427983  | -1.165250 | -0.112752 |                  |           |           |           |
| C                | -2.186384 | -0.416043 | 0.045395  |                  |           |           |           |
| C                | -1.247775 | 0.626141  | -0.508475 |                  |           |           |           |
| H                | -0.284587 | -0.566178 | -2.014756 |                  |           |           |           |
| H                | -0.977878 | 1.336460  | 0.282116  |                  |           |           |           |
| H                | -1.730623 | 1.193652  | -1.305817 |                  |           |           |           |
| N                | -1.782465 | -1.531417 | 0.534280  |                  |           |           |           |
| N                | -0.403496 | -1.794667 | 0.633676  |                  |           |           |           |
| O                | 0.993588  | 0.843036  | -1.446466 |                  |           |           |           |
| C                | 1.701768  | 1.566598  | -0.525050 |                  |           |           |           |
| C                | 2.628893  | 2.456440  | -1.081629 |                  |           |           |           |
| C                | 1.580015  | 1.468791  | 0.863838  |                  |           |           |           |
| C                | 3.427982  | 3.238781  | -0.257601 |                  |           |           |           |
| H                | 2.706885  | 2.513293  | -2.162502 |                  |           |           |           |
| C                | 2.392396  | 2.261914  | 1.679694  |                  |           |           |           |
| H                | 0.877005  | 0.790835  | 1.332846  |                  |           |           |           |
| C                | 3.315347  | 3.147156  | 1.132689  |                  |           |           |           |
| H                | 4.143272  | 3.922554  | -0.703806 |                  |           |           |           |
| H                | 2.290761  | 2.175884  | 2.756972  |                  |           |           |           |
| H                | 3.939022  | 3.757854  | 1.776536  |                  |           |           |           |
| C                | 1.854027  | -1.587602 | -0.049974 |                  |           |           |           |
| C                | 2.428202  | -1.969232 | 1.165319  |                  |           |           |           |
| N                | 2.514704  | -1.596296 | -1.213876 |                  |           |           |           |
| C                | 3.758949  | -2.370773 | 1.168765  |                  |           |           |           |
| H                | 1.837840  | -1.936566 | 2.074195  |                  |           |           |           |
| C                | 3.789760  | -1.994942 | -1.196446 |                  |           |           |           |
| C                | 4.457826  | -2.383603 | -0.036158 |                  |           |           |           |

|                  |           |           |           |   |           |           |           |
|------------------|-----------|-----------|-----------|---|-----------|-----------|-----------|
| H                | 0.646362  | -0.087122 | -1.721515 | H | -3.202053 | -0.052796 | -0.176580 |
| H                | 1.368755  | 1.081993  | -0.599980 | C | -3.159127 | -3.861855 | -0.136141 |
| N                | 1.393360  | -2.090499 | 0.302436  | C | -4.376777 | -3.227129 | -0.363965 |
| N                | 0.028427  | -2.383096 | 0.150894  | H | -5.324864 | -1.295630 | -0.537881 |
| O                | -1.374839 | 0.867763  | -0.262755 | H | -3.098545 | -4.946211 | -0.099355 |
| C                | -1.305066 | 2.206246  | 0.026872  | H | -5.279128 | -3.809151 | -0.511792 |
| C                | -0.312567 | 2.799926  | 0.807589  | C | 3.389401  | -0.396229 | 0.060503  |
| C                | -2.336769 | 2.980304  | -0.514395 | C | 4.291355  | -1.466586 | -0.031976 |
| C                | -0.367334 | 4.176849  | 1.043874  | N | 3.771521  | 0.880650  | -0.077967 |
| H                | 0.499836  | 2.223391  | 1.234340  | C | 5.629878  | -1.191422 | -0.270980 |
| C                | -2.375791 | 4.347484  | -0.270610 | H | 3.931971  | -2.482279 | 0.081578  |
| H                | -3.094639 | 2.490166  | -1.117220 | C | 5.064801  | 1.130253  | -0.311568 |
| C                | -1.389816 | 4.955948  | 0.511704  | C | 6.032907  | 0.136684  | -0.415830 |
| H                | 0.406976  | 4.634429  | 1.651469  | H | 6.350337  | -1.999472 | -0.348101 |
| H                | -3.180449 | 4.940866  | -0.693193 | H | 5.336882  | 2.177171  | -0.418769 |
| H                | -1.420353 | 6.023616  | 0.700312  | H | 7.067696  | 0.397749  | -0.606343 |
| C                | -2.265605 | -1.798386 | 0.033533  |   |           |           |           |
| C                | -3.078770 | -1.306228 | -0.991996 |   |           |           |           |
| N                | -2.700441 | -2.661415 | 0.960989  |   |           |           |           |
| C                | -4.397672 | -1.743249 | -1.059861 |   |           |           |           |
| H                | -2.680685 | -0.606876 | -1.717125 |   |           |           |           |
| C                | -3.974145 | -3.059166 | 0.891225  |   |           |           |           |
| C                | -4.860400 | -2.635567 | -0.097260 |   |           |           |           |
| H                | -5.051341 | -1.390540 | -1.850831 |   |           |           |           |
| H                | -4.300762 | -3.750985 | 1.663081  |   |           |           |           |
| H                | -5.882071 | -2.998166 | -0.105881 |   |           |           |           |
| C                | 3.311056  | -0.738902 | -0.127567 |   |           |           |           |
| C                | 3.882528  | 0.166640  | -1.025777 |   |           |           |           |
| N                | 4.036656  | -1.439431 | 0.755757  |   |           |           |           |
| C                | 5.264525  | 0.340787  | -1.014688 |   |           |           |           |
| H                | 3.267590  | 0.713790  | -1.731999 |   |           |           |           |
| C                | 5.355376  | -1.251362 | 0.766356  |   |           |           |           |
| C                | 6.020713  | -0.378428 | -0.097709 |   |           |           |           |
| H                | 5.735816  | 1.028110  | -1.709272 |   |           |           |           |
| H                | 5.914283  | -1.824576 | 1.501651  |   |           |           |           |
| H                | 7.098145  | -0.272151 | -0.043200 |   |           |           |           |
| Structure int3_a |           |           |           |   |           |           |           |
| C                | -0.355423 | 0.044551  | -0.064390 |   |           |           |           |
| C                | -0.719106 | -1.210017 | 0.252746  |   |           |           |           |
| C                | 1.947521  | -0.620657 | 0.333020  |   |           |           |           |
| C                | 1.000351  | 0.557916  | 0.326726  |   |           |           |           |
| H                | 1.340823  | 1.312830  | -0.386067 |   |           |           |           |
| H                | 0.996875  | 1.036014  | 1.318268  |   |           |           |           |
| N                | 1.572164  | -1.817095 | 0.617122  |   |           |           |           |
| N                | 0.250971  | -2.029872 | 0.851816  |   |           |           |           |
| O                | -1.150510 | 0.843785  | -0.852352 |   |           |           |           |
| C                | -1.497978 | 2.081502  | -0.348165 |   |           |           |           |
| C                | -1.610859 | 2.318658  | 1.020795  |   |           |           |           |
| C                | -1.790107 | 3.077000  | -1.279388 |   |           |           |           |
| C                | -2.009931 | 3.582855  | 1.457061  |   |           |           |           |
| H                | -1.401184 | 1.524361  | 1.731289  |   |           |           |           |
| C                | -2.194087 | 4.330752  | -0.828736 |   |           |           |           |
| H                | -1.695871 | 2.855930  | -2.337479 |   |           |           |           |
| C                | -2.301526 | 4.590787  | 0.539523  |   |           |           |           |
| H                | -2.097345 | 3.772836  | 2.522063  |   |           |           |           |
| H                | -2.421502 | 5.108767  | -1.550448 |   |           |           |           |
| H                | -2.612177 | 5.570713  | 0.885898  |   |           |           |           |
| H                | 0.009733  | -3.014015 | 0.842626  |   |           |           |           |
| C                | -2.029492 | -1.861593 | 0.014199  |   |           |           |           |
| C                | -3.211198 | -1.135079 | -0.184640 |   |           |           |           |
| N                | -2.012619 | -3.202891 | 0.049617  |   |           |           |           |
| C                | -4.395908 | -1.834165 | -0.381163 |   |           |           |           |
| Structure int3_b |           |           |           |   |           |           |           |
| C                | -0.450792 | -0.080450 | -0.971422 |   |           |           |           |
| C                | -0.998413 | -1.215562 | -0.506127 |   |           |           |           |
| C                | 1.733198  | -1.027532 | -0.450710 |   |           |           |           |
| C                | 1.006971  | -0.020651 | -1.313455 |   |           |           |           |
| H                | 1.177095  | -0.239507 | -2.378965 |   |           |           |           |
| H                | 1.403445  | 0.982408  | -1.134167 |   |           |           |           |
| N                | 1.178402  | -2.101314 | -0.014216 |   |           |           |           |
| N                | -0.134586 | -2.307076 | -0.303202 |   |           |           |           |
| O                | -1.198975 | 1.047686  | -1.223924 |   |           |           |           |
| C                | -1.050477 | 2.130527  | -0.380820 |   |           |           |           |
| C                | -0.400736 | 2.053120  | 0.849599  |   |           |           |           |
| C                | -1.620788 | 3.326347  | -0.818952 |   |           |           |           |
| C                | -0.320072 | 3.199041  | 1.643754  |   |           |           |           |
| H                | 0.029766  | 1.115271  | 1.186648  |   |           |           |           |
| C                | -1.537326 | 4.456962  | -0.012354 |   |           |           |           |
| H                | -2.120322 | 3.351096  | -1.782016 |   |           |           |           |
| C                | -0.884256 | 4.400722  | 1.221634  |   |           |           |           |
| H                | 0.187952  | 3.142174  | 2.601306  |   |           |           |           |
| H                | -1.982439 | 5.386955  | -0.351543 |   |           |           |           |
| H                | -0.817659 | 5.285353  | 1.845807  |   |           |           |           |
| H                | -0.544154 | -3.044016 | 0.258825  |   |           |           |           |
| C                | -2.415516 | -1.469724 | -0.141981 |   |           |           |           |
| C                | -3.467529 | -0.612421 | -0.493445 |   |           |           |           |
| N                | -2.621926 | -2.605753 | 0.543529  |   |           |           |           |
| C                | -4.757502 | -0.947065 | -0.097010 |   |           |           |           |
| H                | -3.277605 | 0.285149  | -1.065511 |   |           |           |           |
| C                | -3.865783 | -2.915747 | 0.914359  |   |           |           |           |
| C                | -4.969837 | -2.118380 | 0.625274  |   |           |           |           |
| H                | -5.588498 | -0.298879 | -0.355669 |   |           |           |           |
| H                | -3.982456 | -3.844323 | 1.466698  |   |           |           |           |
| H                | -5.960346 | -2.413723 | 0.951691  |   |           |           |           |
| C                | 3.164796  | -0.807772 | -0.126477 |   |           |           |           |
| C                | 3.855797  | -1.656050 | 0.751184  |   |           |           |           |
| N                | 3.749596  | 0.237573  | -0.727453 |   |           |           |           |
| C                | 5.197000  | -1.405453 | 1.001998  |   |           |           |           |
| H                | 3.336027  | -2.484563 | 1.217192  |   |           |           |           |
| C                | 5.042694  | 0.468081  | -0.473918 |   |           |           |           |
| C                | 5.811055  | -0.318780 | 0.378019  |   |           |           |           |
| H                | 5.757063  | -2.044256 | 1.677404  |   |           |           |           |
| H                | 5.482763  | 1.324224  | -0.978783 |   |           |           |           |
| H                | 6.855869  | -0.084146 | 0.546972  |   |           |           |           |
| Structure int3_c |           |           |           |   |           |           |           |
| C                | -0.354287 | 0.047627  | -0.071055 |   |           |           |           |
| C                | -0.713366 | -1.201924 | 0.268386  |   |           |           |           |

|   |           |           |           |
|---|-----------|-----------|-----------|
| C | 1.955119  | -0.605508 | 0.335923  |
| C | 0.998961  | 0.570936  | 0.318296  |
| H | 1.316184  | 1.320017  | -0.414002 |
| H | 0.984932  | 1.064162  | 1.302932  |
| N | 1.580534  | -1.794942 | 0.646518  |
| N | 0.259071  | -2.002978 | 0.885452  |
| O | -1.146930 | 0.834134  | -0.873304 |
| C | -1.513621 | 2.071265  | -0.379927 |
| C | -1.635405 | 2.317898  | 0.986500  |
| C | -1.814465 | 3.055066  | -1.320729 |
| C | -2.052998 | 3.580364  | 1.410559  |
| H | -1.419135 | 1.532268  | 1.704617  |
| C | -2.236937 | 4.306966  | -0.882117 |
| H | -1.712888 | 2.826463  | -2.376529 |
| C | -2.353830 | 4.576718  | 0.483518  |
| H | -2.147726 | 3.777760  | 2.473574  |
| H | -2.471587 | 5.075928  | -1.611165 |
| H | -2.679018 | 5.555201  | 0.820480  |
| H | 0.020066  | -2.987492 | 0.903839  |
| C | -2.019709 | -1.864715 | 0.037154  |
| C | -3.202473 | -1.149352 | -0.192409 |
| N | -1.997111 | -3.204398 | 0.109017  |
| C | -4.382249 | -1.859232 | -0.380622 |
| H | -3.198505 | -0.067296 | -0.214539 |
| C | -3.138702 | -3.873647 | -0.069193 |
| C | -4.357057 | -3.250995 | -0.325295 |
| H | -5.312002 | -1.329575 | -0.560923 |
| H | -3.073448 | -4.956289 | -0.002582 |
| H | -5.255353 | -3.841041 | -0.465779 |
| C | 3.398498  | -0.378095 | 0.059326  |
| C | 3.939378  | 0.907085  | 0.186158  |
| N | 4.146010  | -1.437257 | -0.291693 |
| C | 5.297919  | 1.095928  | -0.053515 |
| H | 3.317535  | 1.743635  | 0.484322  |
| C | 5.444745  | -1.241635 | -0.517234 |
| C | 6.073248  | 0.000734  | -0.415223 |
| H | 5.738910  | 2.082508  | 0.044777  |
| H | 6.017182  | -2.121143 | -0.802077 |
| H | 7.134165  | 0.095930  | -0.616557 |

Structure **int3\_d**

|   |           |           |           |
|---|-----------|-----------|-----------|
| C | -0.369494 | -0.112225 | -0.687628 |
| C | -0.782857 | -1.292953 | -0.210776 |
| C | 1.921613  | -0.843316 | -0.216012 |
| C | 1.077651  | 0.188257  | -0.930947 |
| H | 1.301734  | 0.190693  | -2.008175 |
| H | 1.337969  | 1.189841  | -0.569772 |
| N | 1.485071  | -1.966808 | 0.229995  |
| N | 0.176194  | -2.284748 | 0.066805  |
| O | -1.276700 | 0.821634  | -1.138404 |
| C | -1.390823 | 2.002452  | -0.442429 |
| C | -0.895294 | 2.174628  | 0.849330  |
| C | -2.062931 | 3.037297  | -1.094438 |
| C | -1.074395 | 3.403943  | 1.485727  |
| H | -0.390320 | 1.356508  | 1.353537  |
| C | -2.239992 | 4.254770  | -0.443746 |
| H | -2.437540 | 2.871871  | -2.099426 |
| C | -1.744227 | 4.446772  | 0.848150  |
| H | -0.688265 | 3.539127  | 2.491291  |
| H | -2.764884 | 5.058200  | -0.951004 |
| H | -1.880469 | 5.398260  | 1.351035  |
| H | -0.107864 | -3.015260 | 0.706698  |
| C | -2.197178 | -1.692526 | -0.013970 |

|   |           |           |           |
|---|-----------|-----------|-----------|
| C | -2.617295 | -2.971803 | -0.394459 |
| N | -3.018845 | -0.793286 | 0.546625  |
| C | -3.946670 | -3.327901 | -0.187800 |
| H | -1.919388 | -3.661583 | -0.857719 |
| C | -4.292183 | -1.148399 | 0.731717  |
| C | -4.807028 | -2.397936 | 0.386205  |
| H | -4.302413 | -4.311444 | -0.476743 |
| H | -4.934284 | -0.398628 | 1.186903  |
| H | -5.850981 | -2.627359 | 0.567052  |
| C | 3.369608  | -0.563091 | -0.039907 |
| C | 4.207092  | -1.434653 | 0.671715  |
| N | 3.818577  | 0.565357  | -0.606130 |
| C | 5.551342  | -1.115058 | 0.793344  |
| H | 3.795244  | -2.334819 | 1.111815  |
| C | 5.117529  | 0.860307  | -0.480213 |
| C | 6.024330  | 0.059181  | 0.205748  |
| H | 6.223114  | -1.769560 | 1.339443  |
| H | 5.445409  | 1.782675  | -0.952704 |
| H | 7.066775  | 0.348324  | 0.276259  |

Structure **int3\_e**

|   |           |           |           |
|---|-----------|-----------|-----------|
| C | -0.312834 | 0.006572  | -0.345292 |
| C | -0.669048 | -1.226967 | 0.037143  |
| C | 1.999981  | -0.623598 | 0.150009  |
| C | 1.070058  | 0.539619  | -0.109294 |
| H | 1.412159  | 1.101267  | -0.984992 |
| H | 1.102922  | 1.245349  | 0.734494  |
| N | 1.619411  | -1.797225 | 0.510447  |
| N | 0.293762  | -2.045305 | 0.655820  |
| O | -1.202452 | 0.833303  | -0.994667 |
| C | -1.558226 | 1.999288  | -0.349526 |
| C | -1.550883 | 2.117295  | 1.039920  |
| C | -1.983350 | 3.054360  | -1.156725 |
| C | -1.965429 | 3.316801  | 1.620292  |
| H | -1.234513 | 1.281032  | 1.656265  |
| C | -2.401602 | 4.241999  | -0.562792 |
| H | -1.979958 | 2.928911  | -2.234590 |
| C | -2.391241 | 4.381071  | 0.827039  |
| H | -1.958030 | 3.412213  | 2.701553  |
| H | -2.732918 | 5.063699  | -1.189879 |
| H | -2.713205 | 5.309849  | 1.285832  |
| H | 0.101447  | -3.038741 | 0.656322  |
| C | -2.030326 | -1.809637 | -0.062744 |
| C | -2.588374 | -2.437570 | 1.056790  |
| N | -2.664902 | -1.721259 | -1.239806 |
| C | -3.861721 | -2.987772 | 0.949716  |
| H | -2.037448 | -2.475478 | 1.991003  |
| C | -3.889133 | -2.248849 | -1.324048 |
| C | -4.531396 | -2.890962 | -0.265954 |
| H | -4.322531 | -3.476162 | 1.802075  |
| H | -4.379941 | -2.160840 | -2.289896 |
| H | -5.525450 | -3.302224 | -0.399815 |
| C | 3.462009  | -0.397234 | 0.017648  |
| C | 4.383872  | -1.445577 | 0.153977  |
| N | 3.838187  | 0.864832  | -0.229931 |
| C | 5.736277  | -1.163660 | 0.028872  |
| H | 4.029156  | -2.449985 | 0.351343  |
| C | 5.145831  | 1.121146  | -0.349359 |
| C | 6.133504  | 0.149057  | -0.229088 |
| H | 6.472636  | -1.954796 | 0.128002  |
| H | 5.413063  | 2.155478  | -0.550037 |
| H | 7.179215  | 0.414424  | -0.335549 |

Structure **int3\_f**

|   |           |           |           |
|---|-----------|-----------|-----------|
| C | -0.395953 | -0.120823 | -0.730925 |
| C | -0.834639 | -1.290014 | -0.249817 |
| C | 1.881213  | -0.899626 | -0.253250 |
| C | 1.055421  | 0.118032  | -1.015463 |
| H | 1.250037  | 0.053904  | -2.097584 |
| H | 1.334239  | 1.134308  | -0.708991 |
| N | 1.418336  | -2.011958 | 0.192606  |
| N | 0.105687  | -2.305652 | 0.004930  |
| O | -1.275127 | 0.852384  | -1.149674 |
| C | -1.320239 | 2.031643  | -0.441635 |
| C | -0.776691 | 2.173500  | 0.834274  |
| C | -1.969826 | 3.097694  | -1.065387 |
| C | -0.884346 | 3.404475  | 1.483661  |
| H | -0.290325 | 1.331587  | 1.317350  |
| C | -2.075365 | 4.316541  | -0.401831 |
| H | -2.382843 | 2.955083  | -2.058731 |
| C | -1.530631 | 4.478447  | 0.874364  |
| H | -0.460862 | 3.516224  | 2.476947  |
| H | -2.582673 | 5.144597  | -0.886852 |
| H | -1.611199 | 5.431035  | 1.387050  |
| H | -0.195540 | -3.038983 | 0.633926  |
| C | -2.254729 | -1.649516 | -0.020611 |
| C | -2.719039 | -2.915826 | -0.392841 |
| N | -3.037896 | -0.727976 | 0.558176  |
| C | -4.052868 | -3.234697 | -0.156084 |
| H | -2.051979 | -3.624460 | -0.872910 |
| C | -4.316192 | -1.047304 | 0.771985  |
| C | -4.873450 | -2.281689 | 0.437947  |
| H | -4.442512 | -4.207516 | -0.437429 |
| H | -4.926498 | -0.280158 | 1.241685  |
| H | -5.919016 | -2.482118 | 0.642397  |
| C | 3.329722  | -0.624398 | -0.047078 |
| C | 3.967526  | 0.361265  | -0.809785 |
| N | 3.985259  | -1.349615 | 0.874273  |
| C | 5.326599  | 0.595206  | -0.613561 |
| H | 3.421677  | 0.928974  | -1.554418 |
| C | 5.283882  | -1.114307 | -1.051988 |
| C | 6.005648  | -0.155167 | 0.337964  |
| H | 5.841032  | 1.350983  | -1.198095 |
| H | 5.779286  | -1.718058 | 1.808634  |
| H | 7.062231  | -0.008690 | 0.531040  |

Structure **int3\_g**

|   |           |           |           |
|---|-----------|-----------|-----------|
| C | -0.395953 | -0.120823 | -0.730925 |
| C | -0.834639 | -1.290014 | -0.249817 |
| C | 1.881213  | -0.899626 | -0.253250 |
| C | 1.055421  | 0.118032  | -1.015463 |
| H | 1.250037  | 0.053904  | -2.097584 |
| H | 1.334239  | 1.134308  | -0.708991 |
| N | 1.418336  | -2.011958 | 0.192606  |
| N | 0.105687  | -2.305652 | 0.004930  |
| O | -1.275127 | 0.852384  | -1.149674 |
| C | -1.320239 | 2.031643  | -0.441635 |
| C | -0.776691 | 2.173500  | 0.834274  |
| C | -1.969826 | 3.097694  | -1.065387 |
| C | -0.884346 | 3.404475  | 1.483661  |
| H | -0.290325 | 1.331587  | 1.317350  |
| C | -2.075365 | 4.316541  | -0.401831 |
| H | -2.382843 | 2.955083  | -2.058731 |
| C | -1.530631 | 4.478447  | 0.874364  |
| H | -0.460862 | 3.516224  | 2.476947  |
| H | -2.582673 | 5.144597  | -0.886852 |

|   |           |           |           |
|---|-----------|-----------|-----------|
| H | -1.611199 | 5.431035  | 1.387050  |
| H | -0.195540 | -3.038983 | 0.633926  |
| C | -2.254729 | -1.649516 | -0.020611 |
| C | -2.719039 | -2.915826 | -0.392841 |
| N | -3.037896 | -0.727976 | 0.558176  |
| C | -4.052868 | -3.234697 | -0.156084 |
| H | -2.051979 | -3.624460 | -0.872910 |
| C | -4.316192 | -1.047304 | 0.771985  |
| C | -4.873450 | -2.281689 | 0.437947  |
| H | -4.442512 | -4.207516 | -0.437429 |
| H | -4.926498 | -0.280158 | 1.241685  |
| H | -5.919016 | -2.482118 | 0.642397  |
| C | 3.329722  | -0.624398 | -0.047078 |
| C | 3.967526  | 0.361265  | -0.809785 |
| N | 3.985259  | -1.349615 | 0.874273  |
| C | 5.326599  | 0.595206  | -0.613561 |
| H | 3.421677  | 0.928974  | -1.554418 |
| C | 5.283882  | -1.114307 | -1.051988 |
| C | 6.005648  | -0.155167 | 0.337964  |
| H | 5.841032  | 1.350983  | -1.198095 |
| H | 5.779286  | -1.718058 | 1.808634  |
| H | 7.062231  | -0.008690 | 0.531040  |

Structure **int3\_h**

|   |           |           |           |
|---|-----------|-----------|-----------|
| C | -0.304397 | 0.011290  | -0.335160 |
| C | -0.651311 | -1.217929 | 0.067173  |
| C | 2.016259  | -0.593621 | 0.176479  |
| C | 1.068486  | 0.561277  | -0.078610 |
| H | 1.394240  | 1.135008  | -0.954768 |
| H | 1.072175  | 1.259739  | 0.773160  |
| N | 1.640121  | -1.760908 | 0.559610  |
| N | 0.315173  | -2.008121 | 0.712932  |
| O | -1.189045 | 0.819188  | -1.012784 |
| C | -1.587516 | 1.978813  | -0.380167 |
| C | -1.609331 | 2.104354  | 1.008402  |
| C | -2.024159 | 3.018062  | -1.201626 |
| C | -2.066126 | 3.295835  | 1.573691  |
| H | -1.284197 | 1.280038  | 1.636148  |
| C | -2.484586 | 4.197365  | -0.622696 |
| H | -1.997333 | 2.886708  | -2.278439 |
| C | -2.504400 | 4.344147  | 0.766308  |
| H | -2.081937 | 3.397053  | 2.654319  |
| H | -2.825428 | 5.006637  | -1.260722 |
| H | -2.859533 | 5.266496  | 1.213407  |
| H | 0.127392  | -3.001807 | 0.747379  |
| C | -2.003194 | -1.820176 | -0.041328 |
| C | -2.569699 | -2.433910 | 1.081674  |
| N | -2.620326 | -1.762390 | -1.229377 |
| C | -3.833447 | -3.004116 | 0.965532  |
| H | -2.033287 | -2.445913 | 2.025013  |
| C | -3.835734 | -2.308632 | -1.322198 |
| C | -4.485166 | -2.939937 | -0.261936 |
| H | -4.300656 | -3.482861 | 1.819867  |
| H | -4.312758 | -2.245535 | -2.296821 |
| H | -5.471053 | -3.368045 | -0.403160 |
| C | 3.478509  | -0.358512 | 0.025799  |
| C | 3.973498  | 0.949963  | -0.031042 |
| N | 4.285667  | -1.430524 | -0.040244 |
| C | 5.346402  | 1.149530  | -0.155864 |
| H | 3.306055  | 1.801373  | 0.034877  |
| C | 5.595881  | -1.224361 | -0.159777 |
| C | 6.181835  | 0.041806  | -0.223568 |
| H | 5.750843  | 2.155641  | -0.196918 |

|                         |           |           |           |
|-------------------------|-----------|-----------|-----------|
| H                       | 6.216266  | -2.115826 | -0.213432 |
| H                       | 7.256310  | 0.143909  | -0.324597 |
| Structure <b>int4_a</b> |           |           |           |
| C                       | -0.751296 | -0.421060 | 1.367783  |
| C                       | -1.362600 | -0.757335 | 0.035537  |
| C                       | 1.350349  | -0.853769 | 0.195902  |
| C                       | 0.680463  | -0.816841 | 1.368099  |
| H                       | 1.187539  | -0.991258 | 2.309040  |
| N                       | 0.653916  | -0.734054 | -0.985625 |
| N                       | -0.677218 | -0.837424 | -1.059473 |
| O                       | -0.931591 | 1.011576  | 1.661697  |
| C                       | -0.368384 | 1.892527  | 0.766008  |
| C                       | 0.939960  | 2.343859  | 0.956736  |
| C                       | -1.125569 | 2.362048  | -0.309574 |
| C                       | 1.494554  | 3.252751  | 0.056519  |
| H                       | 1.506831  | 1.978901  | 1.807463  |
| C                       | -0.564411 | 3.271714  | -1.205149 |
| H                       | -2.146251 | 2.010761  | -0.431544 |
| C                       | 0.747367  | 3.714325  | -1.028628 |
| H                       | 2.511812  | 3.601892  | 0.204858  |
| H                       | -1.154543 | 3.635941  | -2.040415 |
| H                       | 1.182273  | 4.421457  | -1.727648 |
| H                       | -1.316028 | -0.885136 | 2.173905  |
| H                       | 1.154326  | -0.907868 | -1.848183 |
| C                       | -2.835910 | -0.914845 | -0.075415 |
| C                       | -3.463194 | -1.044394 | -1.323354 |
| N                       | -3.521331 | -0.920341 | 1.076258  |
| C                       | -4.843069 | -1.186640 | -1.365511 |
| H                       | -2.867370 | -1.030467 | -2.228019 |
| C                       | -4.849293 | -1.064014 | 1.020212  |
| C                       | -5.559517 | -1.199456 | -0.168903 |
| H                       | -5.354376 | -1.285902 | -2.317738 |
| H                       | -5.369345 | -1.067549 | 1.974783  |
| H                       | -6.637995 | -1.308301 | -0.153990 |
| C                       | 2.815255  | -1.046020 | 0.037241  |
| C                       | 3.695668  | -0.856283 | 1.105984  |
| N                       | 3.230247  | -1.382233 | -1.191601 |
| C                       | 5.053898  | -1.060797 | 0.890474  |
| H                       | 3.329063  | -0.543256 | 2.076858  |
| C                       | 4.538030  | -1.564887 | -1.389348 |
| C                       | 5.489223  | -1.426302 | -0.380962 |
| H                       | 5.762336  | -0.925462 | 1.700968  |
| H                       | 4.836941  | -1.834705 | -2.398461 |
| H                       | 6.539101  | -1.590776 | -0.594281 |

Structure **int4\_b**

|   |           |           |           |
|---|-----------|-----------|-----------|
| C | 0.544209  | 0.035912  | -0.437931 |
| C | 0.860381  | -1.347425 | 0.059979  |
| C | -1.764879 | -0.653962 | -0.033625 |
| C | -0.914459 | 0.130572  | -0.730474 |
| H | -1.284957 | 0.844700  | -1.454925 |
| N | -1.261003 | -1.646000 | 0.777833  |
| N | 0.001561  | -2.083700 | 0.684605  |
| O | 0.939482  | 0.921068  | 0.643779  |
| C | 1.127742  | 2.243979  | 0.374297  |
| C | 0.928774  | 2.839354  | -0.875451 |
| C | 1.555678  | 3.025356  | 1.456463  |
| C | 1.166688  | 4.208467  | -1.028768 |
| H | 0.590401  | 2.264835  | -1.729224 |
| C | 1.786103  | 4.385008  | 1.287984  |
| H | 1.703621  | 2.543785  | 2.417823  |
| C | 1.593773  | 4.988548  | 0.041494  |
| H | 1.009069  | 4.660776  | -2.003131 |

|   |           |           |           |
|---|-----------|-----------|-----------|
| H | 2.119373  | 4.977067  | 2.134833  |
| H | 1.773435  | 6.050286  | -0.089183 |
| H | 1.169993  | 0.264766  | -1.302479 |
| H | -1.919946 | -2.306856 | 1.170433  |
| C | 2.239426  | -1.875717 | -0.093394 |
| C | 2.579270  | -3.166247 | 0.336764  |
| N | 3.127860  | -1.050182 | -0.663991 |
| C | 3.886796  | -3.601074 | 0.171348  |
| H | 1.823953  | -3.800145 | 0.785459  |
| C | 4.381956  | -1.485074 | -0.822171 |
| C | 4.815203  | -2.745586 | -0.421687 |
| H | 4.178693  | -4.594713 | 0.496023  |
| H | 5.073064  | -0.788735 | -1.290225 |
| H | 5.846340  | -3.044130 | -0.572643 |
| C | -3.249858 | -0.590031 | -0.087857 |
| C | -3.916259 | 0.513954  | -0.626840 |
| N | -3.896573 | -1.644123 | 0.427186  |
| C | -5.305989 | 0.499442  | -0.657534 |
| H | -3.363765 | 1.368721  | -0.999111 |
| C | -5.231598 | -1.641829 | 0.403166  |
| C | -5.983054 | -0.600100 | -0.135500 |
| H | -5.851803 | 1.339920  | -1.073190 |
| H | -5.719901 | -2.512110 | 0.832775  |
| H | -7.065767 | -0.649935 | -0.134477 |

Structure **int4\_c**

|   |           |           |           |
|---|-----------|-----------|-----------|
| C | -0.745460 | -0.330797 | 1.382026  |
| C | -1.358288 | -0.761010 | 0.074539  |
| C | 1.356081  | -0.842317 | 0.245470  |
| C | 0.685208  | -0.725086 | 1.411891  |
| H | 1.189635  | -0.830159 | 2.364257  |
| N | 0.659820  | -0.808035 | -0.939867 |
| N | -0.670886 | -0.914717 | -1.011540 |
| O | -0.927326 | 1.116247  | 1.597764  |
| C | -0.373794 | 1.946046  | 0.647474  |
| C | 0.934969  | 2.409264  | 0.801264  |
| C | -1.141879 | 2.349239  | -0.446561 |
| C | 1.479125  | 3.265701  | -0.154945 |
| H | 1.509637  | 2.095148  | 1.666872  |
| C | -0.590937 | 3.207173  | -1.397776 |
| H | -2.162782 | 1.989344  | -0.538301 |
| C | 0.721086  | 3.661950  | -1.258209 |
| H | 2.496672  | 3.625045  | -0.036201 |
| H | -1.188877 | 3.521060  | -2.247706 |
| H | 1.148001  | 4.328505  | -2.000645 |
| H | -1.298041 | -0.748385 | 2.225638  |
| H | 1.162869  | -1.024603 | -1.791149 |
| C | -2.832179 | -0.933708 | -0.017726 |
| C | -3.670367 | -0.311591 | 0.917330  |
| N | -3.311674 | -1.694779 | -1.014776 |
| C | -5.046768 | -0.491377 | 0.813178  |
| H | -3.251264 | 0.320542  | 1.692369  |
| C | -4.632520 | -1.851244 | -1.105518 |
| C | -5.545459 | -1.277994 | -0.219204 |
| H | -5.715680 | -0.017295 | 1.524184  |
| H | -4.983883 | -2.474928 | -1.924034 |
| H | -6.608957 | -1.448546 | -0.342165 |
| C | 2.822083  | -1.039419 | 0.102154  |
| C | 3.699627  | -0.783443 | 1.159271  |
| N | 3.240425  | -1.446429 | -1.103812 |
| C | 5.059061  | -0.994757 | 0.958302  |
| H | 3.330444  | -0.414990 | 2.109482  |
| C | 4.549239  | -1.634932 | -1.288518 |

|                         |           |           |           |                         |           |           |           |
|-------------------------|-----------|-----------|-----------|-------------------------|-----------|-----------|-----------|
| C                       | 5.498107  | -1.432735 | -0.288702 | H                       | 2.148019  | 2.050931  | 0.089993  |
| H                       | 5.765390  | -0.808986 | 1.760588  | C                       | -0.768653 | 3.757753  | 0.549415  |
| H                       | 4.851002  | -1.962767 | -2.279427 | H                       | -2.573318 | 3.425230  | -0.582122 |
| H                       | 6.549043  | -1.605031 | -0.490347 | H                       | 1.171091  | 3.873226  | 1.482767  |
| Structure <b>int4_d</b> |           |           |           | H                       | -1.197761 | 4.549132  | 1.155563  |
| C                       | 0.539901  | 0.026997  | -0.439646 | H                       | 1.303331  | -1.224393 | -2.001363 |
| C                       | 0.860394  | -1.355045 | 0.067011  | H                       | -1.063055 | -0.689518 | 2.043911  |
| C                       | -1.767544 | -0.657759 | -0.022446 | C                       | 2.858767  | -0.873165 | 0.197558  |
| C                       | -0.919400 | 0.126953  | -0.721665 | C                       | 3.507863  | -0.799987 | 1.438568  |
| H                       | -1.290633 | 0.844265  | -1.442156 | N                       | 3.525303  | -1.038572 | -0.953146 |
| N                       | -1.261457 | -1.650379 | 0.783971  | C                       | 4.891195  | -0.906474 | 1.475344  |
| N                       | 0.001343  | -2.087633 | 0.695225  | H                       | 2.926558  | -0.660766 | 2.342066  |
| O                       | 0.959687  | 0.926956  | 0.621051  | C                       | 4.856911  | -1.145320 | -0.901521 |
| C                       | 1.130790  | 2.251333  | 0.336049  | C                       | 5.588564  | -1.085153 | 0.280824  |
| C                       | 0.911955  | 2.831580  | -0.917018 | H                       | 5.419664  | -0.850233 | 2.421660  |
| C                       | 1.569104  | 3.044257  | 1.405042  | H                       | 5.361817  | -1.282109 | -1.854400 |
| C                       | 1.139053  | 4.200845  | -1.086487 | H                       | 6.668895  | -1.172894 | 0.261961  |
| H                       | 0.565485  | 2.247515  | -1.761029 | C                       | -2.806064 | -1.048034 | 0.148109  |
| C                       | 1.788460  | 4.403546  | 1.220382  | C                       | -3.500245 | -0.263853 | 1.074800  |
| H                       | 1.732982  | 2.572300  | 2.368538  | N                       | -3.415640 | -1.916079 | -0.670825 |
| C                       | 1.575260  | 4.993314  | -0.029350 | C                       | -4.882702 | -0.403749 | 1.163517  |
| H                       | 0.965530  | 4.642761  | -2.062820 | H                       | -2.979337 | 0.461415  | 1.691766  |
| H                       | 2.129357  | 5.006012  | 2.056708  | C                       | -4.741054 | -2.035406 | -0.577165 |
| H                       | 1.746093  | 6.054873  | -0.172525 | C                       | -5.520746 | -1.310484 | 0.324652  |
| H                       | 1.142994  | 0.250059  | -1.325733 | H                       | -5.448625 | 0.193805  | 1.870473  |
| H                       | -1.919123 | -2.305803 | 1.187588  | H                       | -5.204942 | -2.748395 | -1.253694 |
| C                       | 2.244740  | -1.877358 | -0.079681 | H                       | -6.594538 | -1.454710 | 0.357301  |
| C                       | 3.309036  | -0.994599 | -0.305726 | Structure <b>int4_f</b> |           |           |           |
| N                       | 2.423165  | -3.204633 | 0.012794  | C                       | 0.489128  | 0.005852  | -0.427815 |
| C                       | 4.594682  | -1.509621 | -0.443319 | C                       | 0.826129  | -1.386427 | 0.030798  |
| H                       | 3.140222  | 0.075873  | -0.347936 | C                       | -1.815339 | -0.733190 | -0.033036 |
| C                       | 3.661283  | -3.682438 | -0.113539 | C                       | -0.978221 | 0.113943  | -0.663302 |
| C                       | 4.781716  | -2.883898 | -0.346502 | H                       | -1.392416 | 0.911491  | -1.267450 |
| H                       | 5.434483  | -0.844496 | -0.616206 | N                       | -1.302117 | -1.787838 | 0.700748  |
| H                       | 3.766591  | -4.761663 | -0.033555 | N                       | -0.021794 | -2.177787 | 0.597010  |
| H                       | 5.763125  | -3.333111 | -0.447303 | O                       | 0.920137  | 0.873525  | 0.653736  |
| C                       | -3.252766 | -0.590400 | -0.069971 | C                       | 1.160409  | 2.188362  | 0.385320  |
| C                       | -3.919617 | 0.512594  | -0.610028 | C                       | 0.936939  | 2.802594  | -0.851018 |
| N                       | -3.898557 | -1.641020 | 0.453006  | C                       | 1.665010  | 2.940781  | 1.454765  |
| C                       | -5.309605 | 0.500995  | -0.632397 | C                       | 1.228327  | 4.161178  | -1.004599 |
| H                       | -3.367834 | 1.364561  | -0.989671 | H                       | 0.536725  | 2.251007  | -1.693202 |
| C                       | -5.233598 | -1.636139 | 0.436615  | C                       | 1.946893  | 4.290814  | 1.286560  |
| C                       | -5.985901 | -0.594824 | -0.101808 | H                       | 1.830420  | 2.444910  | 2.405953  |
| H                       | -5.856013 | 1.340857  | -1.048466 | C                       | 1.731780  | 4.912678  | 0.052928  |
| H                       | -5.721193 | -2.503722 | 0.872397  | H                       | 1.051021  | 4.628470  | -1.968443 |
| H                       | -7.068689 | -0.642273 | -0.094289 | H                       | 2.338888  | 4.860769  | 2.123379  |
| Structure <b>int4_e</b> |           |           |           | H                       | 1.952237  | 5.966725  | -0.077554 |
| C                       | 0.742146  | -0.651121 | -1.265896 | H                       | 1.087340  | 0.251964  | -1.307592 |
| C                       | 1.380316  | -0.763129 | 0.090890  | H                       | -1.915917 | -2.533953 | 0.996355  |
| C                       | -1.334213 | -0.917267 | -0.003343 | C                       | 2.225021  | -1.868129 | -0.107806 |
| C                       | -0.683851 | -1.055777 | -1.175912 | C                       | 2.608991  | -3.138491 | 0.344167  |
| H                       | -1.235449 | -1.329954 | -2.066762 | N                       | 3.085444  | -1.020658 | -0.688723 |
| N                       | -0.621499 | -0.600632 | 1.139038  | C                       | 3.930861  | -3.530530 | 0.185982  |
| N                       | 0.715864  | -0.680513 | 1.197143  | H                       | 1.876497  | -3.790164 | 0.804944  |
| O                       | 0.886822  | 0.723170  | -1.778102 | C                       | 4.354096  | -1.414146 | -0.839204 |
| C                       | 0.331772  | 1.718428  | -1.004551 | C                       | 4.829898  | -2.652850 | -0.419594 |
| C                       | -0.994591 | 2.107964  | -1.207143 | H                       | 4.256805  | -4.507663 | 0.527885  |
| C                       | 1.114284  | 2.358286  | -0.040958 | H                       | 5.021555  | -0.701169 | -1.316376 |
| C                       | -1.541476 | 3.125497  | -0.426190 | H                       | 5.871176  | -2.917434 | -0.564090 |
| H                       | -1.581847 | 1.609469  | -1.971630 | C                       | -3.296941 | -0.609508 | -0.068794 |
| C                       | 0.561232  | 3.376818  | 0.734314  | C                       | -4.085119 | -1.063670 | 0.993009  |
|                         |           |           |           | N                       | -3.814973 | -0.020141 | -1.155133 |

|   |           |           |           |
|---|-----------|-----------|-----------|
| C | -5.466831 | -0.912575 | 0.911039  |
| H | -3.634905 | -1.497530 | 1.879661  |
| C | -5.139469 | 0.122690  | -1.217235 |
| C | -6.011101 | -0.310956 | -0.217790 |
| H | -6.102459 | -1.252740 | 1.721810  |
| H | -5.526221 | 0.603804  | -2.111744 |
| H | -7.080522 | -0.172255 | -0.326999 |

Structure **int4\_g**

|   |           |           |           |
|---|-----------|-----------|-----------|
| C | -0.736771 | -0.551163 | 1.303260  |
| C | -1.377220 | -0.766576 | -0.043077 |
| C | 1.338483  | -0.909904 | 0.067070  |
| C | 0.686914  | -0.965021 | 1.246087  |
| H | 1.234715  | -1.175817 | 2.156114  |
| N | 0.626303  | -0.675488 | -1.093071 |
| N | -0.710525 | -0.759535 | -1.151191 |
| O | -0.880039 | 0.853475  | 1.728649  |
| C | -0.333676 | 1.796188  | 0.884450  |
| C | 0.994891  | 2.196467  | 1.045942  |
| C | -1.127427 | 2.368580  | -0.111297 |
| C | 1.533071  | 3.157424  | 0.190849  |
| H | 1.590408  | 1.751208  | 1.836393  |
| C | -0.582835 | 3.331171  | -0.960433 |
| H | -2.162651 | 2.054063  | -0.208982 |
| C | 0.749274  | 3.721906  | -0.817050 |
| H | 2.566727  | 3.465944  | 0.313915  |
| H | -1.200806 | 3.775507  | -1.734438 |
| H | 1.171854  | 4.469072  | -1.481079 |
| H | -1.286359 | -1.077017 | 2.086130  |
| H | 1.071907  | -0.809025 | -1.990426 |
| C | -2.856011 | -0.897521 | -0.135644 |
| C | -3.666657 | -0.414888 | 0.900219  |
| N | -3.365325 | -1.483066 | -1.231395 |
| C | -5.047986 | -0.550762 | 0.793756  |
| H | -3.223120 | 0.080011  | 1.757116  |
| C | -4.690278 | -1.599654 | -1.321638 |
| C | -5.577819 | -1.156152 | -0.340109 |
| H | -5.696140 | -0.181888 | 1.582101  |
| H | -5.066698 | -2.080130 | -2.221505 |
| H | -6.646345 | -1.285508 | -0.469467 |
| C | 2.810320  | -1.052850 | -0.073067 |
| C | 3.506786  | -0.332651 | -1.048676 |
| N | 3.416891  | -1.865956 | 0.802194  |
| C | 4.888938  | -0.481324 | -1.126765 |
| H | 2.988100  | 0.351911  | -1.712230 |
| C | 4.742144  | -1.994363 | 0.717772  |
| C | 5.524054  | -1.332490 | -0.229361 |
| H | 5.456866  | 0.067020  | -1.871029 |
| H | 5.203773  | -2.662173 | 1.440329  |
| H | 6.597502  | -1.481158 | -0.251621 |

Structure **int4\_h**

|   |           |           |           |
|---|-----------|-----------|-----------|
| C | 0.492754  | 0.001543  | -0.422131 |
| C | 0.842261  | -1.383531 | 0.057136  |
| C | -1.804623 | -0.741319 | -0.011176 |
| C | -0.973833 | 0.098322  | -0.659667 |
| H | -1.391640 | 0.880013  | -1.281239 |
| N | -1.282263 | -1.776016 | 0.740727  |
| N | -0.001329 | -2.164737 | 0.643530  |
| O | 0.928881  | 0.895446  | 0.636831  |
| C | 1.139482  | 2.213099  | 0.345706  |
| C | 0.893648  | 2.802647  | -0.897877 |
| C | 1.645111  | 2.987955  | 1.397991  |

|   |           |           |           |
|---|-----------|-----------|-----------|
| C | 1.162195  | 4.163253  | -1.075313 |
| H | 0.492483  | 2.232683  | -1.727247 |
| C | 1.903802  | 4.339346  | 1.205952  |
| H | 1.828815  | 2.508763  | 2.354314  |
| C | 1.665207  | 4.938087  | -0.034836 |
| H | 0.967216  | 4.612822  | -2.044054 |
| H | 2.296205  | 4.928305  | 2.029216  |
| H | 1.867546  | 5.993275  | -0.183897 |
| H | 1.073385  | 0.242019  | -1.319352 |
| H | -1.891525 | -2.513084 | 1.066661  |
| C | 2.244351  | -1.862004 | -0.084024 |
| C | 3.282871  | -0.947788 | -0.304323 |
| N | 2.461972  | -3.183895 | 0.002163  |
| C | 4.583288  | -1.424809 | -0.442788 |
| H | 3.084720  | 0.117586  | -0.342590 |
| C | 3.713223  | -3.625011 | -0.124794 |
| C | 4.810525  | -2.793128 | -0.352043 |
| H | 5.403209  | -0.734357 | -0.611708 |
| H | 3.849520  | -4.701137 | -0.049743 |
| H | 5.804839  | -3.212933 | -0.453128 |
| C | -3.287052 | -0.627460 | -0.048781 |
| C | -4.072613 | -1.070448 | 1.019454  |
| N | -3.807936 | -0.057793 | -1.144126 |
| C | -5.455284 | -0.929809 | 0.934284  |
| H | -3.620745 | -1.487498 | 1.913275  |
| C | -5.133255 | 0.075078  | -1.209411 |
| C | -6.002652 | -0.349301 | -0.203980 |
| H | -6.089160 | -1.261776 | 1.749791  |
| H | -5.522550 | 0.540076  | -2.111288 |
| H | -7.072905 | -0.219564 | -0.315997 |

Structure **TS3\_a**

|   |           |           |           |
|---|-----------|-----------|-----------|
| C | -0.893653 | -1.109524 | 1.129795  |
| C | -1.504439 | -0.795998 | -0.129271 |
| C | 1.198099  | -1.010097 | -0.012235 |
| C | 0.483520  | -1.354693 | 1.119715  |
| H | 0.989191  | -1.712291 | 2.006593  |
| N | 0.516055  | -0.625189 | -1.107402 |
| N | -0.801366 | -0.536674 | -1.204239 |
| O | -1.046567 | 0.820098  | 1.965659  |
| C | -0.259847 | 1.572790  | 1.242056  |
| C | 1.138988  | 1.637535  | 1.488514  |
| C | -0.749991 | 2.283112  | 0.111466  |
| C | 1.993544  | 2.317592  | 0.624464  |
| H | 1.529234  | 1.121682  | 2.362654  |
| C | 0.111881  | 2.960154  | -0.741681 |
| H | -1.820132 | 2.258238  | -0.081650 |
| C | 1.493253  | 2.966289  | -0.507356 |
| H | 3.062205  | 2.327588  | 0.826734  |
| H | -0.290148 | 3.479909  | -1.607752 |
| H | 2.163316  | 3.486198  | -1.184826 |
| H | -1.522910 | -1.450142 | 1.938164  |
| H | 1.047941  | -0.395562 | -1.943777 |
| C | -2.981552 | -0.682726 | -0.249725 |
| C | -3.569486 | -0.062413 | -1.356682 |
| N | -3.692968 | -1.198751 | 0.759914  |
| C | -4.956128 | 0.017314  | -1.411852 |
| H | -2.945888 | 0.348302  | -2.142022 |
| C | -5.023931 | -1.117490 | 0.692499  |
| C | -5.704270 | -0.521212 | -0.367786 |
| H | -5.444360 | 0.495916  | -2.254440 |
| H | -5.572619 | -1.548503 | 1.525649  |
| H | -6.787553 | -0.480964 | -0.367690 |

|   |          |           |           |
|---|----------|-----------|-----------|
| C | 2.674766 | -1.024332 | -0.158334 |
| C | 3.518677 | -1.276160 | 0.923039  |
| N | 3.124431 | -0.740635 | -1.387381 |
| C | 4.893019 | -1.236722 | 0.706178  |
| H | 3.123507 | -1.484918 | 1.910044  |
| C | 4.442088 | -0.702401 | -1.583298 |
| C | 5.368088 | -0.944744 | -0.568373 |
| H | 5.579640 | -1.426008 | 1.524171  |
| H | 4.771988 | -0.468580 | -2.591289 |
| H | 6.430308 | -0.900568 | -0.778875 |

Structure **TS3\_b**

|   |           |           |           |
|---|-----------|-----------|-----------|
| C | -0.891523 | -0.700653 | 1.401834  |
| C | -1.512679 | -0.784081 | 0.110660  |
| C | 1.191889  | -0.965066 | 0.272853  |
| C | 0.484143  | -0.948523 | 1.458948  |
| H | 0.991668  | -1.032120 | 2.410476  |
| N | 0.501540  | -0.925822 | -0.882856 |
| N | -0.815418 | -0.867058 | -0.996908 |
| O | -0.998458 | 1.386806  | 1.690010  |
| C | -0.225302 | 1.890518  | 0.762748  |
| C | 1.177614  | 2.015125  | 0.953322  |
| C | -0.737730 | 2.238675  | -0.517046 |
| C | 2.015522  | 2.407485  | -0.087569 |
| H | 1.584593  | 1.774867  | 1.932733  |
| C | 0.107681  | 2.630166  | -1.547265 |
| H | -1.811474 | 2.163531  | -0.673902 |
| C | 1.493068  | 2.698511  | -1.350184 |
| H | 3.087879  | 2.469927  | 0.082967  |
| H | -0.310688 | 2.873554  | -2.520624 |
| H | 2.149657  | 2.993423  | -2.162672 |
| H | -1.501607 | -0.795933 | 2.289706  |
| H | 1.028817  | -0.956028 | -1.752777 |
| C | -2.993217 | -0.728593 | -0.030881 |
| C | -3.748371 | 0.017665  | 0.878639  |
| N | -3.536123 | -1.411220 | -1.048081 |
| C | -5.131423 | 0.049264  | 0.722574  |
| H | -3.245616 | 0.585033  | 1.654422  |
| C | -4.862575 | -1.368680 | -1.184765 |
| C | -5.704966 | -0.658880 | -0.328130 |
| H | -5.747207 | 0.624125  | 1.406519  |
| H | -5.275859 | -1.933973 | -2.016089 |
| H | -6.777071 | -0.665424 | -0.489069 |
| C | 2.667285  | -1.031366 | 0.130130  |
| C | 3.517019  | -0.950896 | 1.232978  |
| N | 3.109526  | -1.133754 | -1.129575 |
| C | 4.889930  | -0.990382 | 1.007701  |
| H | 3.127493  | -0.848531 | 2.238836  |
| C | 4.426074  | -1.166088 | -1.334378 |
| C | 5.357617  | -1.099784 | -0.297997 |
| H | 5.581235  | -0.930072 | 1.841267  |
| H | 4.750300  | -1.248332 | -2.367638 |
| H | 6.418545  | -1.130013 | -0.517331 |

Structure **TS3\_c**

|   |           |           |           |
|---|-----------|-----------|-----------|
| C | 0.839238  | -1.192629 | -1.000579 |
| C | 1.483234  | -0.786351 | 0.214221  |
| C | -1.225943 | -0.946880 | 0.172036  |
| C | -0.543009 | -1.389331 | -0.945564 |
| H | -1.106247 | -1.782079 | -1.781689 |
| N | -0.512313 | -0.494805 | 1.223098  |
| N | 0.812261  | -0.423741 | 1.278700  |
| O | 1.052612  | 0.670757  | -1.994713 |

|   |           |           |           |
|---|-----------|-----------|-----------|
| C | 0.298500  | 1.504189  | -1.329691 |
| C | -1.097889 | 1.605458  | -1.580217 |
| C | 0.820453  | 2.282962  | -0.259367 |
| C | -1.918020 | 2.399939  | -0.783585 |
| H | -1.512073 | 1.034575  | -2.407665 |
| C | -0.009253 | 3.067723  | 0.531466  |
| H | 1.889089  | 2.229701  | -0.063827 |
| C | -1.388186 | 3.120225  | 0.290391  |
| H | -2.984475 | 2.444627  | -0.991068 |
| H | 0.416694  | 3.639873  | 1.351903  |
| H | -2.033159 | 3.728795  | 0.916646  |
| H | 1.444124  | -1.608245 | -1.792291 |
| H | -0.972020 | -0.226104 | 2.085616  |
| C | 2.965257  | -0.699242 | 0.295461  |
| C | 3.590880  | 0.008262  | 1.326427  |
| N | 3.641608  | -1.328565 | -0.672978 |
| C | 4.980108  | 0.056064  | 1.347844  |
| H | 2.994247  | 0.508983  | 2.079910  |
| C | 4.975197  | -1.277023 | -0.638351 |
| C | 5.692175  | -0.599954 | 0.346824  |
| H | 5.497860  | 0.600134  | 2.130955  |
| H | 5.495468  | -1.800684 | -1.435852 |
| H | 6.775881  | -0.588729 | 0.322618  |
| C | -2.704099 | -0.963272 | 0.287278  |
| C | -3.380782 | -0.049425 | 1.097539  |
| N | -3.324907 | -1.886957 | -0.457548 |
| C | -4.770627 | -0.120538 | 1.152879  |
| H | -2.850284 | 0.726514  | 1.640163  |
| C | -4.655030 | -1.939956 | -0.397936 |
| C | -5.423548 | -1.085824 | 0.395936  |
| H | -5.328960 | 0.576000  | 1.768955  |
| H | -5.132049 | -2.699730 | -1.010603 |
| H | -6.503486 | -1.177590 | 0.406948  |

Structure **TS3\_d**

|   |           |           |           |
|---|-----------|-----------|-----------|
| C | -0.828188 | -0.959842 | 1.215131  |
| C | -1.482443 | -0.803469 | -0.051785 |
| C | 1.229224  | -0.956886 | 0.005734  |
| C | 0.552941  | -1.168393 | 1.191590  |
| H | 1.118566  | -1.396552 | 2.085261  |
| N | 0.506929  | -0.722065 | -1.109166 |
| N | -0.816487 | -0.662912 | -1.171889 |
| O | -0.985049 | 1.050400  | 1.902710  |
| C | -0.268777 | 1.744702  | 1.059334  |
| C | 1.134818  | 1.898784  | 1.227006  |
| C | -0.843650 | 2.297983  | -0.118488 |
| C | 1.911401  | 2.531357  | 0.259995  |
| H | 1.589297  | 1.498297  | 2.129883  |
| C | -0.056910 | 2.921350  | -1.078932 |
| H | -1.918376 | 2.200297  | -0.255088 |
| C | 1.329257  | 3.029292  | -0.908843 |
| H | 2.984540  | 2.621395  | 0.410434  |
| H | -0.522607 | 3.321017  | -1.976243 |
| H | 1.940286  | 3.510811  | -1.665990 |
| H | -1.412326 | -1.227431 | 2.084976  |
| H | 0.961228  | -0.626266 | -2.010743 |
| C | -2.967523 | -0.753060 | -0.146928 |
| C | -3.712834 | -0.218044 | 0.907654  |
| N | -3.523050 | -1.236098 | -1.266503 |
| C | -5.099938 | -0.189916 | 0.790447  |
| H | -3.201620 | 0.198958  | 1.768551  |
| C | -4.853064 | -1.200302 | -1.363410 |
| C | -5.686599 | -0.692496 | -0.365967 |



|   |           |           |           |
|---|-----------|-----------|-----------|
| H | -5.708851 | 0.224723  | 1.587152  |
| H | -5.276600 | -1.602201 | -2.280180 |
| H | -6.762206 | -0.693480 | -0.501740 |
| C | 2.706693  | -0.999610 | -0.110905 |
| C | 3.382548  | -0.249560 | -1.075279 |
| N | 3.327300  | -1.775562 | 0.786856  |
| C | 4.771993  | -0.335044 | -1.121418 |
| H | 2.852385  | 0.418441  | -1.746686 |
| C | 4.657024  | -1.843692 | 0.733178  |
| C | 5.424900  | -1.150250 | -0.204794 |
| H | 5.330115  | 0.236492  | -1.855126 |
| H | 5.134007  | -2.481953 | 1.471605  |
| H | 6.504484  | -1.246701 | -0.202759 |

Structure **int5\_a**

|   |           |           |           |
|---|-----------|-----------|-----------|
| C | -0.924291 | -1.460357 | 0.899762  |
| C | -1.519790 | -0.830416 | -0.220629 |
| C | 1.185169  | -1.020230 | -0.109699 |
| C | 0.445521  | -1.572483 | 0.940945  |
| H | 0.945463  | -2.046611 | 1.775346  |
| N | 0.508129  | -0.475364 | -1.124053 |
| N | -0.800774 | -0.351990 | -1.217555 |
| O | -1.092191 | 0.930735  | 2.220494  |
| C | -0.267162 | 1.530322  | 1.440136  |
| C | 1.155037  | 1.456066  | 1.622540  |
| C | -0.704605 | 2.274428  | 0.293745  |
| C | 2.041669  | 2.019252  | 0.711225  |
| H | 1.525925  | 0.920980  | 2.494930  |
| C | 0.194398  | 2.819165  | -0.611037 |
| H | -1.776928 | 2.368860  | 0.134315  |
| C | 1.579129  | 2.680575  | -0.431385 |
| H | 3.112918  | 1.915998  | 0.877261  |
| H | -0.183120 | 3.350381  | -1.482291 |
| H | 2.276550  | 3.101158  | -1.148875 |
| H | -1.558641 | -1.854827 | 1.681465  |
| H | 1.054952  | -0.076730 | -1.889516 |
| C | -2.992268 | -0.655321 | -0.316866 |
| C | -3.552903 | 0.202871  | -1.265928 |
| N | -3.719989 | -1.354843 | 0.561973  |
| C | -4.937545 | 0.331107  | -1.301206 |
| H | -2.913715 | 0.753840  | -1.945825 |
| C | -5.046746 | -1.223626 | 0.515503  |
| C | -5.703893 | -0.395888 | -0.394899 |
| H | -5.408583 | 0.991007  | -2.022092 |
| H | -5.611824 | -1.805578 | 1.238355  |
| H | -6.785630 | -0.326520 | -0.385487 |
| C | 2.660235  | -0.985486 | -0.228380 |
| C | 3.491640  | -1.378702 | 0.818139  |
| N | 3.115182  | -0.511247 | -1.394878 |
| C | 4.867697  | -1.265322 | 0.635761  |
| H | 3.089242  | -1.745791 | 1.754745  |
| C | 4.432145  | -0.406850 | -1.558538 |
| C | 5.350119  | -0.769336 | -0.570398 |
| H | 5.548413  | -1.555878 | 1.428368  |
| H | 4.770009  | -0.018740 | -2.514841 |
| H | 6.413318  | -0.661934 | -0.750958 |

Structure **int5\_b**

|   |           |           |          |
|---|-----------|-----------|----------|
| C | -0.907796 | -0.932964 | 1.412135 |
| C | -1.515475 | -0.859315 | 0.134070 |
| C | 1.191104  | -0.974666 | 0.296435 |
| C | 0.463516  | -1.021035 | 1.487548 |
| H | 0.970163  | -1.093592 | 2.440901 |

|   |           |           |           |
|---|-----------|-----------|-----------|
| N | 0.502515  | -0.928035 | -0.848828 |
| N | -0.807612 | -0.866091 | -0.978868 |
| O | -1.039195 | 1.734148  | 1.742329  |
| C | -0.250004 | 1.980360  | 0.757547  |
| C | 1.176903  | 1.998818  | 0.904500  |
| C | -0.737645 | 2.190892  | -0.574626 |
| C | 2.024852  | 2.159935  | -0.186258 |
| H | 1.583607  | 1.859988  | 1.904635  |
| C | 0.122806  | 2.338792  | -1.652588 |
| H | -1.816103 | 2.197007  | -0.721008 |
| C | 1.514862  | 2.304794  | -1.480455 |
| H | 3.102328  | 2.143067  | -0.030055 |
| H | -0.291193 | 2.468953  | -2.650196 |
| H | 2.181412  | 2.412334  | -2.330282 |
| H | -1.522222 | -0.966495 | 2.302548  |
| H | 1.042843  | -0.898688 | -1.715592 |
| C | -2.990807 | -0.744665 | -0.015550 |
| C | -3.703968 | 0.061430  | 0.874249  |
| N | -3.556515 | -1.424120 | -1.020552 |
| C | -5.083777 | 0.155809  | 0.711479  |
| H | -3.166563 | 0.628019  | 1.629072  |
| C | -4.879978 | -1.324330 | -1.159931 |
| C | -5.687154 | -0.553662 | -0.321631 |
| H | -5.673819 | 0.778683  | 1.375670  |
| H | -5.318913 | -1.888805 | -1.978229 |
| H | -6.758112 | -0.513277 | -0.485285 |
| C | 2.665485  | -0.986241 | 0.161673  |
| C | 3.505452  | -0.900998 | 1.269972  |
| N | 3.110288  | -1.045019 | -1.099612 |
| C | 4.879609  | -0.872353 | 1.046122  |
| H | 3.110516  | -0.842143 | 2.277194  |
| C | 4.425869  | -1.016105 | -1.302421 |
| C | 5.351697  | -0.928448 | -0.260713 |
| H | 5.566896  | -0.801930 | 1.882003  |
| H | 4.755585  | -1.064695 | -2.335891 |
| H | 6.413105  | -0.905037 | -0.478440 |

Structure **int5\_c**

|   |           |           |           |
|---|-----------|-----------|-----------|
| C | -0.892048 | -1.491584 | 0.809855  |
| C | -1.528851 | -0.807496 | -0.255194 |
| C | 1.184743  | -0.958675 | -0.231697 |
| C | 0.478266  | -1.583826 | 0.803723  |
| H | 1.038228  | -2.087753 | 1.580275  |
| N | 0.472695  | -0.348470 | -1.183299 |
| N | -0.845789 | -0.245891 | -1.231398 |
| O | -1.097448 | 0.921589  | 2.172170  |
| C | -0.266480 | 1.533612  | 1.409632  |
| C | 1.155229  | 1.436967  | 1.588797  |
| C | -0.695103 | 2.318689  | 0.286374  |
| C | 2.047961  | 2.008199  | 0.689538  |
| H | 1.520334  | 0.870921  | 2.443221  |
| C | 0.209807  | 2.869609  | -0.608440 |
| H | -1.766135 | 2.435468  | 0.133478  |
| C | 1.593491  | 2.700513  | -0.439074 |
| H | 3.117800  | 1.886091  | 0.851987  |
| H | -0.161153 | 3.430121  | -1.463991 |
| H | 2.295714  | 3.131537  | -1.145746 |
| H | -1.498468 | -1.937396 | 1.586586  |
| H | 0.938841  | 0.184625  | -1.912772 |
| C | -3.006811 | -0.658876 | -0.307514 |
| C | -3.608189 | 0.233908  | -1.197722 |
| N | -3.697580 | -1.417799 | 0.551461  |
| C | -4.995593 | 0.335074  | -1.191809 |

|   |           |           |           |
|---|-----------|-----------|-----------|
| H | -2.997748 | 0.830985  | -1.864889 |
| C | -5.027369 | -1.312245 | 0.544629  |
| C | -5.723802 | -0.452732 | -0.305180 |
| H | -5.497813 | 1.020458  | -1.866385 |
| H | -5.562196 | -1.942182 | 1.250034  |
| H | -6.806089 | -0.406618 | -0.265432 |
| C | 2.663331  | -0.951958 | -0.314353 |
| C | 3.345967  | -0.606415 | -1.481157 |
| N | 3.280057  | -1.284623 | 0.826777  |
| C | 4.738245  | -0.571278 | -1.443237 |
| H | 2.831966  | -0.387822 | -2.410938 |
| C | 4.609939  | -1.253373 | 0.847745  |
| C | 5.385816  | -0.891379 | -0.257045 |
| H | 5.300599  | -0.303059 | -2.330787 |
| H | 5.081890  | -1.526709 | 1.787135  |
| H | 6.466825  | -0.874313 | -0.181153 |

Structure **int5\_d**

|   |           |           |           |
|---|-----------|-----------|-----------|
| C | -0.880356 | -1.021798 | 1.316494  |
| C | -1.528855 | -0.840160 | 0.069121  |
| C | 1.185560  | -0.966065 | 0.133195  |
| C | 0.490994  | -1.117584 | 1.337486  |
| H | 1.056477  | -1.272463 | 2.246676  |
| N | 0.462823  | -0.795458 | -0.979370 |
| N | -0.856873 | -0.727064 | -1.057847 |
| O | -1.046530 | 1.646318  | 1.743876  |
| C | -0.243955 | 1.945290  | 0.785909  |
| C | 1.181532  | 1.937496  | 0.949541  |
| C | -0.713790 | 2.246157  | -0.536015 |
| C | 2.043836  | 2.144864  | -0.121312 |
| H | 1.575089  | 1.730292  | 1.942453  |
| C | 0.160503  | 2.438048  | -1.595373 |
| H | -1.790295 | 2.278075  | -0.692597 |
| C | 1.550654  | 2.365673  | -1.412168 |
| H | 3.119040  | 2.102454  | 0.045432  |
| H | -0.239954 | 2.633130  | -2.587918 |
| H | 2.228187  | 2.512635  | -2.247400 |
| H | -1.466219 | -1.132008 | 2.220294  |
| H | 0.922021  | -0.606722 | -1.866296 |
| C | -3.009567 | -0.733687 | -0.029064 |
| C | -3.710933 | -0.031245 | 0.953036  |
| N | -3.592272 | -1.322157 | -1.080661 |
| C | -5.096011 | 0.052922  | 0.836100  |
| H | -3.163697 | 0.470488  | 1.744968  |
| C | -4.920348 | -1.233242 | -1.176027 |
| C | -5.716315 | -0.563196 | -0.245745 |
| H | -5.677056 | 0.597100  | 1.573321  |
| H | -5.372456 | -1.722967 | -2.034328 |
| H | -6.791847 | -0.526602 | -0.377142 |
| C | 2.663721  | -0.996164 | 0.041212  |
| C | 3.334507  | -1.149277 | -1.172452 |
| N | 3.292322  | -0.848057 | 1.214373  |
| C | 4.727210  | -1.107123 | -1.164828 |
| H | 2.812199  | -1.320535 | -2.107404 |
| C | 4.622308  | -0.817725 | 1.208838  |
| C | 5.386967  | -0.930063 | 0.044192  |
| H | 5.280310  | -1.218245 | -2.090936 |
| H | 5.103753  | -0.695884 | 2.174907  |
| H | 6.468709  | -0.888864 | 0.096665  |

Structure **3a**

|   |          |           |           |
|---|----------|-----------|-----------|
| C | 1.854801 | 0.030136  | 0.000032  |
| C | 1.172576 | -1.188594 | -0.000053 |

|   |           |           |           |
|---|-----------|-----------|-----------|
| C | 1.126949  | 1.219423  | -0.000029 |
| C | -0.219351 | -1.222870 | 0.000055  |
| H | 1.727030  | -2.121954 | -0.000074 |
| C | -0.267778 | 1.199460  | -0.000011 |
| H | 1.642655  | 2.174692  | -0.000062 |
| C | -0.937708 | -0.025256 | 0.000140  |
| H | -0.760802 | -2.163385 | 0.000067  |
| H | -0.832703 | 2.127715  | -0.000138 |
| H | 2.939307  | 0.051390  | 0.000032  |
| O | -2.299808 | -0.113800 | -0.000174 |
| H | -2.693959 | 0.768150  | 0.000070  |

Structure **4a\_a**

|   |           |           |           |
|---|-----------|-----------|-----------|
| C | 0.687375  | -1.333290 | 0.044917  |
| C | 1.337842  | -0.089470 | 0.003360  |
| C | -1.337839 | -0.089469 | 0.003339  |
| C | -0.687372 | -1.333290 | 0.044908  |
| H | -1.269372 | -2.246092 | 0.077008  |
| N | -0.660074 | 1.059488  | -0.034766 |
| N | 0.660080  | 1.059488  | -0.034769 |
| H | 1.269376  | -2.246092 | 0.077020  |
| C | 2.824964  | 0.009900  | -0.000049 |
| C | 3.467535  | 1.251780  | 0.018822  |
| N | 3.492726  | -1.151668 | -0.020626 |
| C | 4.857882  | 1.280329  | 0.014795  |
| H | 2.880608  | 2.161526  | 0.037073  |
| C | 4.826444  | -1.109721 | -0.024519 |
| C | 5.557696  | 0.077124  | -0.007635 |
| H | 5.385935  | 2.228207  | 0.029805  |
| H | 5.335901  | -2.069588 | -0.042194 |
| H | 6.641440  | 0.051277  | -0.011622 |
| C | -2.824964 | 0.009903  | -0.000075 |
| C | -3.467535 | 1.251799  | 0.017707  |
| N | -3.492730 | -1.151680 | -0.019586 |
| C | -4.857882 | 1.280344  | 0.013734  |
| H | -2.880612 | 2.161564  | 0.035083  |
| C | -4.826448 | -1.109738 | -0.023434 |
| C | -5.557699 | 0.077121  | -0.007566 |
| H | -5.385934 | 2.228236  | 0.027898  |
| H | -5.335906 | -2.069621 | -0.040206 |
| H | -6.641444 | 0.051271  | -0.011462 |

Structure **4a\_b**

|   |           |           |           |
|---|-----------|-----------|-----------|
| C | -0.692852 | 1.309741  | -0.269731 |
| C | -1.338027 | 0.089782  | -0.017596 |
| C | 1.337972  | 0.092731  | -0.025127 |
| C | 0.682816  | 1.309463  | -0.273473 |
| H | 1.246985  | 2.212256  | -0.481730 |
| N | 0.664300  | -1.036078 | 0.208409  |
| N | -0.656071 | -1.034676 | 0.210948  |
| H | -1.276000 | 2.202093  | -0.460650 |
| C | -2.825044 | -0.012440 | 0.005115  |
| C | -3.462330 | -1.231873 | 0.253415  |
| N | -3.496746 | 1.123977  | -0.224145 |
| C | -4.852645 | -1.264646 | 0.261799  |
| H | -2.871515 | -2.121320 | 0.433235  |
| C | -4.830299 | 1.078336  | -0.213149 |
| C | -5.556946 | -0.087675 | 0.024076  |
| H | -5.377175 | -2.195511 | 0.451255  |
| H | -5.343468 | 2.017402  | -0.402799 |
| H | -6.640784 | -0.066124 | 0.020995  |
| C | 2.825636  | 0.001983  | -0.006482 |
| C | 3.584126  | 1.052429  | 0.519152  |

|   |          |           |           |
|---|----------|-----------|-----------|
| N | 3.376644 | -1.112217 | -0.506656 |
| C | 4.971255 | 0.940025  | 0.522385  |
| H | 3.098964 | 1.928402  | 0.936109  |
| C | 4.707970 | -1.205265 | -0.499365 |
| C | 5.550080 | -0.211958 | 0.000775  |
| H | 5.585172 | 1.735958  | 0.930801  |
| H | 5.125087 | -2.117814 | -0.917336 |
| H | 6.625584 | -0.346179 | -0.020544 |

Structure **4a\_c**

|   |           |           |           |
|---|-----------|-----------|-----------|
| C | -0.688290 | 1.337976  | 0.003817  |
| C | -1.337971 | 0.095107  | 0.007040  |
| C | 1.337953  | 0.095148  | -0.006840 |
| C | 0.688226  | 1.337995  | -0.003599 |
| H | 1.253433  | 2.263527  | -0.018990 |
| N | 0.660387  | -1.056038 | -0.002983 |
| N | -0.660377 | -1.056054 | 0.003458  |
| H | -1.253560 | 2.263468  | 0.019267  |
| C | -2.825544 | -0.000844 | 0.008120  |

|   |           |           |           |
|---|-----------|-----------|-----------|
| C | -3.586179 | 0.912098  | -0.728505 |
| N | -3.373380 | -0.984009 | 0.734512  |
| C | -4.973093 | 0.798549  | -0.706180 |
| H | -3.103135 | 1.680184  | -1.322970 |
| C | -4.704509 | -1.079546 | 0.748633  |
| C | -5.549029 | -0.217055 | 0.049571  |
| H | -5.589061 | 1.488034  | -1.273926 |
| H | -5.119098 | -1.883203 | 1.351704  |
| H | -6.624203 | -0.345784 | 0.100297  |
| C | 2.825557  | -0.000834 | -0.008105 |
| C | 3.586340  | 0.912106  | 0.728467  |
| N | 3.373247  | -0.983959 | -0.734568 |
| C | 4.973200  | 0.798502  | 0.705980  |
| H | 3.103357  | 1.680192  | 1.322976  |
| C | 4.704436  | -1.079524 | -0.748889 |
| C | 5.549024  | -0.217143 | -0.049886 |
| H | 5.589335  | 1.487880  | 1.273675  |
| H | 5.118859  | -1.883202 | -1.352038 |
| H | 6.624194  | -0.345882 | -0.100671 |

## 9. NMR SPECTRA

**Figure S6:**  $^1\text{H}$  NMR ( $\text{CDCl}_3$ , 400 MHz) of **1b**

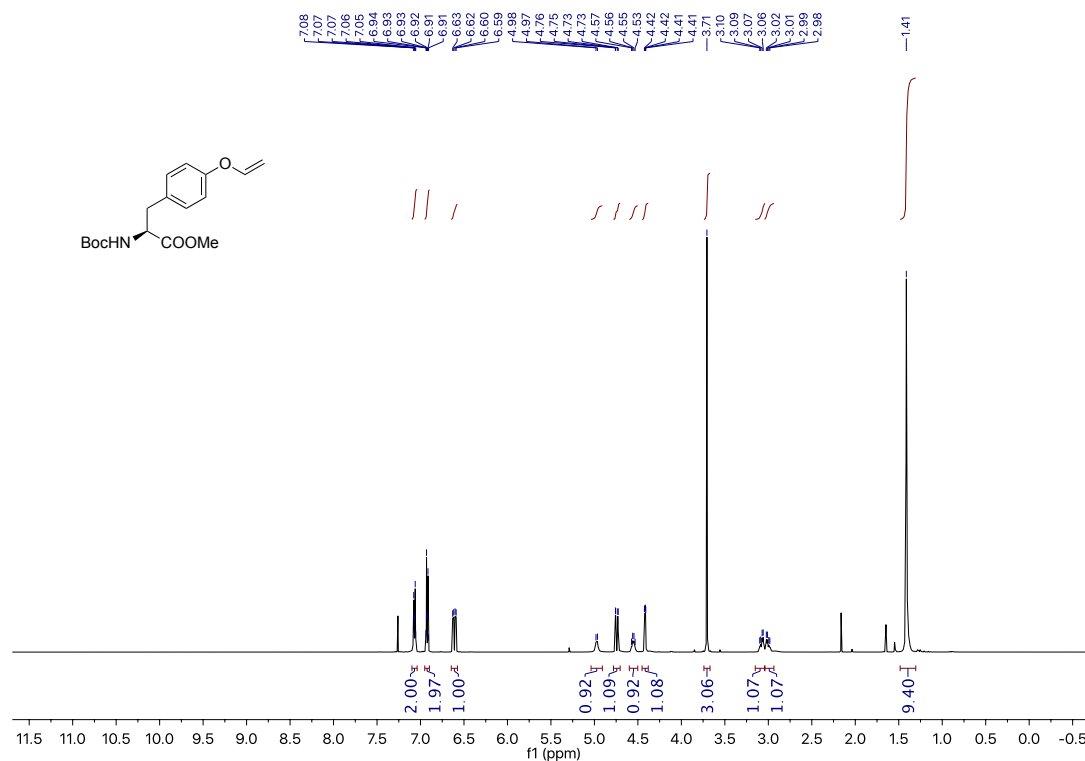

**Figure S7:**  $^{13}\text{C}$  NMR ( $\text{CDCl}_3$ , 126 MHz) of **1b**

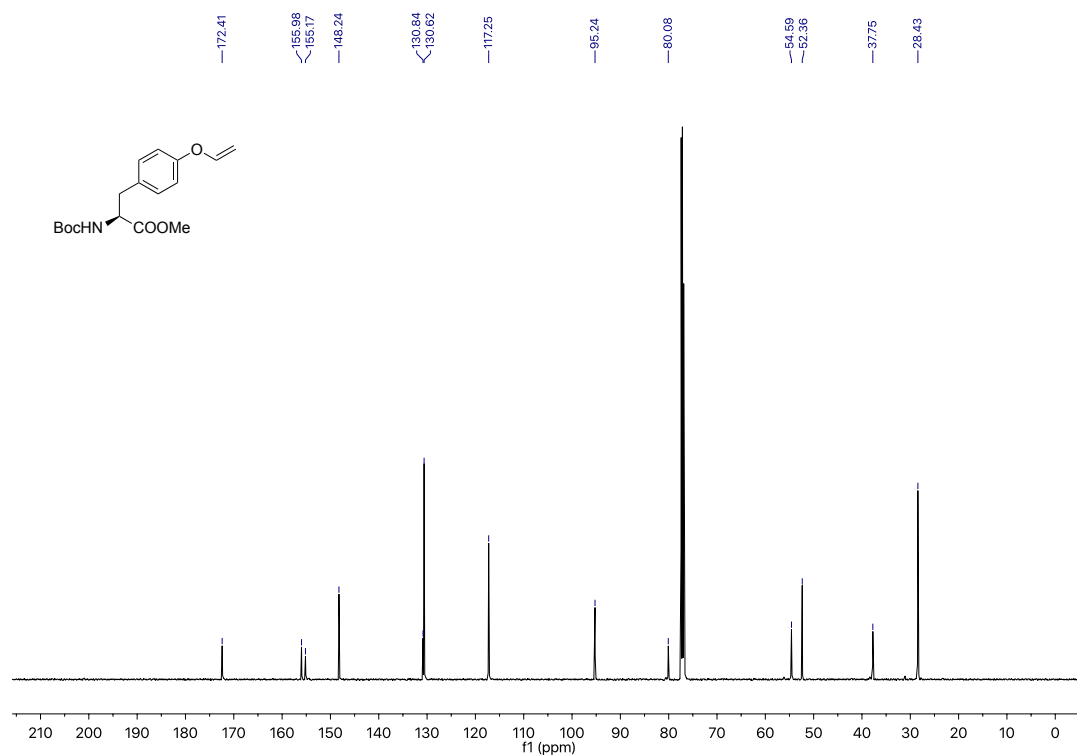

Figure S8:  $^1\text{H}$  NMR ( $\text{CDCl}_3$ , 500 MHz) of **1c**

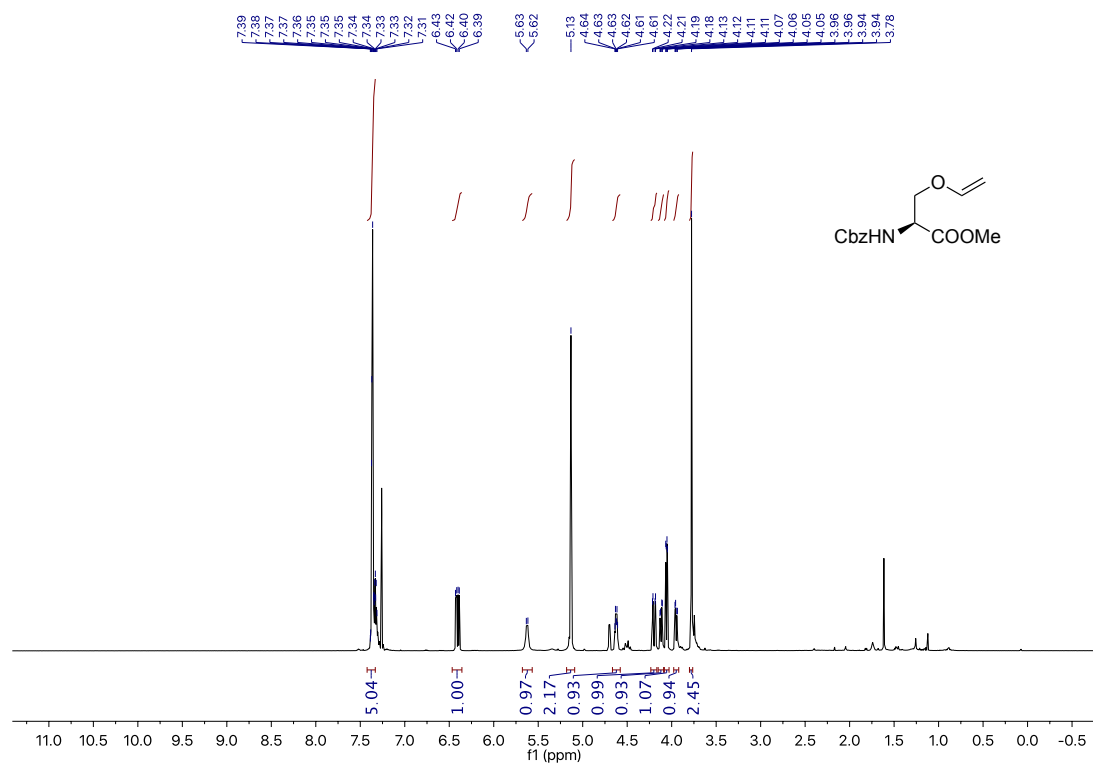

Figure S9:  $^{13}\text{C}$  NMR ( $\text{CDCl}_3$ , 126 MHz) of **1c**

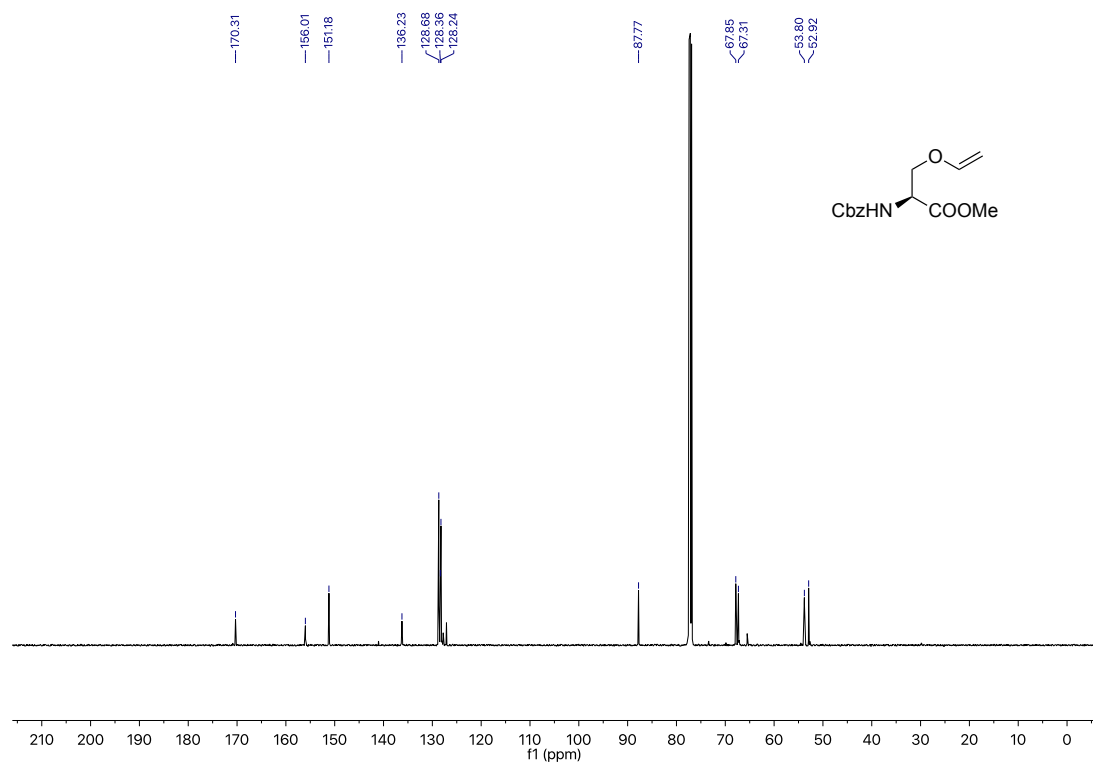

**Figure S10:**  $^1\text{H}$  NMR ( $\text{CDCl}_3$ , 400 MHz) of **1d**

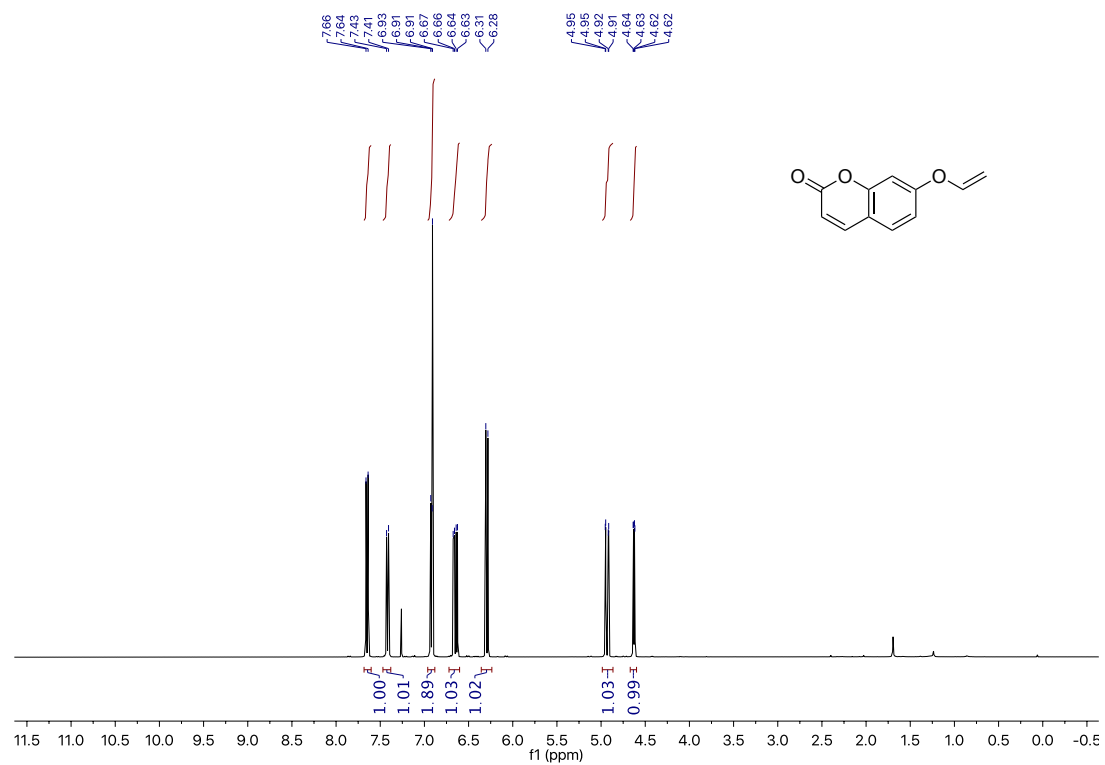

**Figure S11:**  $^{13}\text{C}$  NMR ( $\text{CDCl}_3$ , 101 MHz) of **1d**

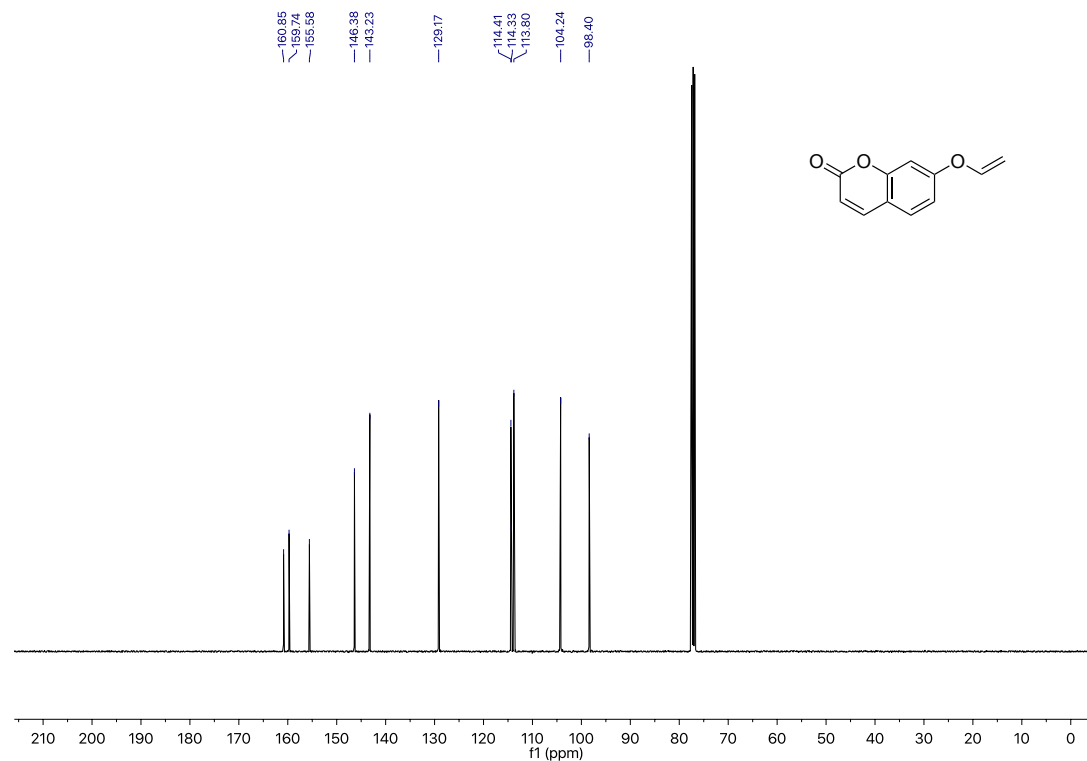

Figure S12:  $^1\text{H}$  NMR ( $\text{CDCl}_3$ , 500 MHz) of **1e**

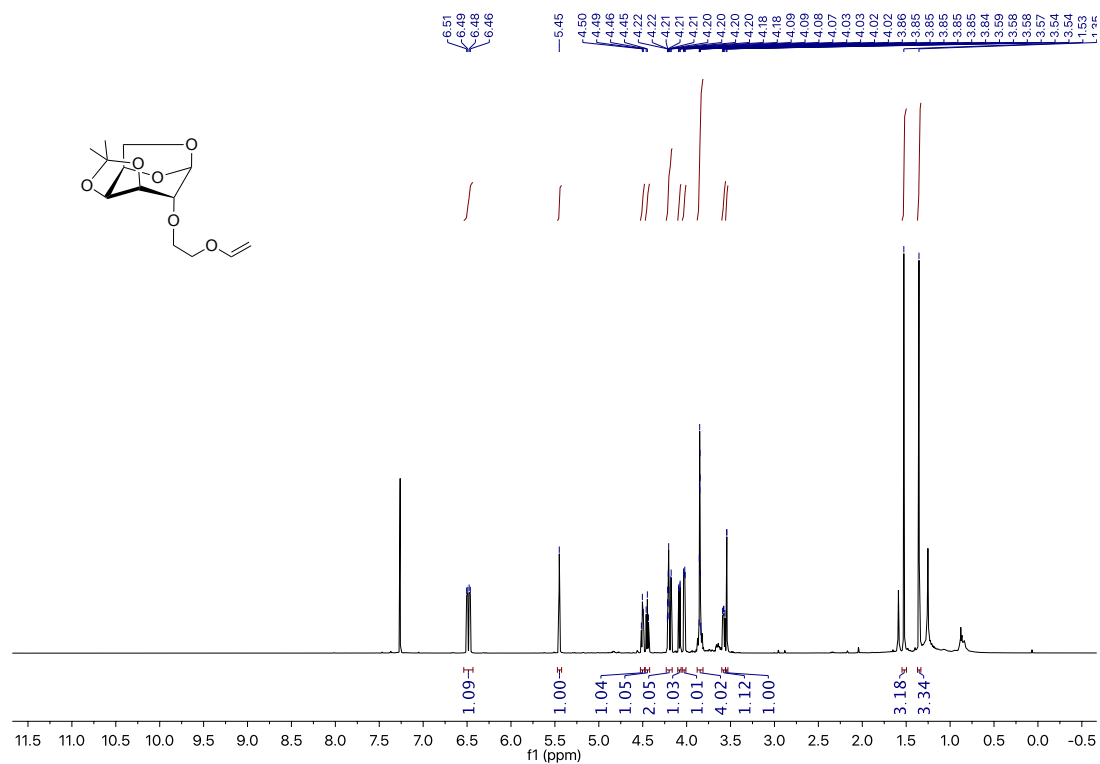

Figure S13:  $^{13}\text{C}$  NMR ( $\text{CDCl}_3$ , 126 MHz) of **13**

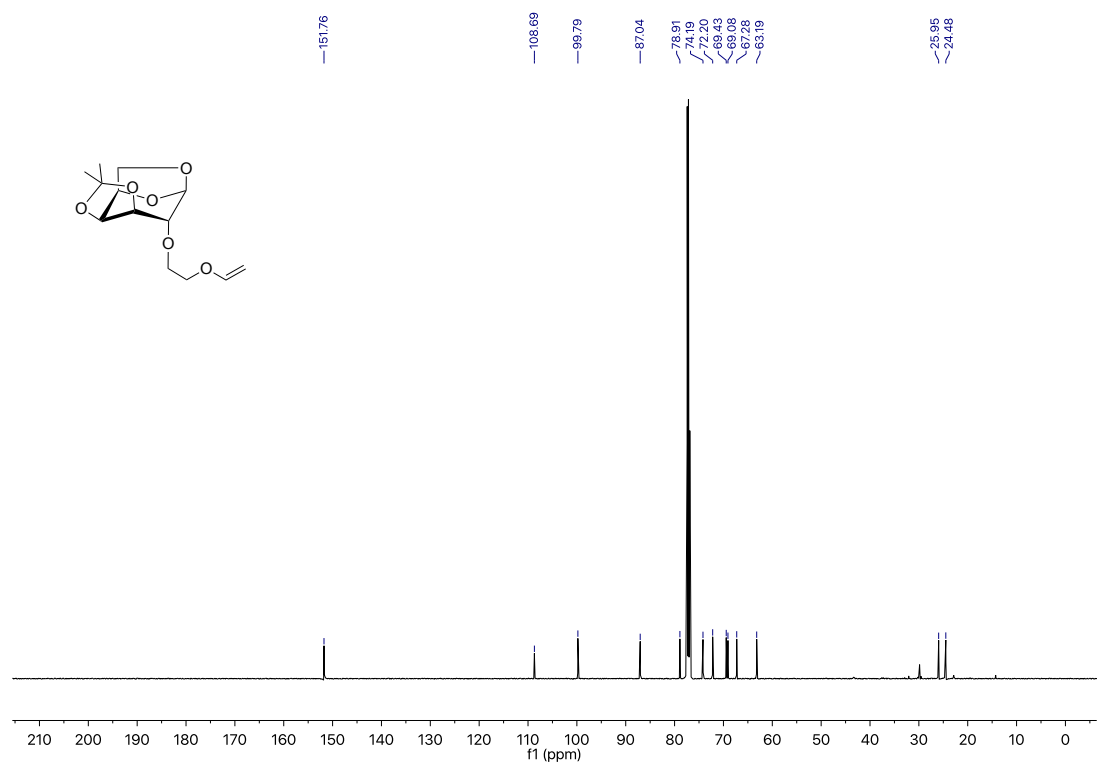

Figure S14:  $^1\text{H}$  NMR ( $\text{CDCl}_3$ , 400 MHz) of **5**

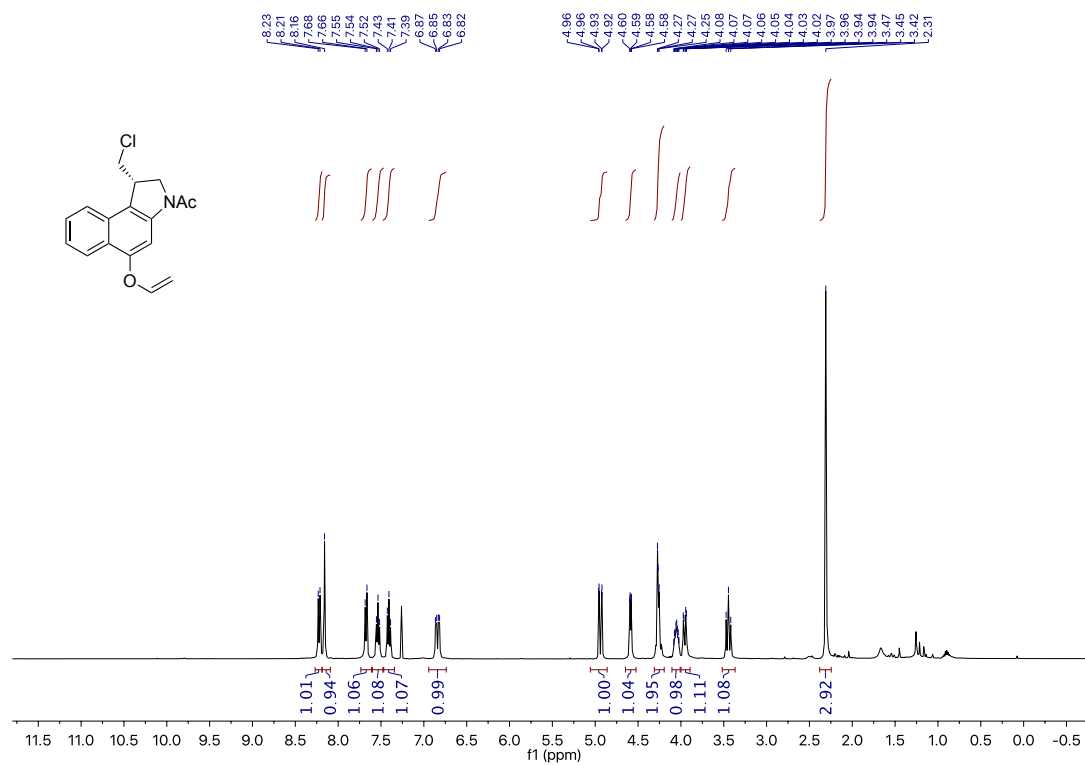

Figure S15:  $^{13}\text{C}$  NMR ( $\text{CDCl}_3$ , 101 MHz) of **5**

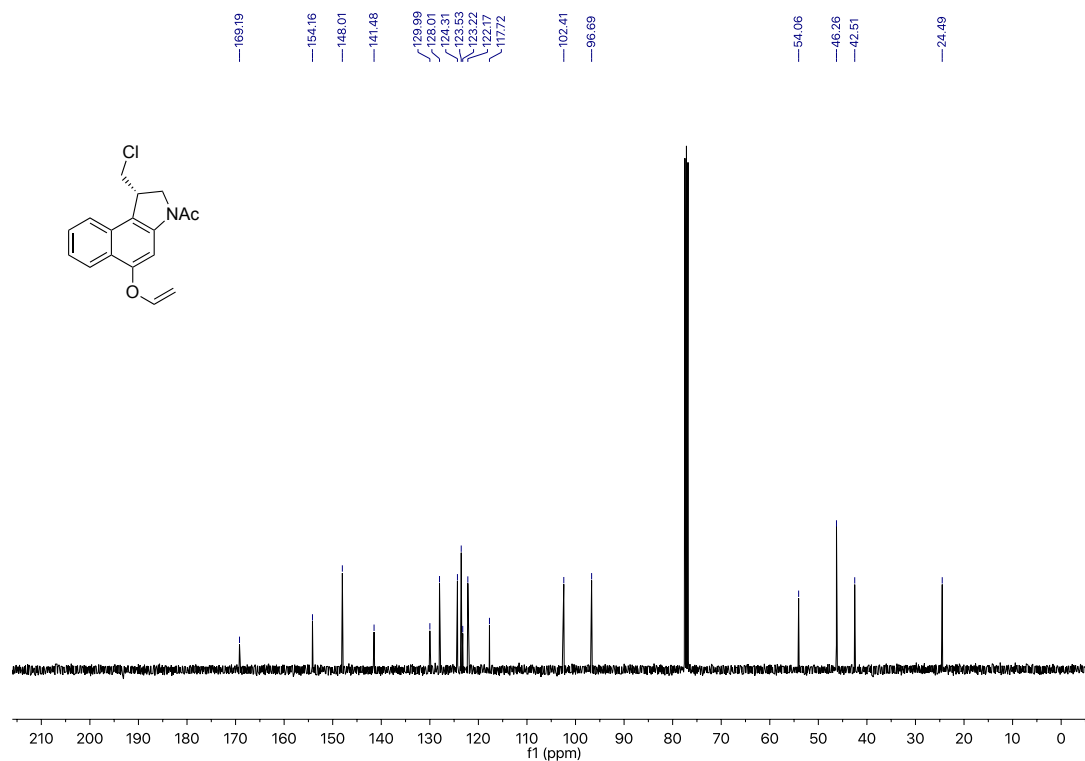



Figure S16:  $^1\text{H}$  NMR ( $\text{CDCl}_3$ , 500 MHz) of **4a**

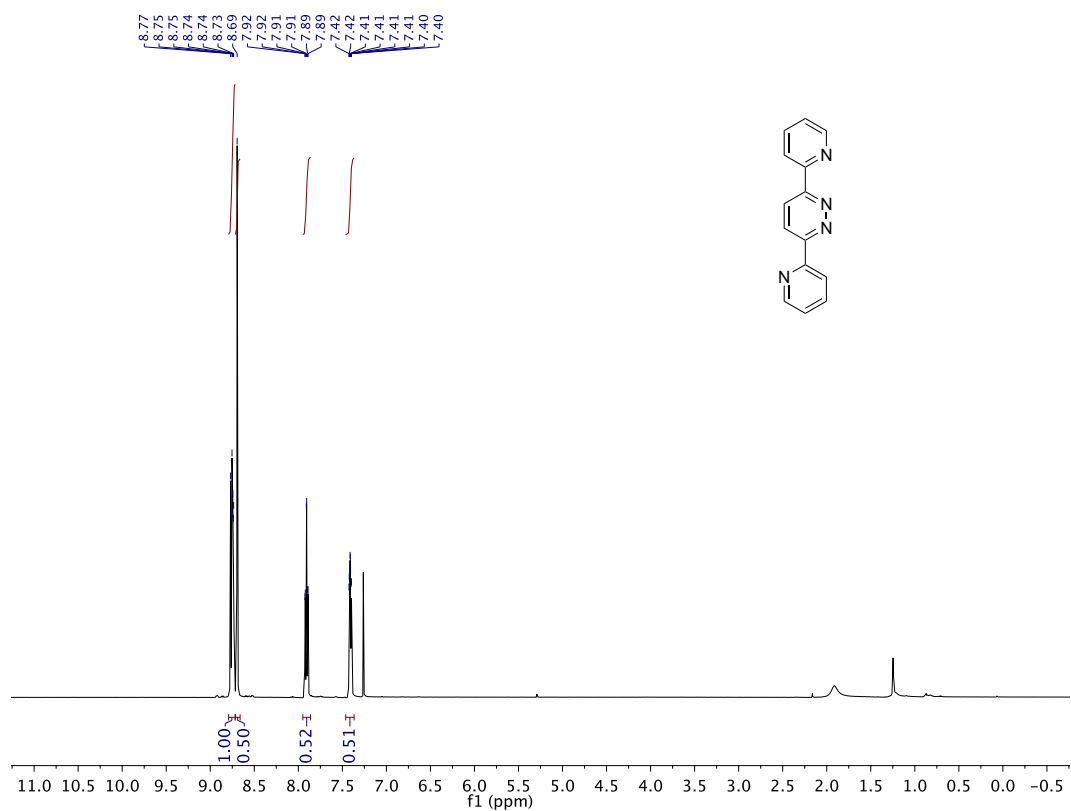

Figure S17:  $^{13}\text{C}$  NMR ( $\text{CDCl}_3$ , 126 MHz) of **4a**

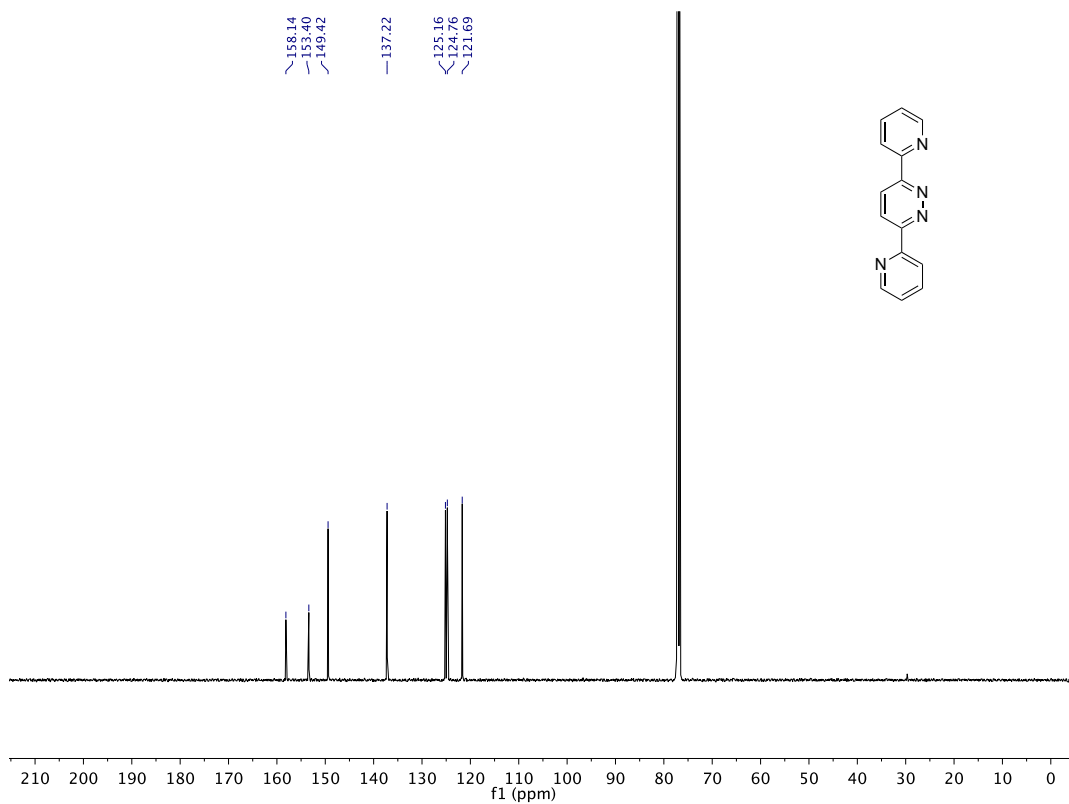

**Figure S18:**  $^1\text{H}$  NMR ( $\text{CDCl}_3$ , 400 MHz) of **3b**

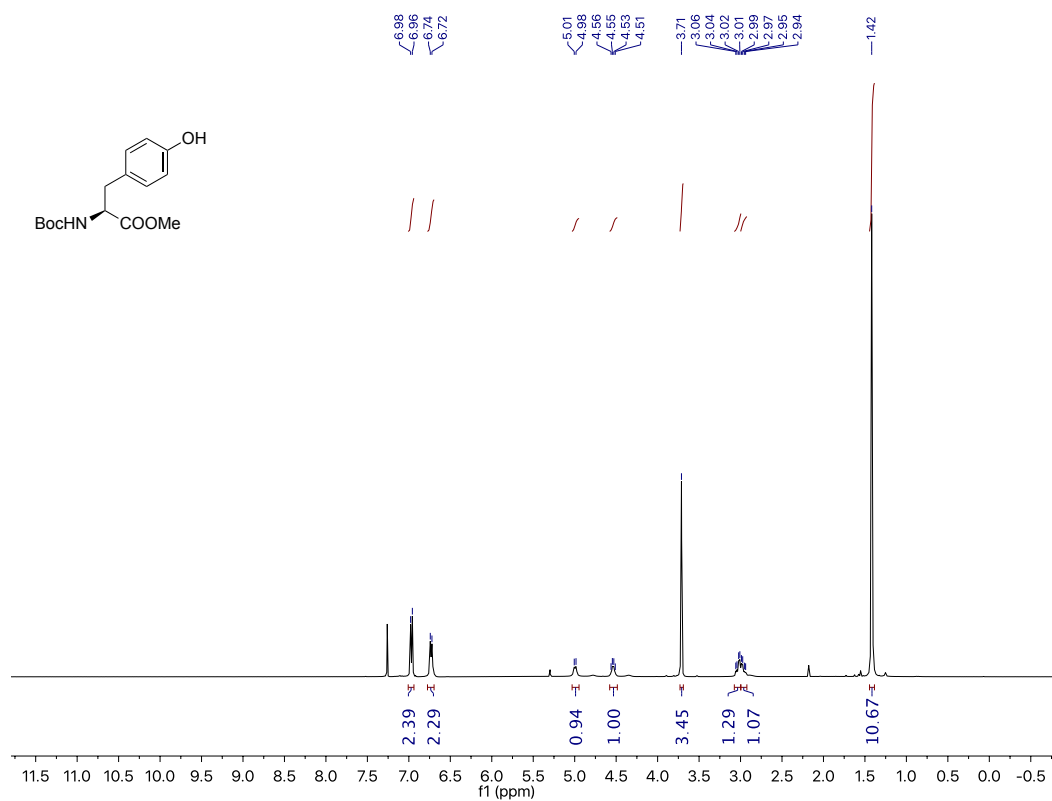

**Figure S19:**  $^{13}\text{C}$  NMR ( $\text{CDCl}_3$ , 101 MHz) of **3b**

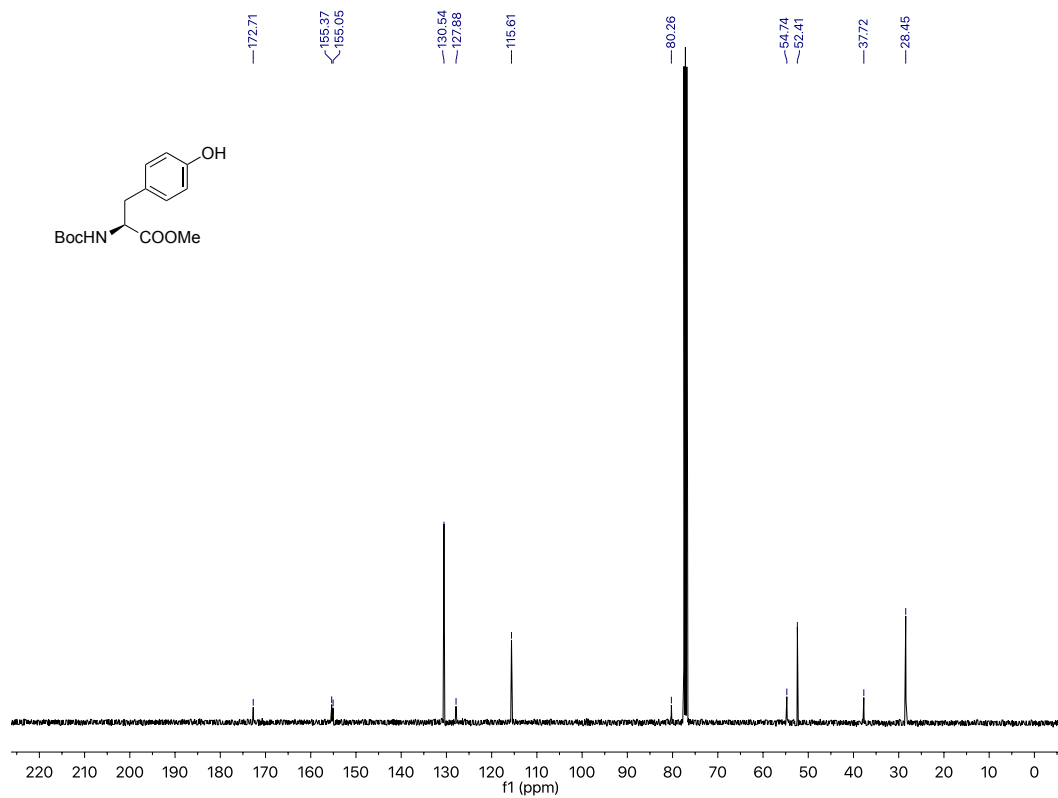

Figure S20:  $^1\text{H}$  NMR ( $\text{CDCl}_3$ , 400 MHz) of **3c**

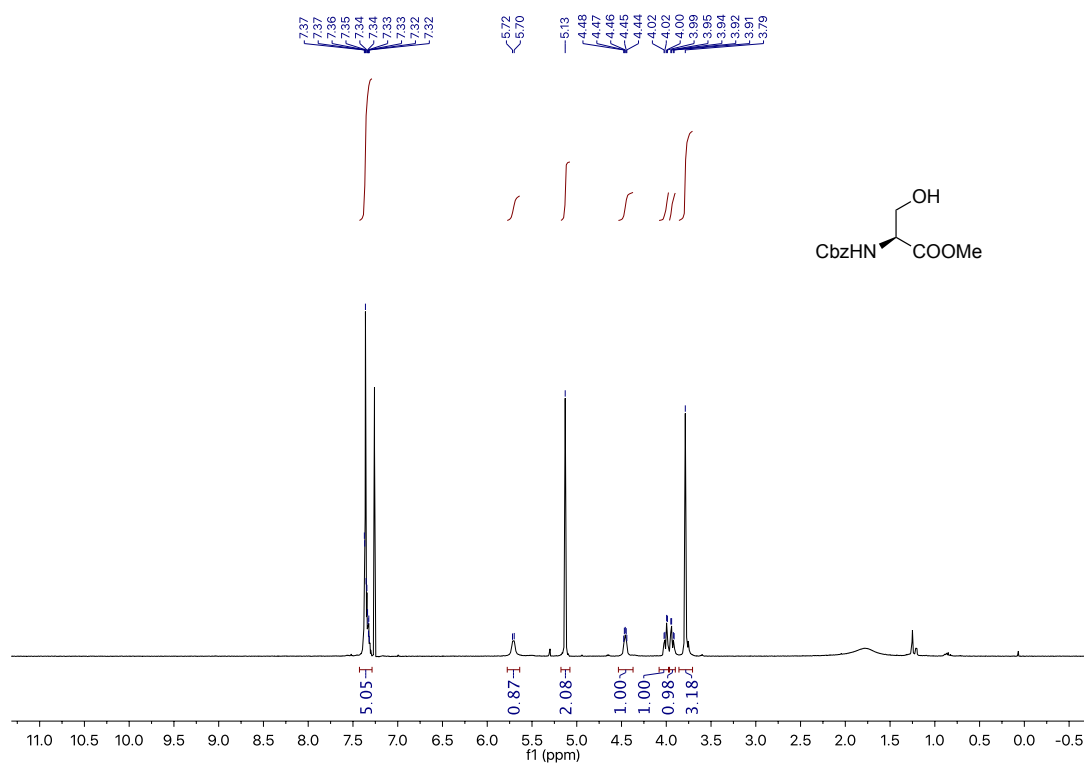

Figure S21:  $^{13}\text{C}$  NMR ( $\text{CDCl}_3$ , 101 MHz) of **3c**

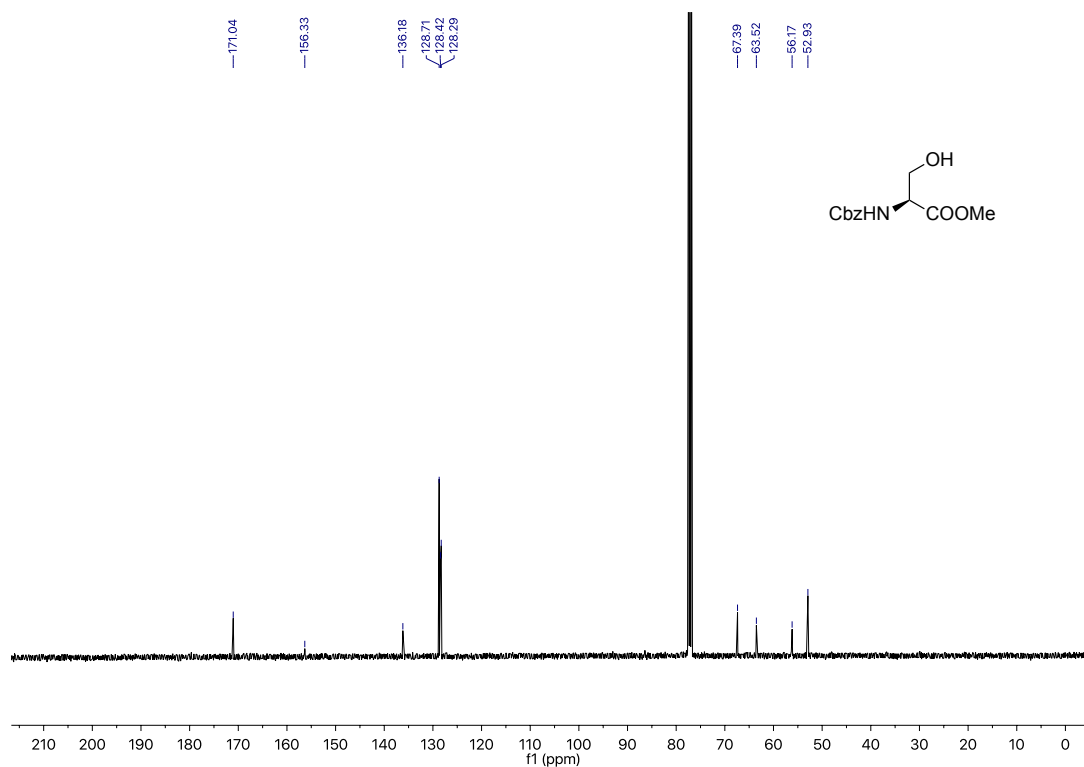

**Figure S22:**  $^1\text{H}$  NMR (MeOD, 500 MHz) of **3d**

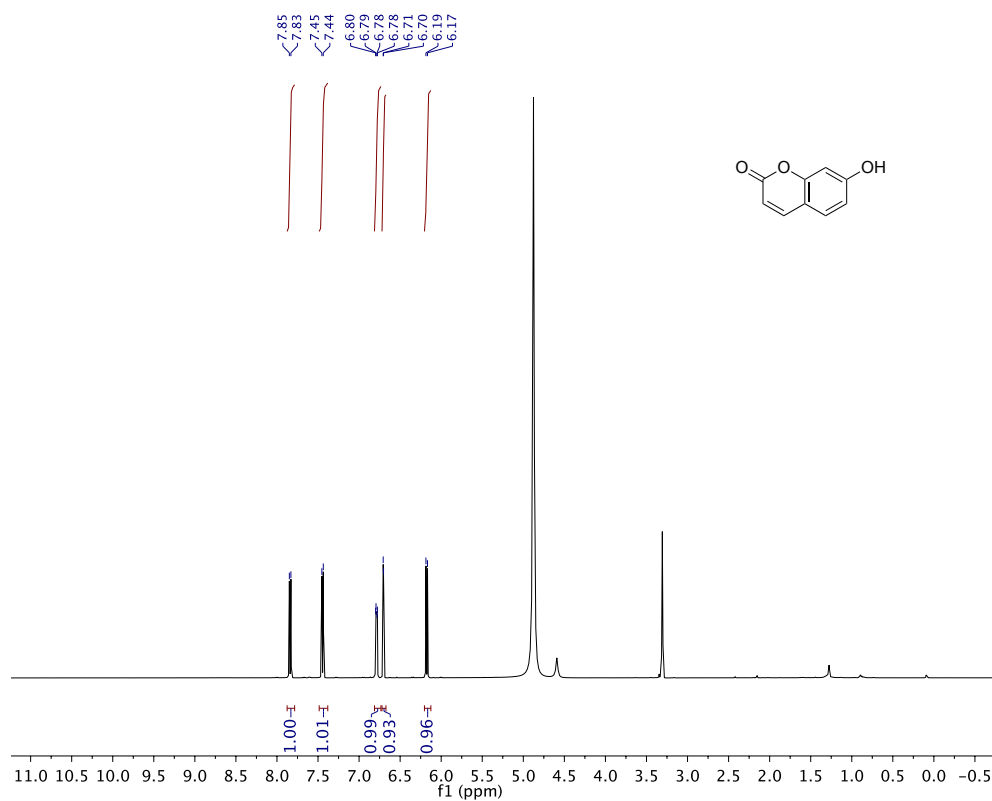

**Figure S23:**  $^{13}\text{C}$  NMR (MeOD, 126 MHz) of **3d**

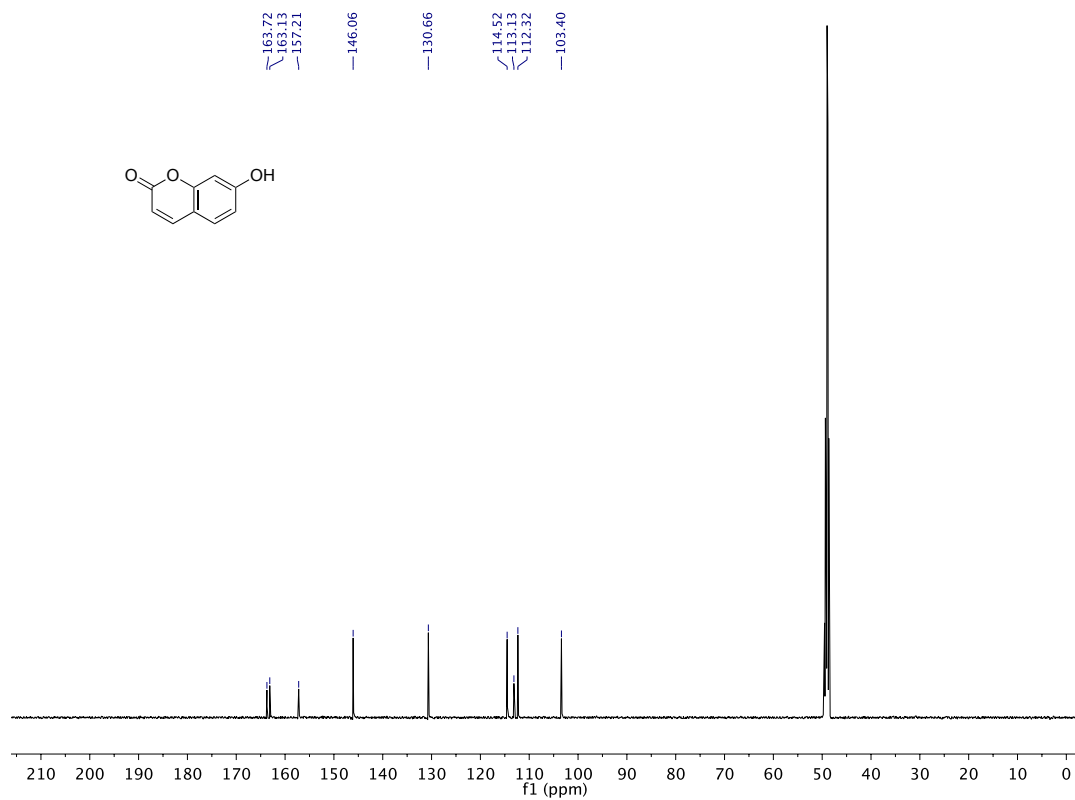

**Figure S24:**  $^1\text{H}$  NMR ( $\text{CDCl}_3$ , 400 MHz) of **3e**

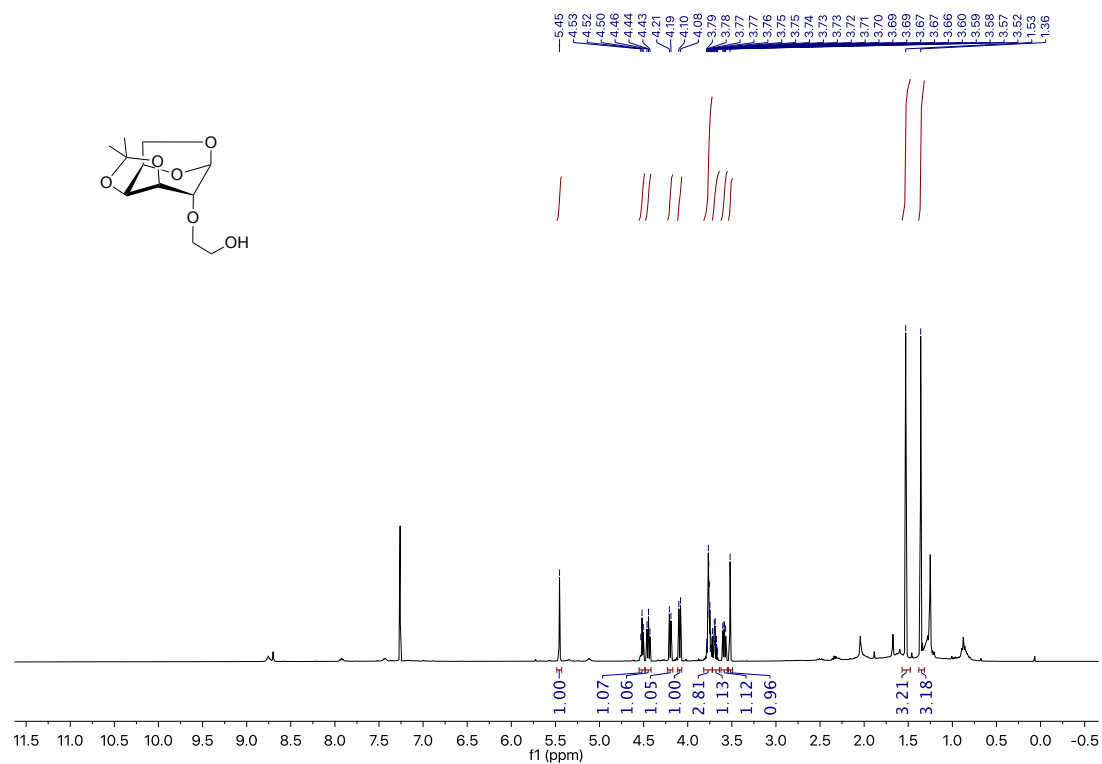

**Figure S25:**  $^{13}\text{C}$  NMR ( $\text{CDCl}_3$ , 101 MHz) of **3e**

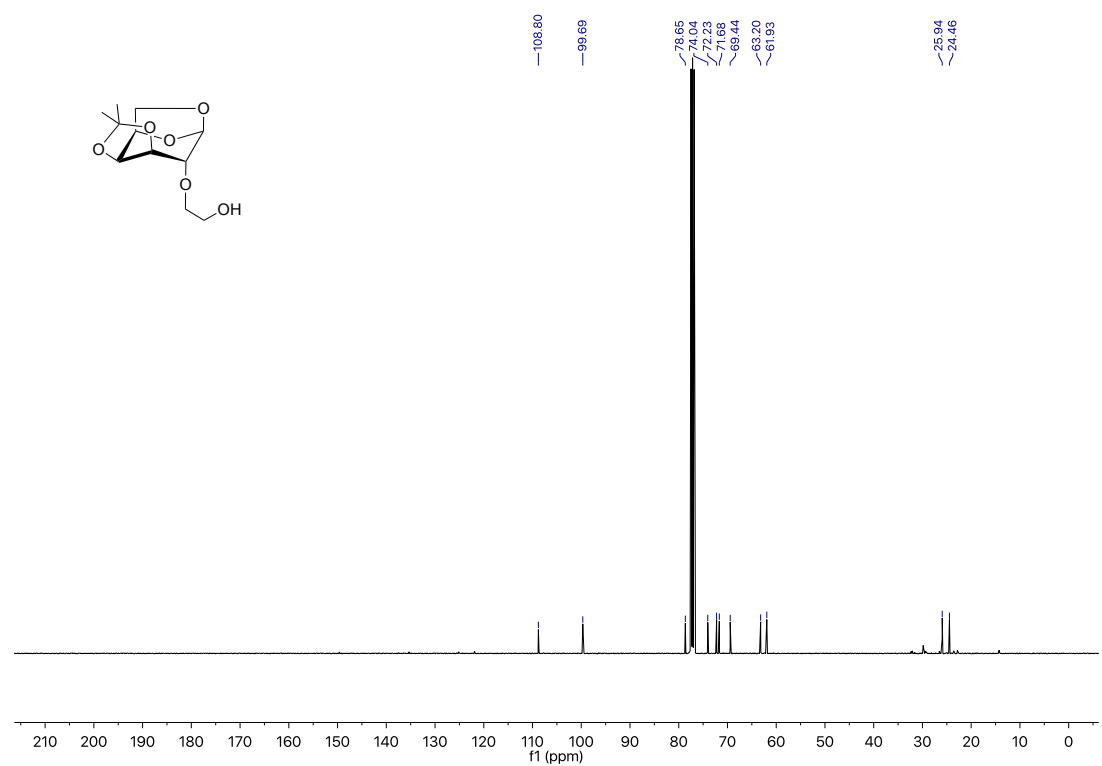

Figure S26:  $^1\text{H}$  NMR (DMSO- $d_6$ , 400 MHz) of **2c**

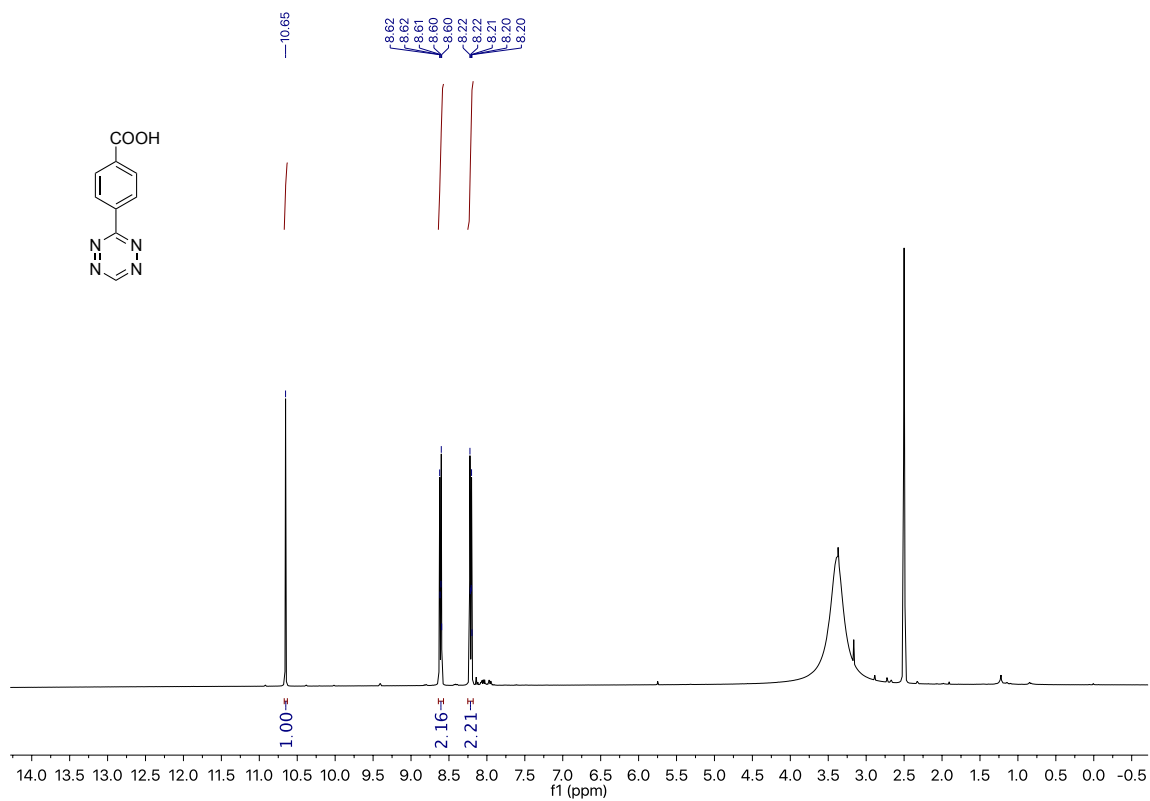

Figure S27:  $^{13}\text{C}$  NMR (DMSO- $d_6$ , 101 MHz) of **2c**

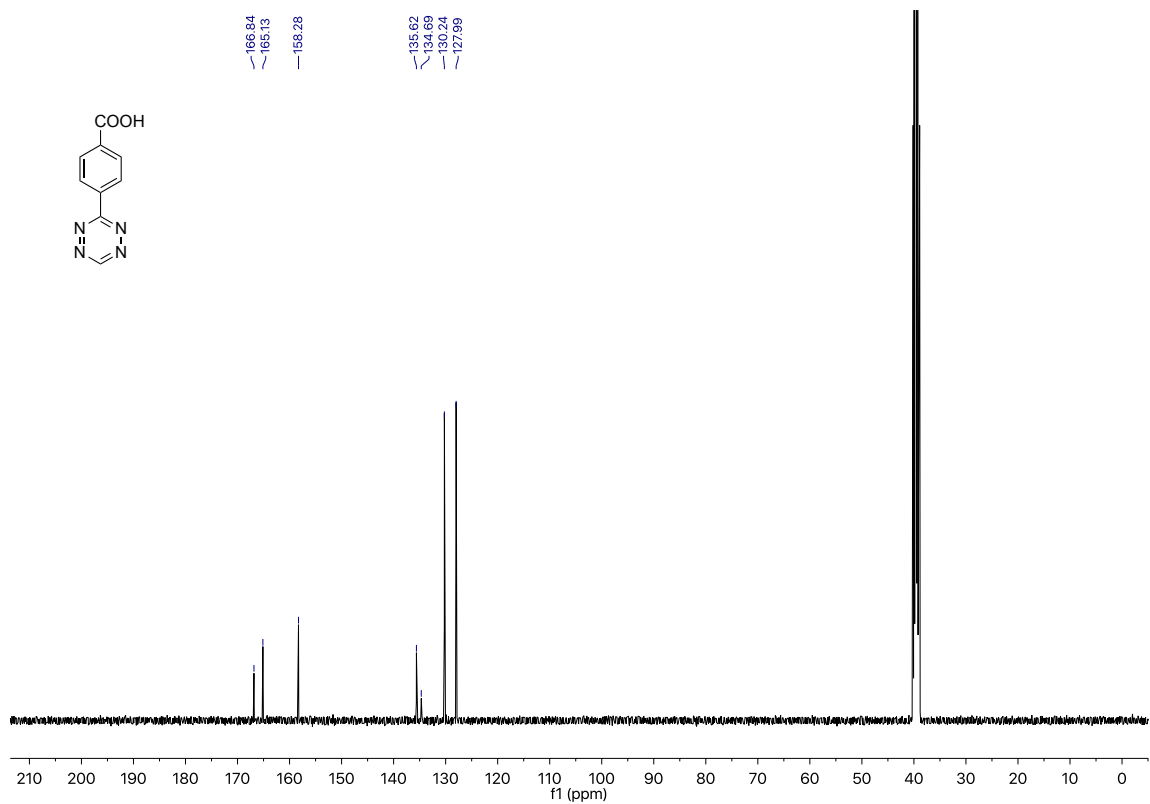

## 10. REFERENCES

- [1] M. Blouin, R. Frenette, *J. Org. Chem.* **2001**, *66*, 9043–9045.
- [2] M. Bosch, M. Schlaf, *J. Org. Chem.* **2003**, *68*, 5225–5227.
- [3] M. Tercel, S. M. Stribbling, H. Sheppard, B. G. Siim, K. Wu, S. M. Pullen, K. J. Botting, W. R. Wilson, W. A. Denny, *J. Med. Chem.* **2003**, *46*, 2132–2151.
- [4] a) R. Hoogenboom, B. C. Moore, U. S. Schubert, *J. Org. Chem.* **2006**, *71*, 4903–4909; b) Y. Xiao, Y. Xu, H.-S. Cheon, J. Chae, *J. Org. Chem.* **2013**, *78*, 5804–5809.
- [5] M. J. Frisch, G. W. Trucks, H. B. Schlegel, G. E. Scuseria, M. A. Robb, J. R. Cheeseman, G. Scalmani, V. Barone, B. Mennucci, G. A. Petersson, H. Nakatsuji, M. Caricato, X. Li, H. P. Hratchian, A. F. Izmaylov, J. Bloino, G. Zheng, J. L. Sonnenberg, M. Hada, M. Ehara, K. Toyota, R. Fukuda, J. Hasegawa, M. Ishida, T. Nakajima, Y. Honda, O. Kitao, H. Nakai, T. Vreven, J. A. Montgomery Jr., J. E. Peralta, F. Ogliaro, M. J. Bearpark, J. Heyd, E. N. Brothers, K. N. Kudin, V. N. Staroverov, R. Kobayashi, J. Normand, K. Raghavachari, A. P. Rendell, J. C. Burant, S. S. Iyengar, J. Tomasi, M. Cossi, N. Rega, N. J. Millam, M. Klene, J. E. Knox, J. B. Cross, V. Bakken, C. Adamo, J. Jaramillo, R. Gomperts, R. E. Stratmann, O. Yazyev, A. J. Austin, R. Cammi, C. Pomelli, J. W. Ochterski, R. L. Martin, K. Morokuma, V. G. Zakrzewski, G. A. Voth, P. Salvador, J. J. Dannenberg, S. Dapprich, A. D. Daniels, Ö. Farkas, J. B. Foresman, J. V. Ortiz, J. Cioslowski, D. J. Fox, Gaussian, Inc., Wallingford, CT, USA, **2009**.
- [6] Y. Zhao, D. G. Truhlar, *Theor. Chem. Acc.* **2008**, *120*, 215–241.
- [7] G. Scalmani, M. J. Frisch, *J. Chem. Phys.* **2010**, *132*, 114110.
- [8] R. F. Ribeiro, A. V. Marenich, C. J. Cramer, D. G. Truhlar, *J. Phys. Chem. B* **2011**, *115*, 14556–14562.
- [9] a) C. Gonzalez, H. B. Schlegel, *J. Chem. Phys.* **1989**, *90*, 2154–2161; b) C. Gonzalez, H. B. Schlegel, *J. Phys. Chem.* **1990**, *94*, 5523–5527.
